# Supplementary material
Source: ML conference proceedings conference paper supplement (https://aclanthology.org/2022.inlg-main.1)

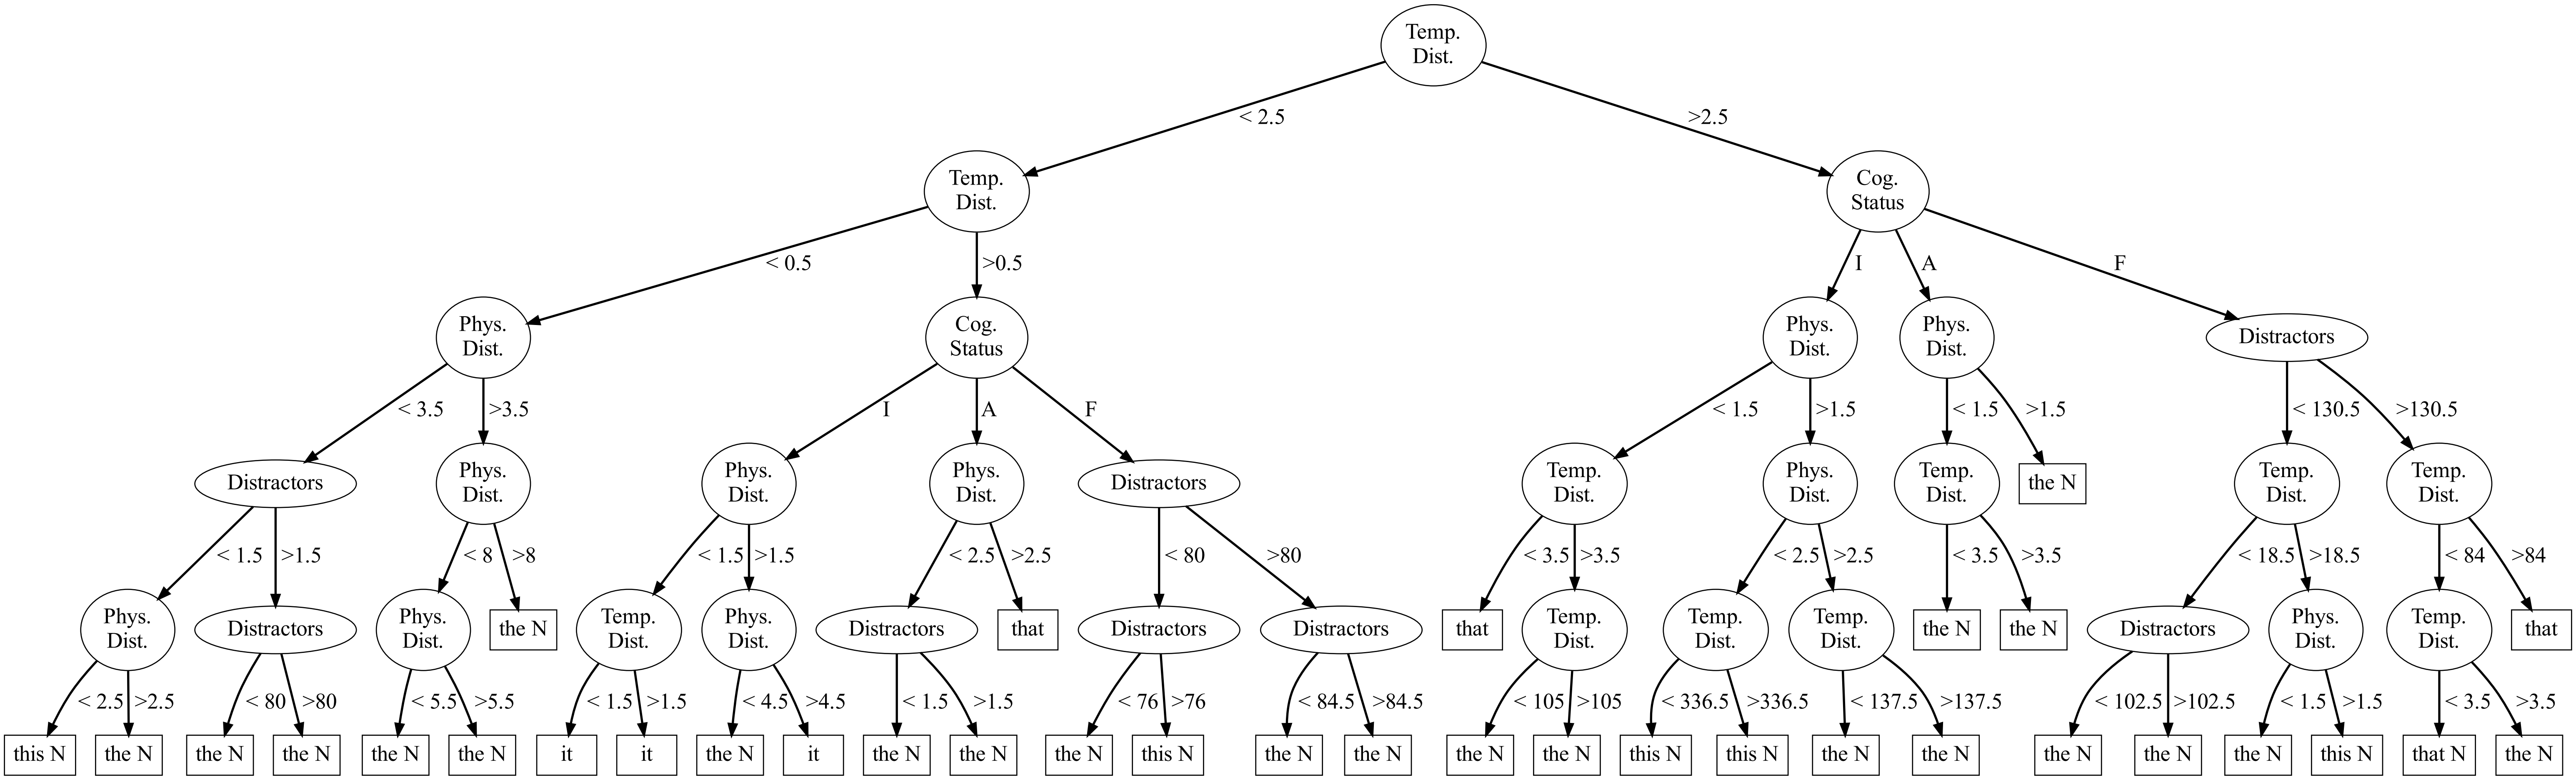

Supplement: software [file tree-M1.pdf › weka-dt/output/6-d5-noprune/tree-M1.pdf]

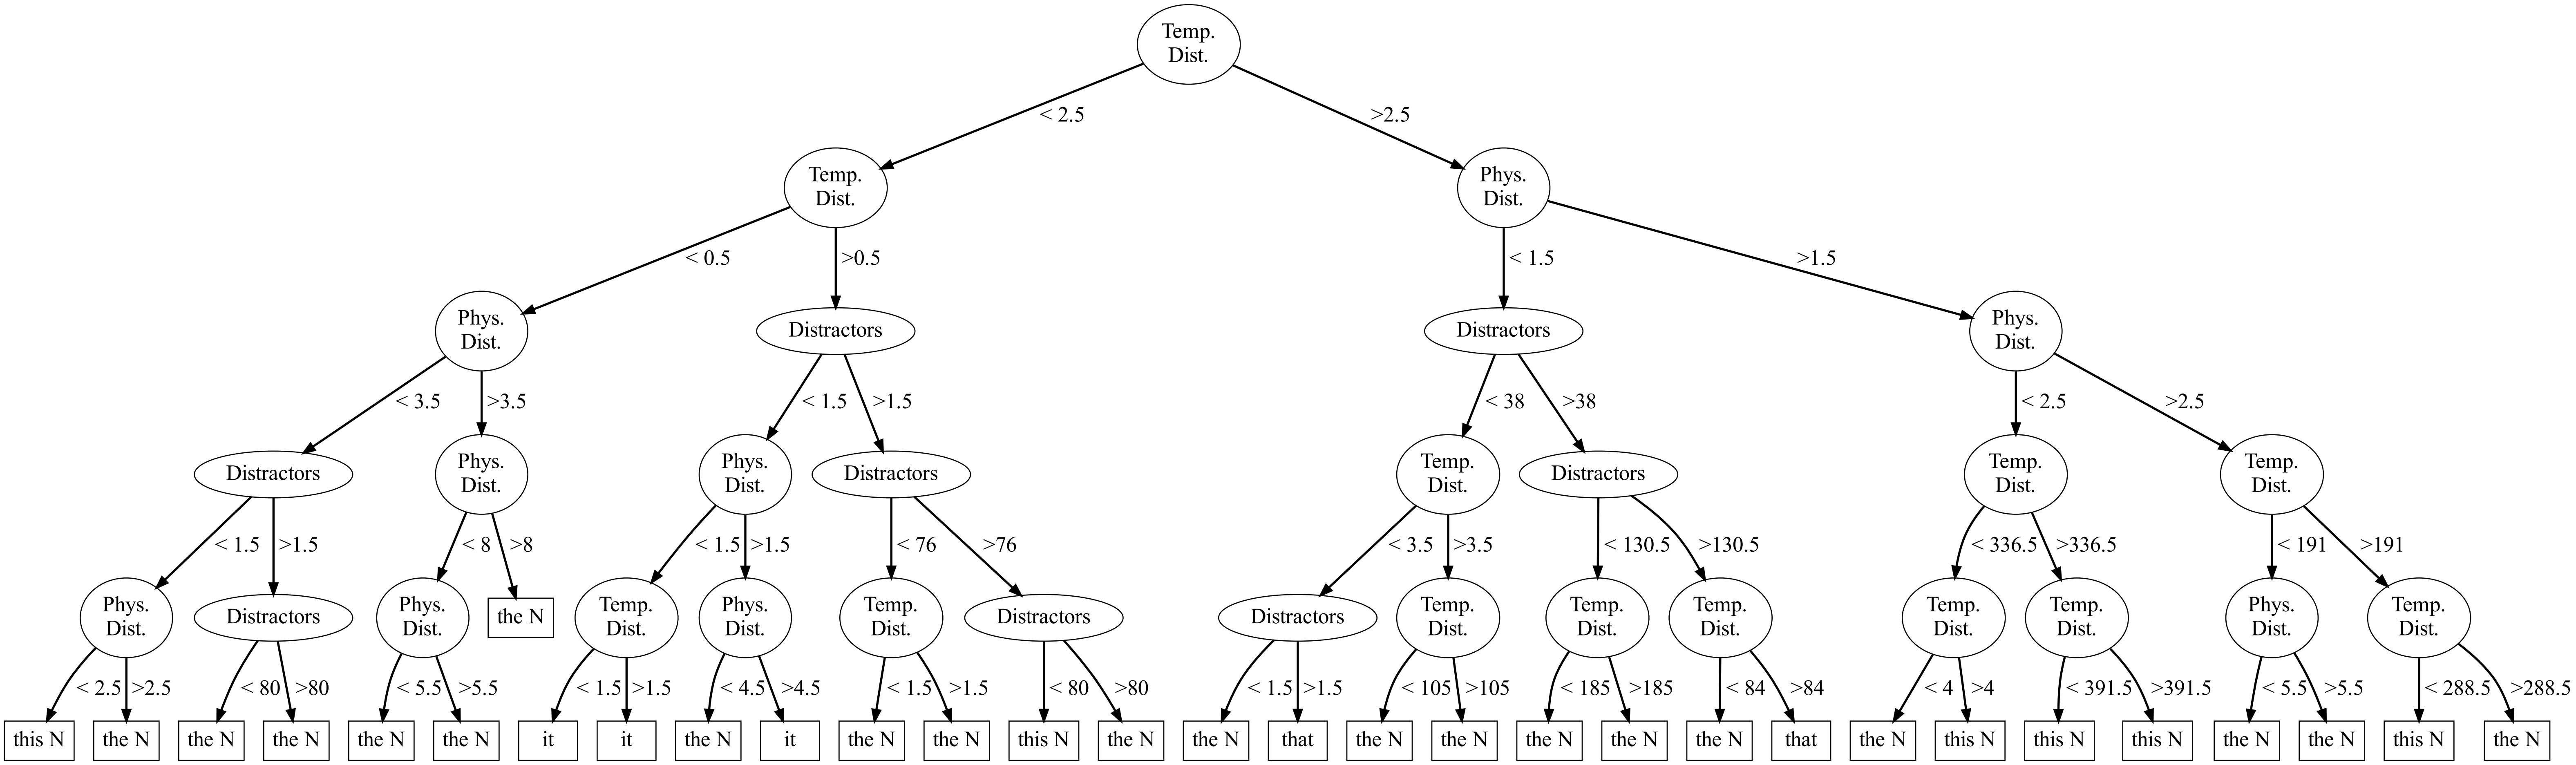

Supplement: software [file tree-M2.pdf › weka-dt/output/6-d5-noprune/tree-M2.pdf]

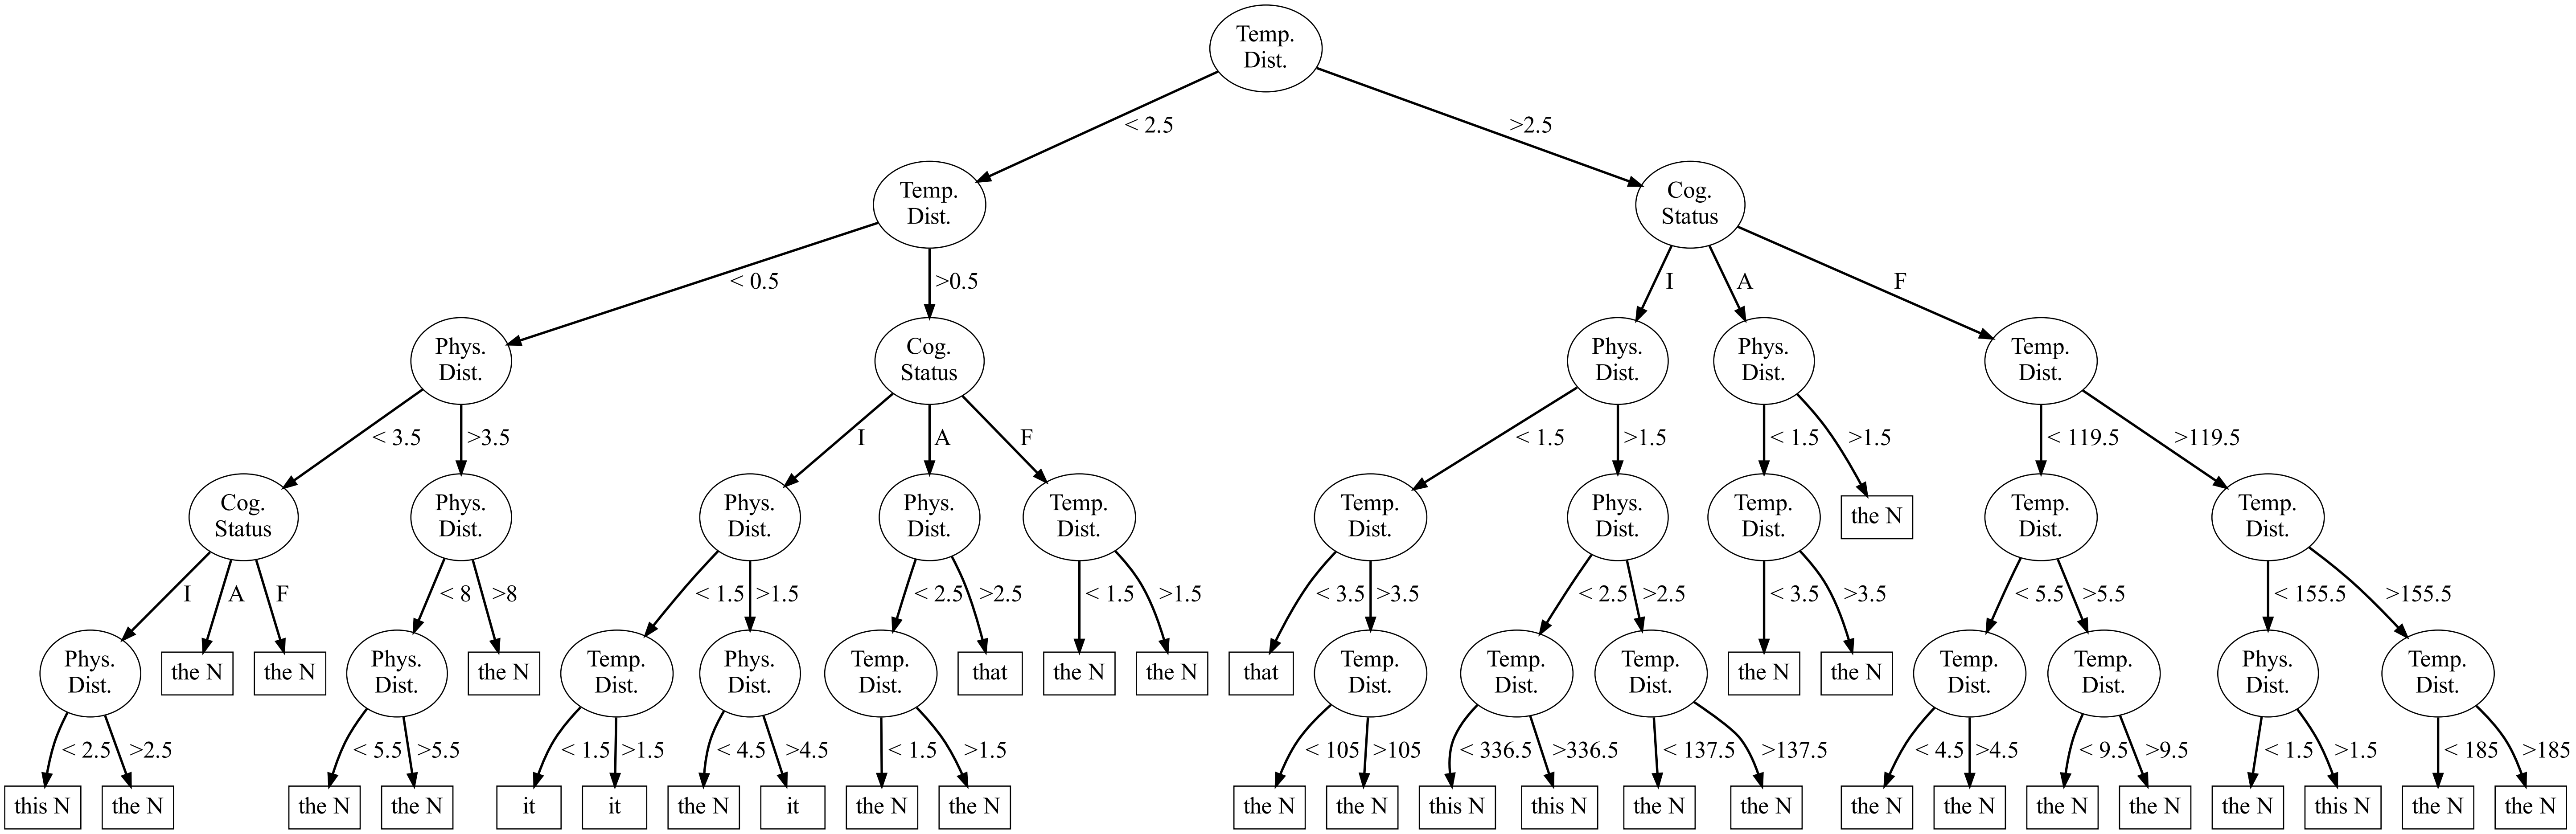

Supplement: software [file tree-M3.pdf › weka-dt/output/6-d5-noprune/tree-M3.pdf]

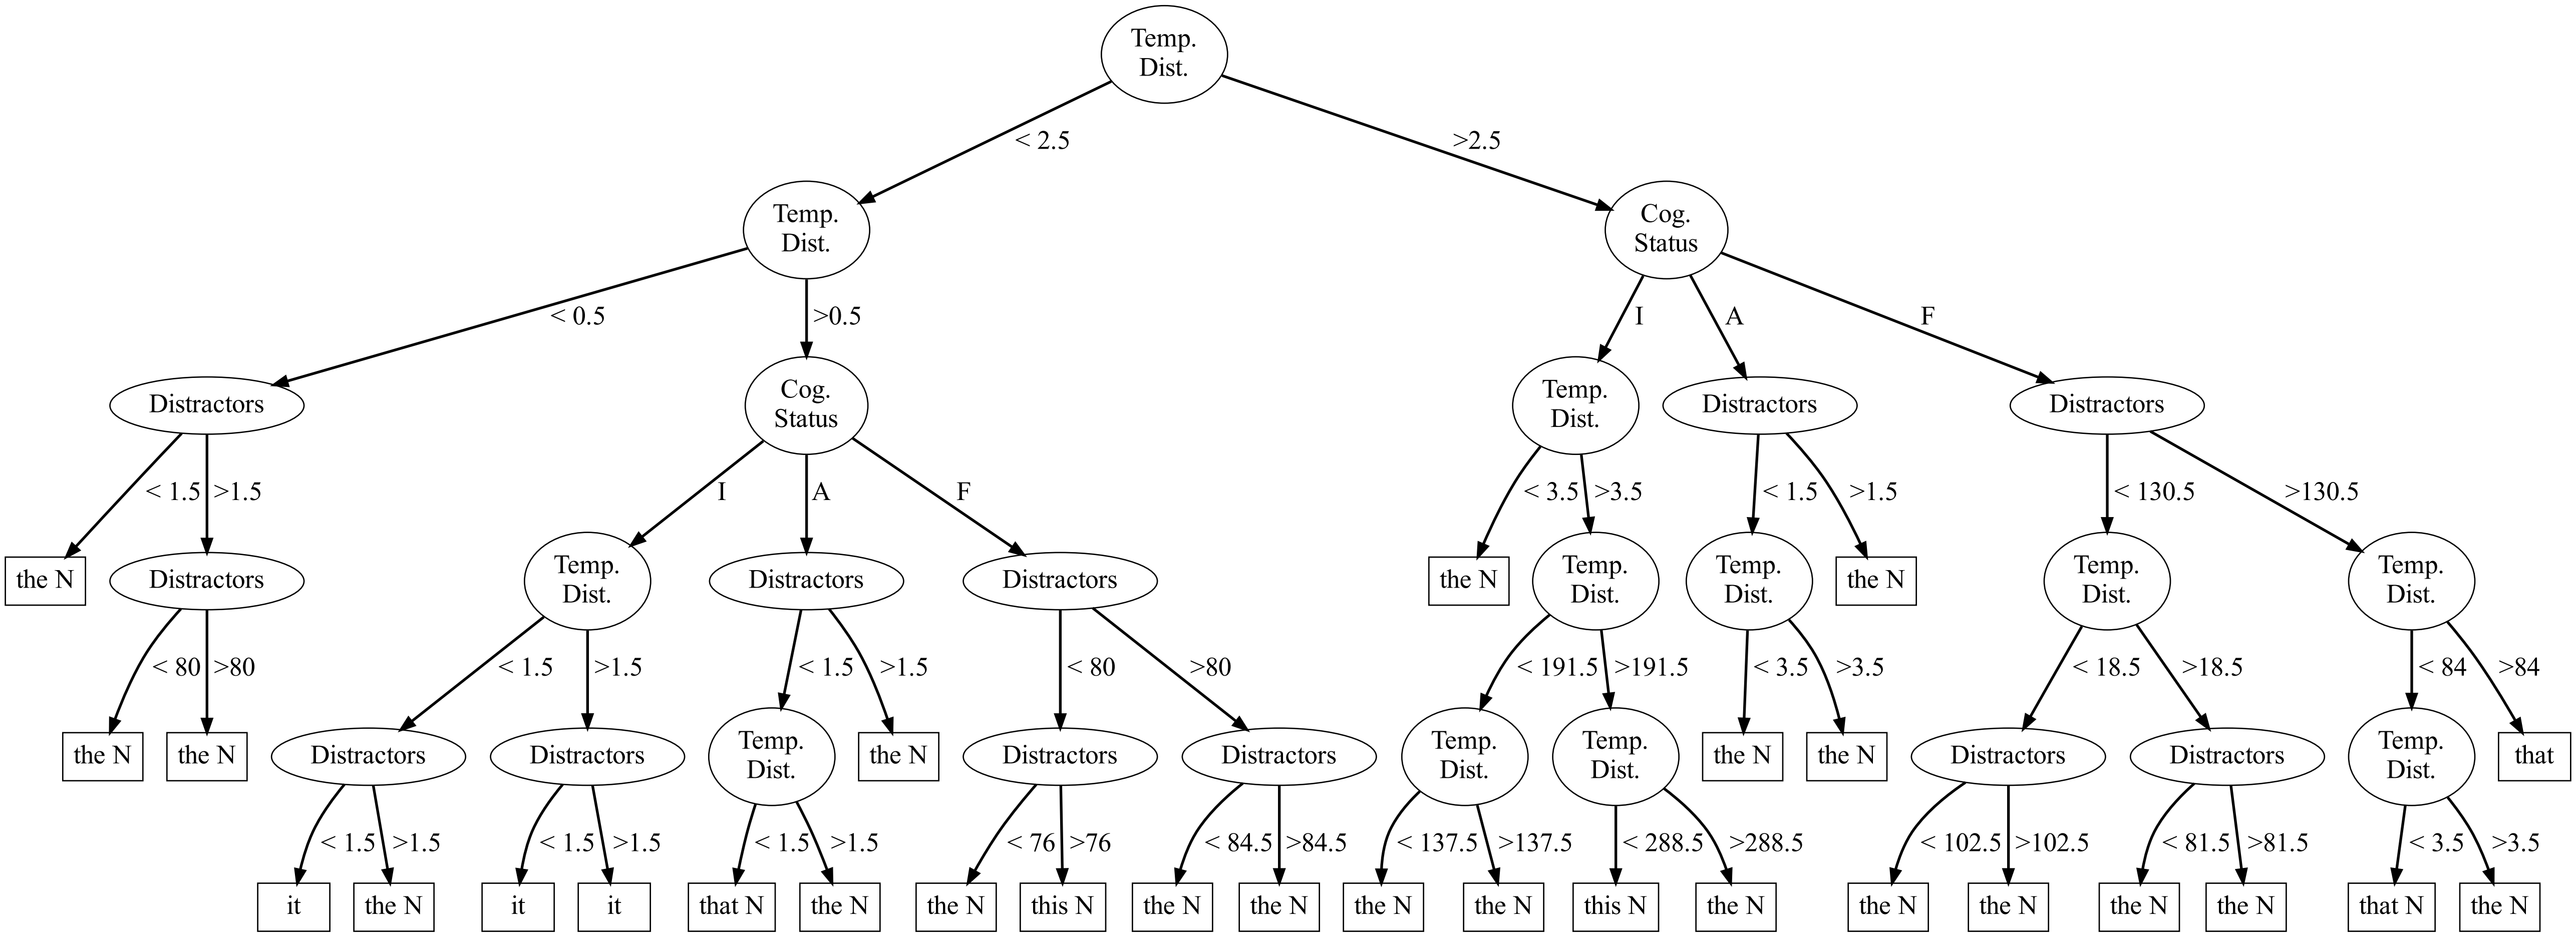

Supplement: software [file tree-M4.pdf › weka-dt/output/6-d5-noprune/tree-M4.pdf]

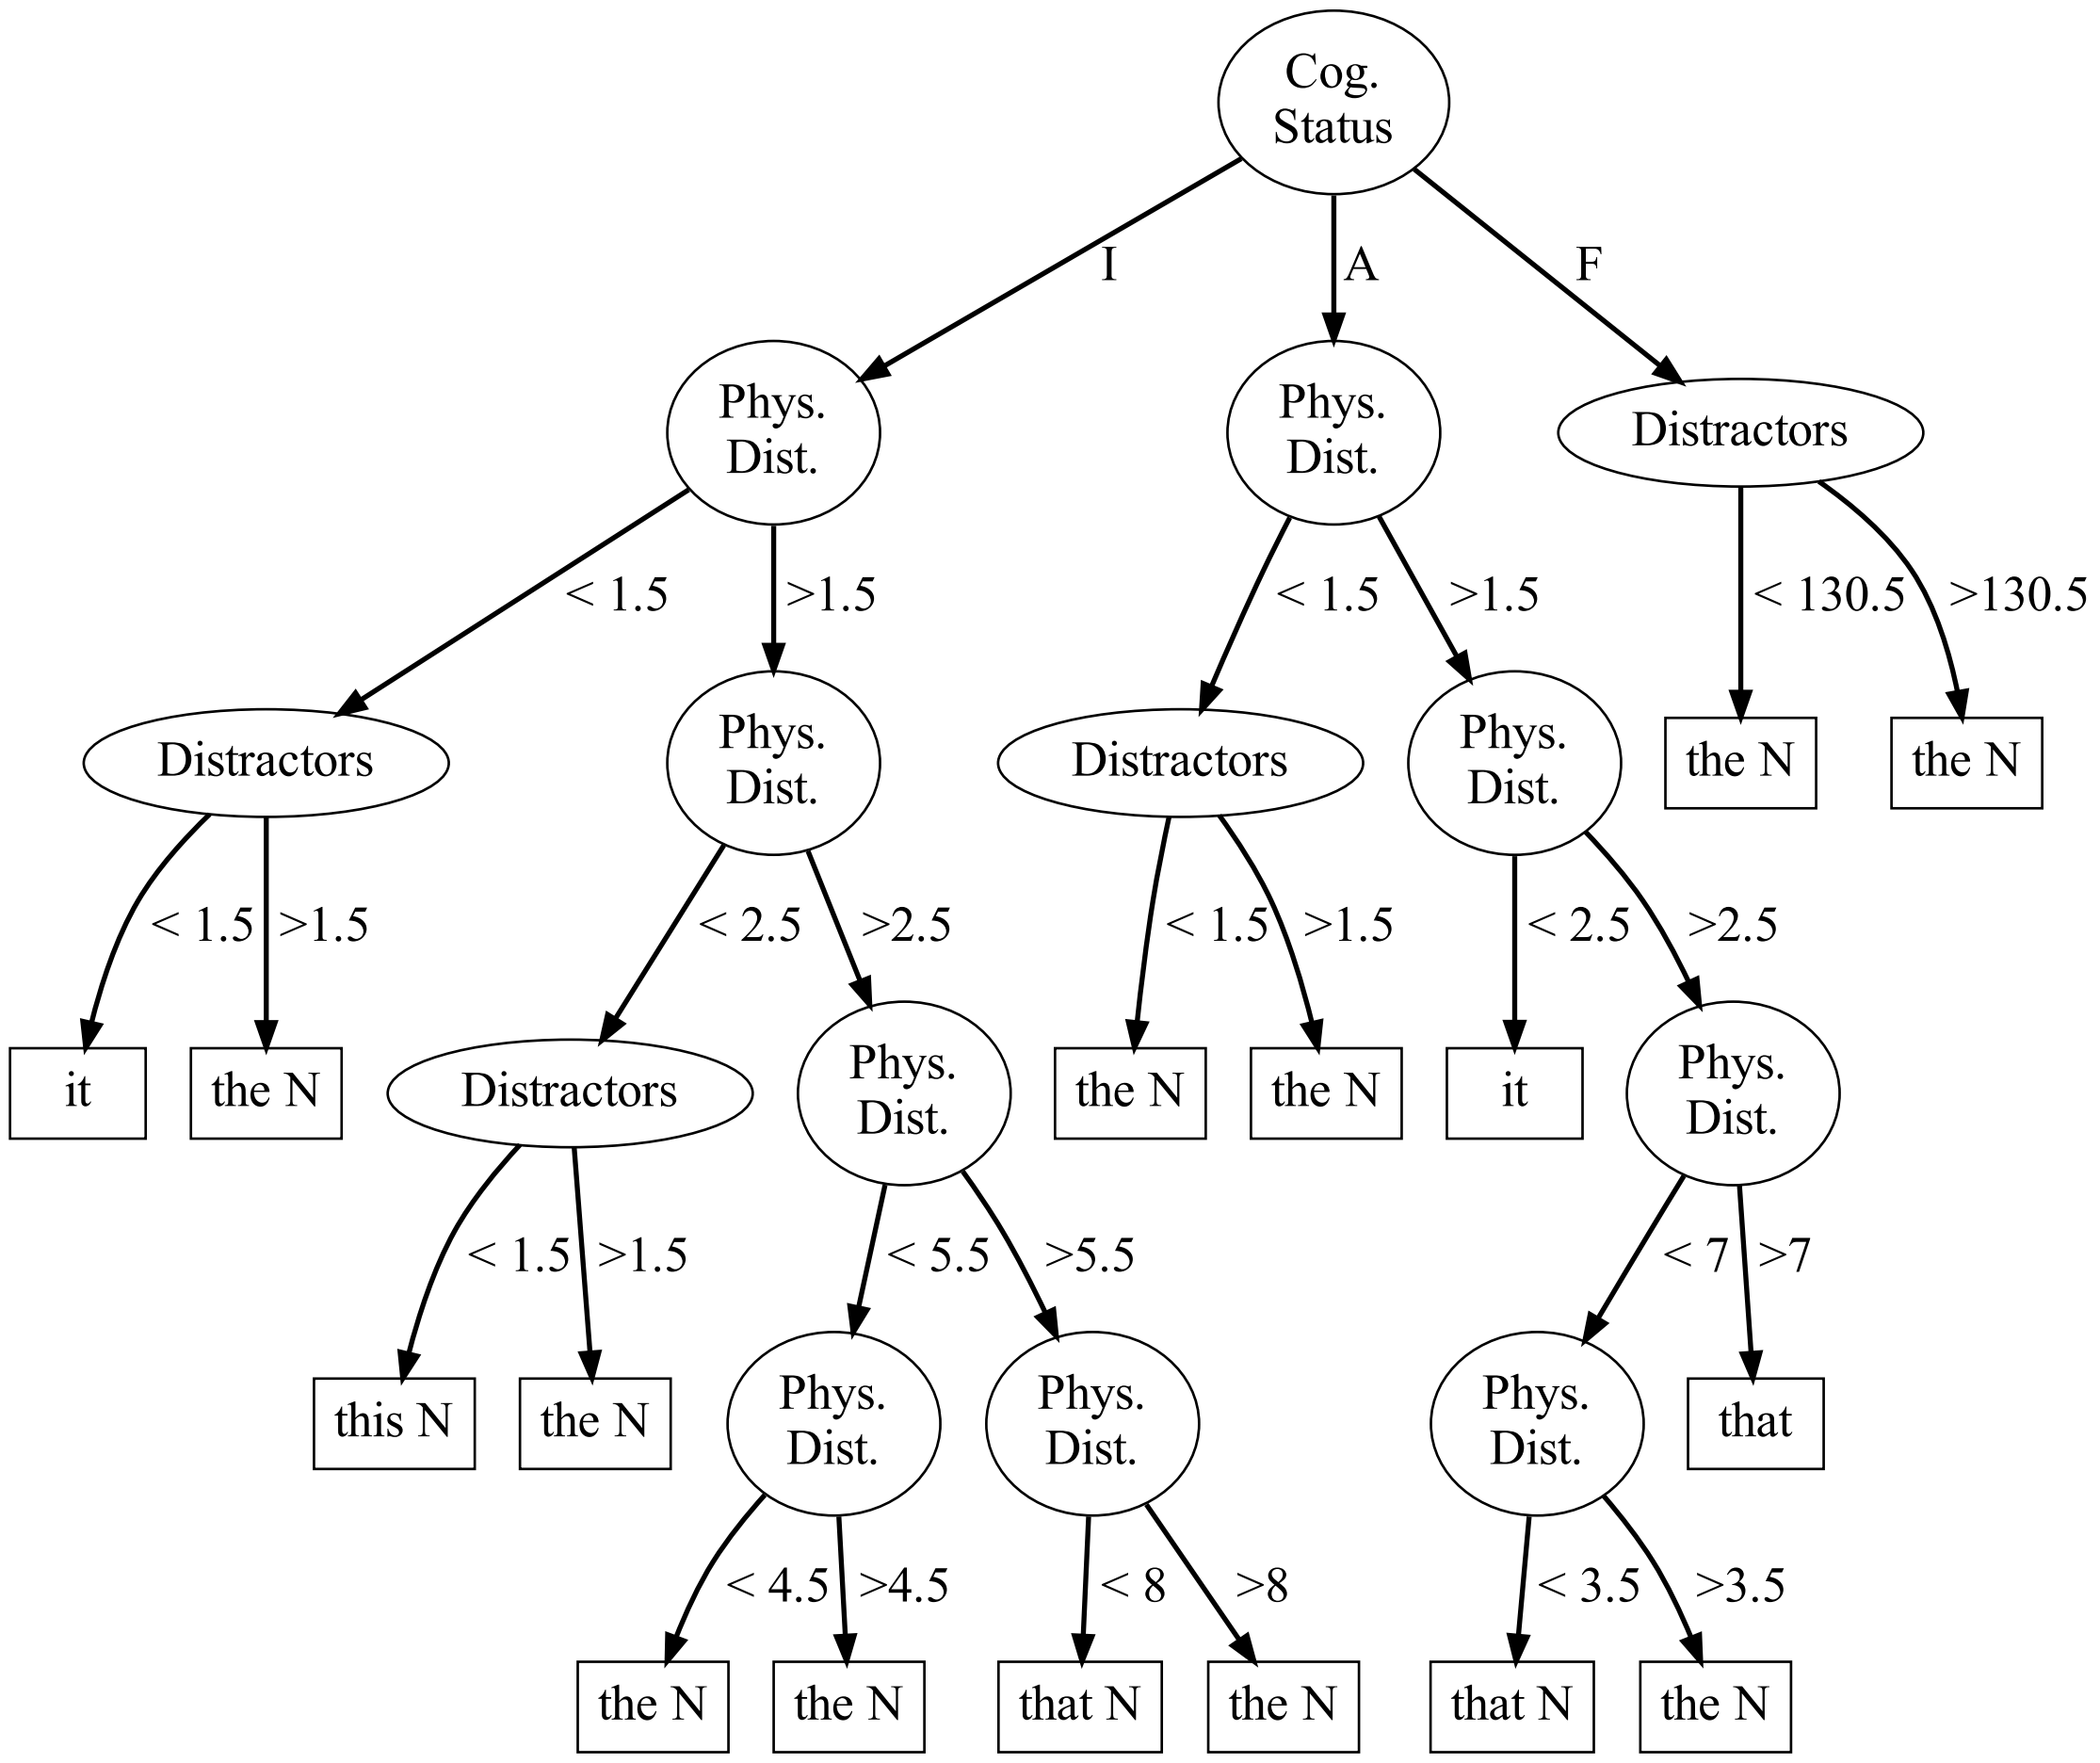

Supplement: software [file tree-M5.pdf › weka-dt/output/6-d5-noprune/tree-M5.pdf]

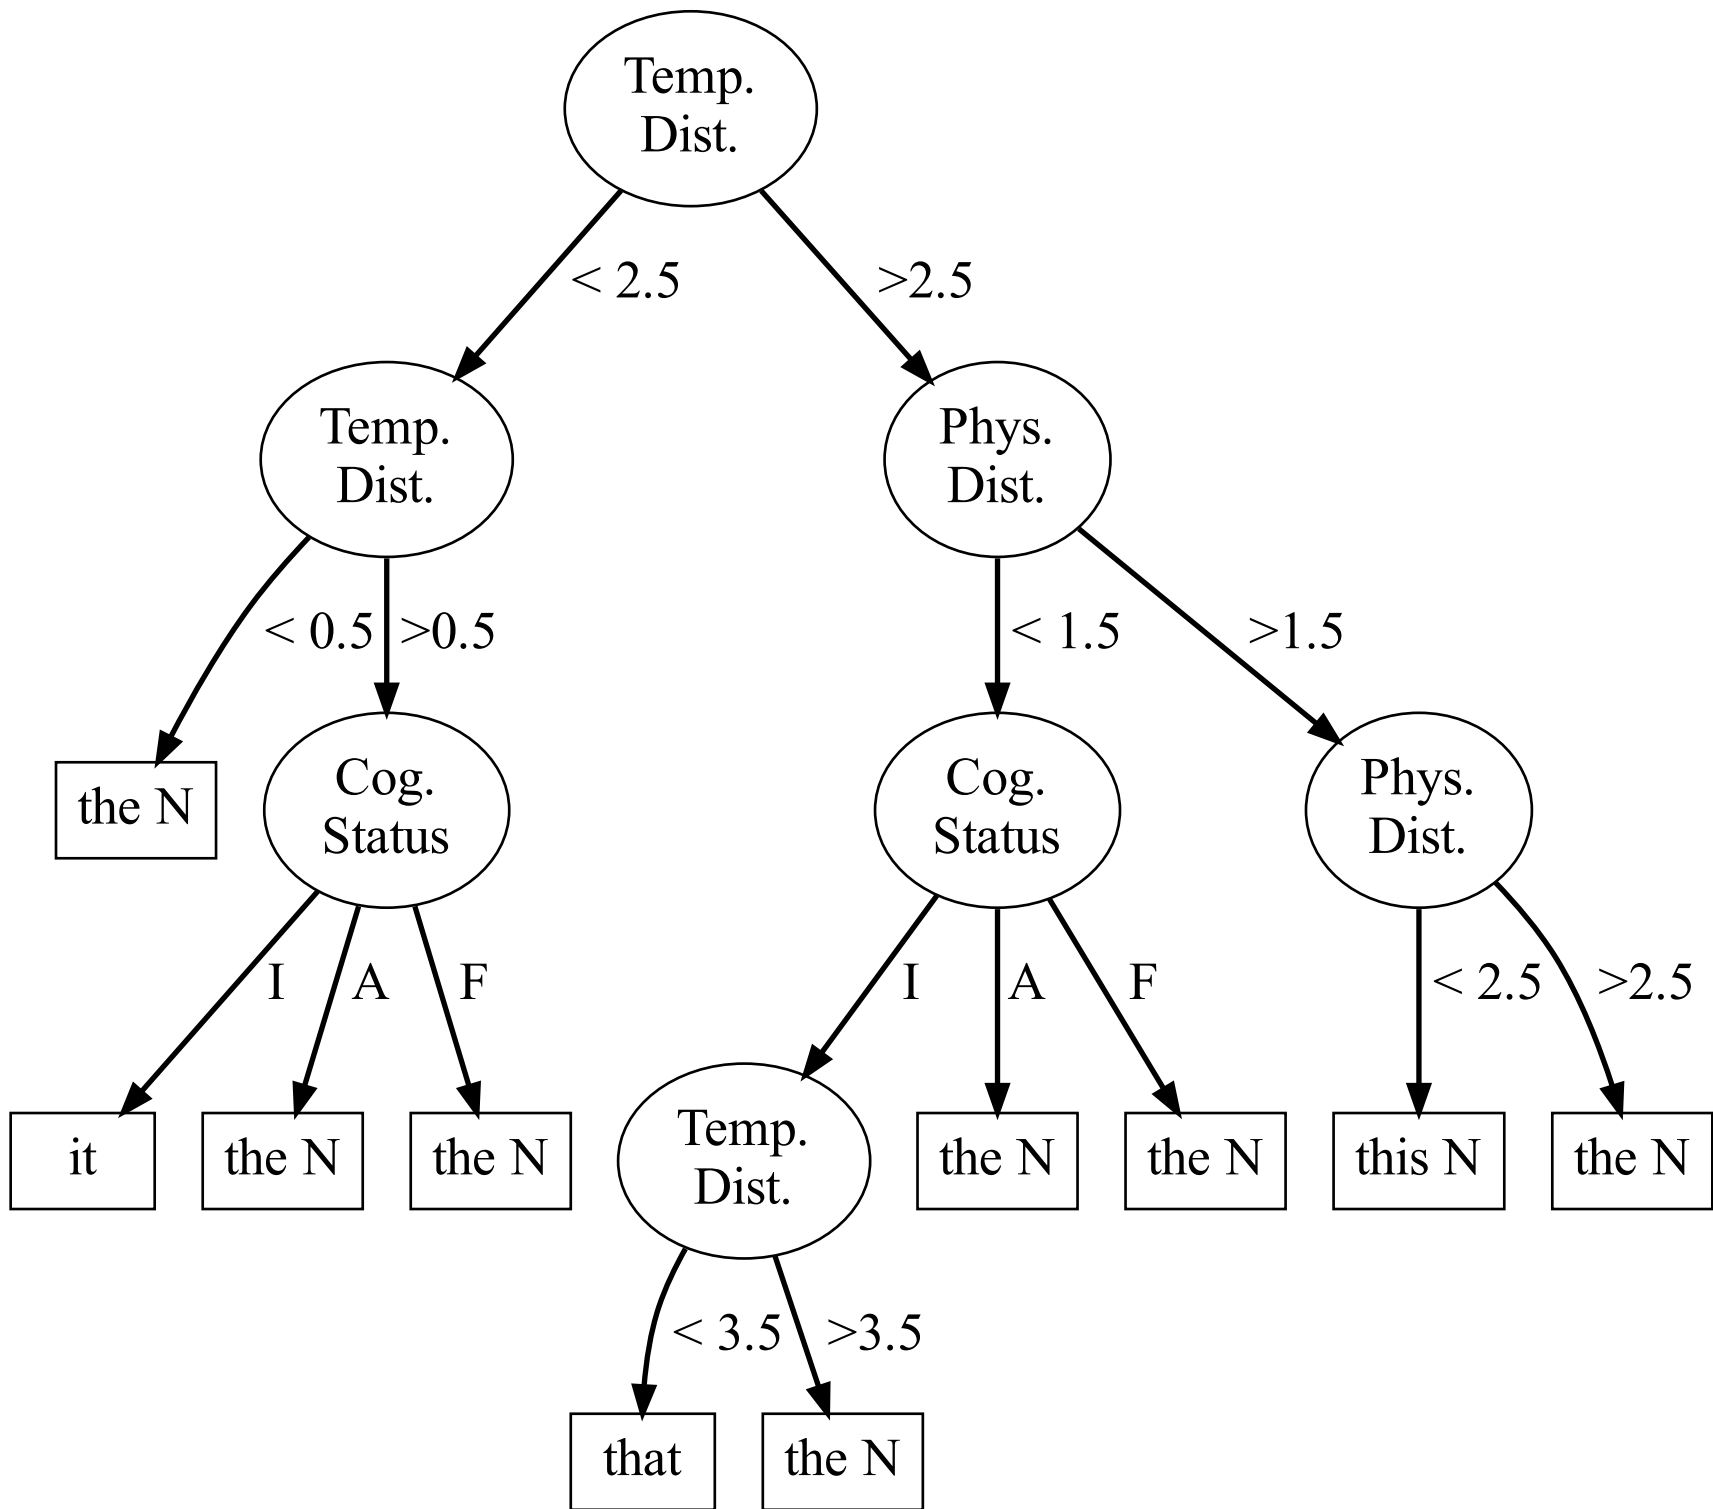

Supplement: software [file tree-M1.pdf › weka-dt/output/6-d5-prune/tree-M1.pdf]

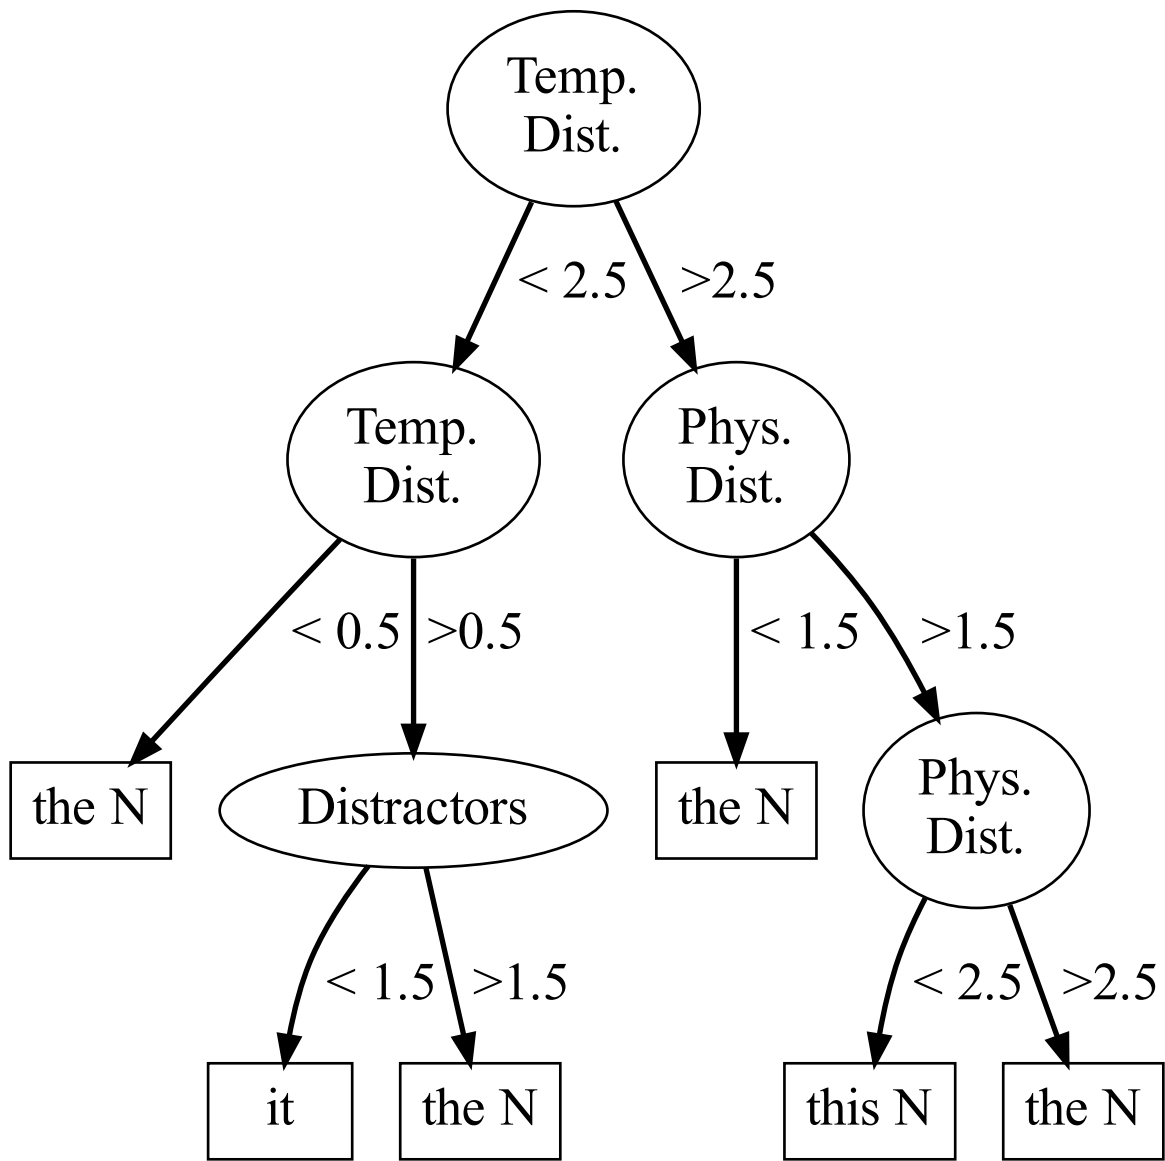

Supplement: software [file tree-M2.pdf › weka-dt/output/6-d5-prune/tree-M2.pdf]

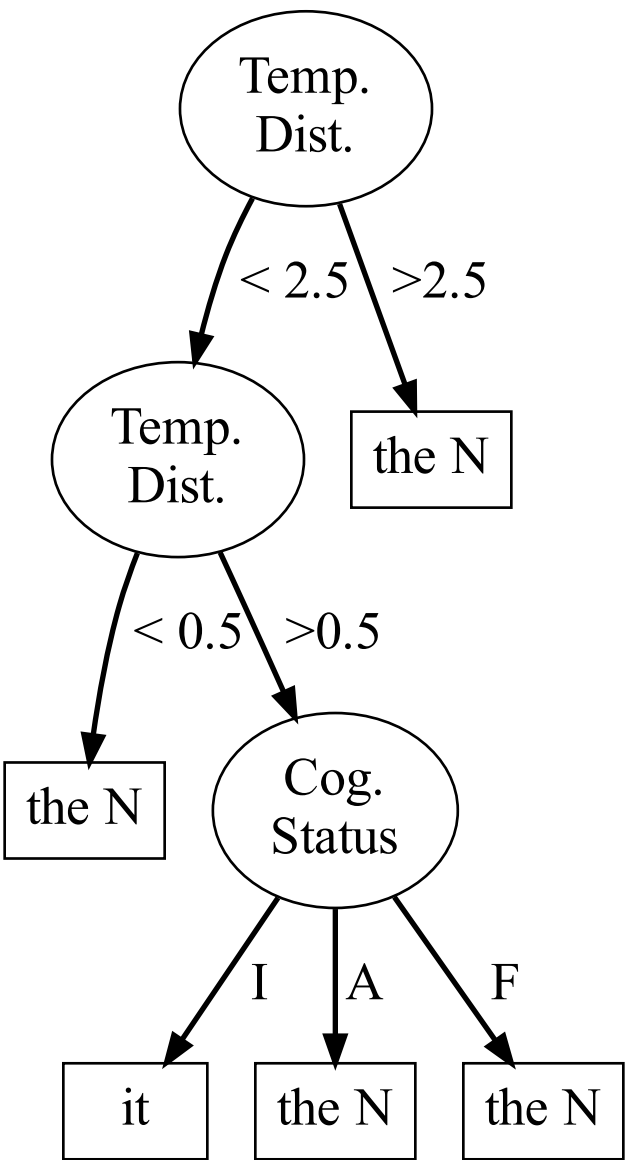

Supplement: software [file tree-M4.pdf › weka-dt/output/6-d5-prune/tree-M4.pdf]

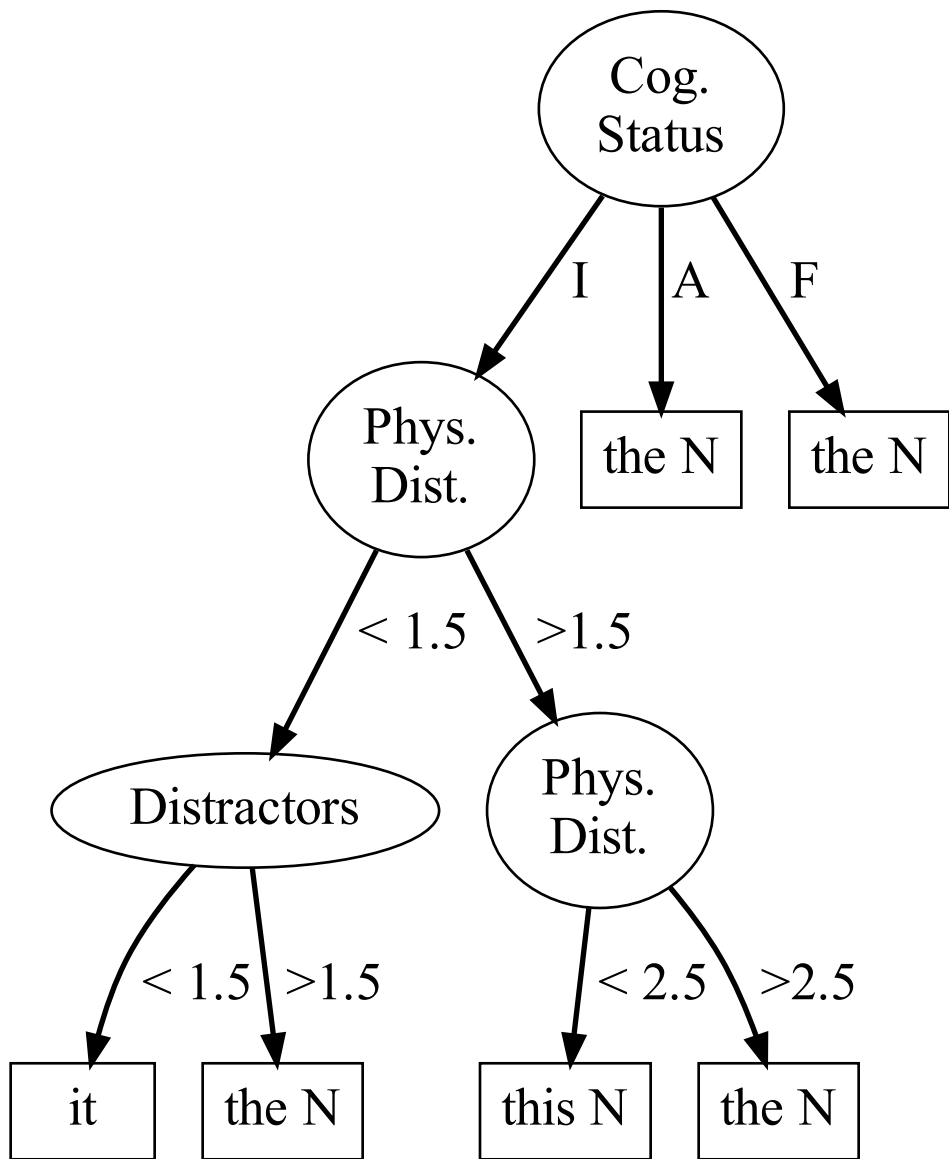

Supplement: software [file tree-M5.pdf › weka-dt/output/6-d5-prune/tree-M5.pdf]

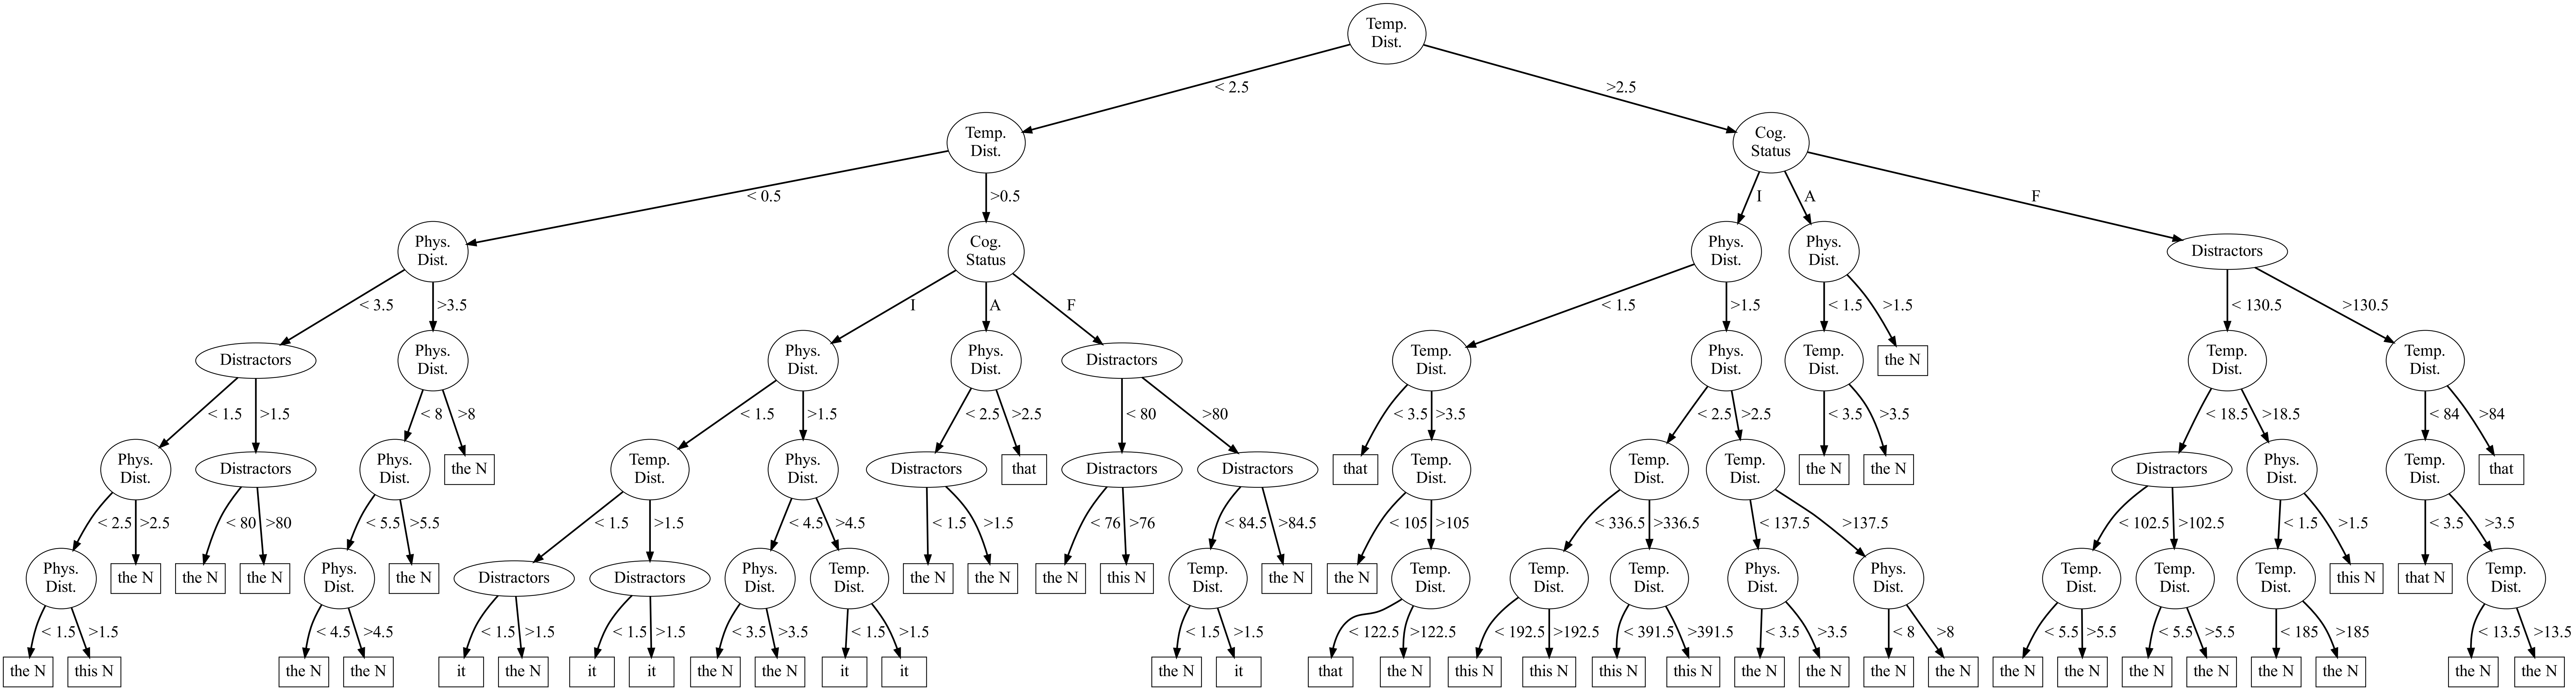

Supplement: software [file tree-M1.pdf › weka-dt/output/6-d6-noprune/tree-M1.pdf]

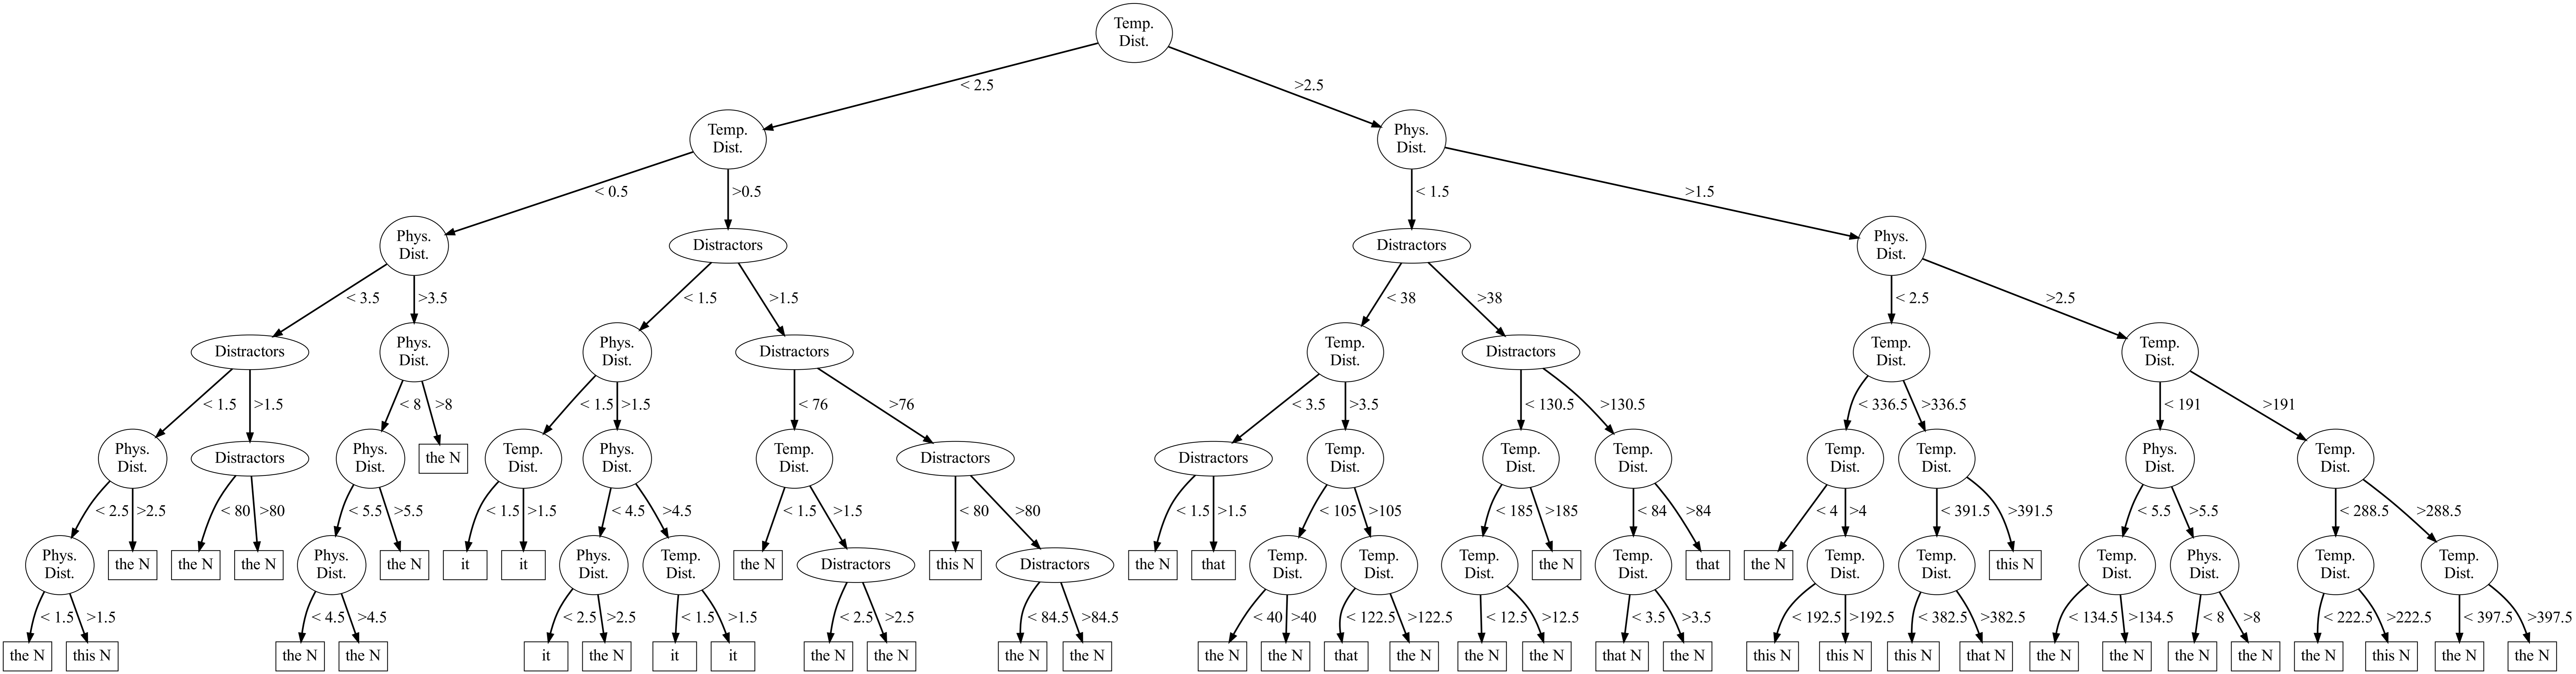

Supplement: software [file tree-M2.pdf › weka-dt/output/6-d6-noprune/tree-M2.pdf]

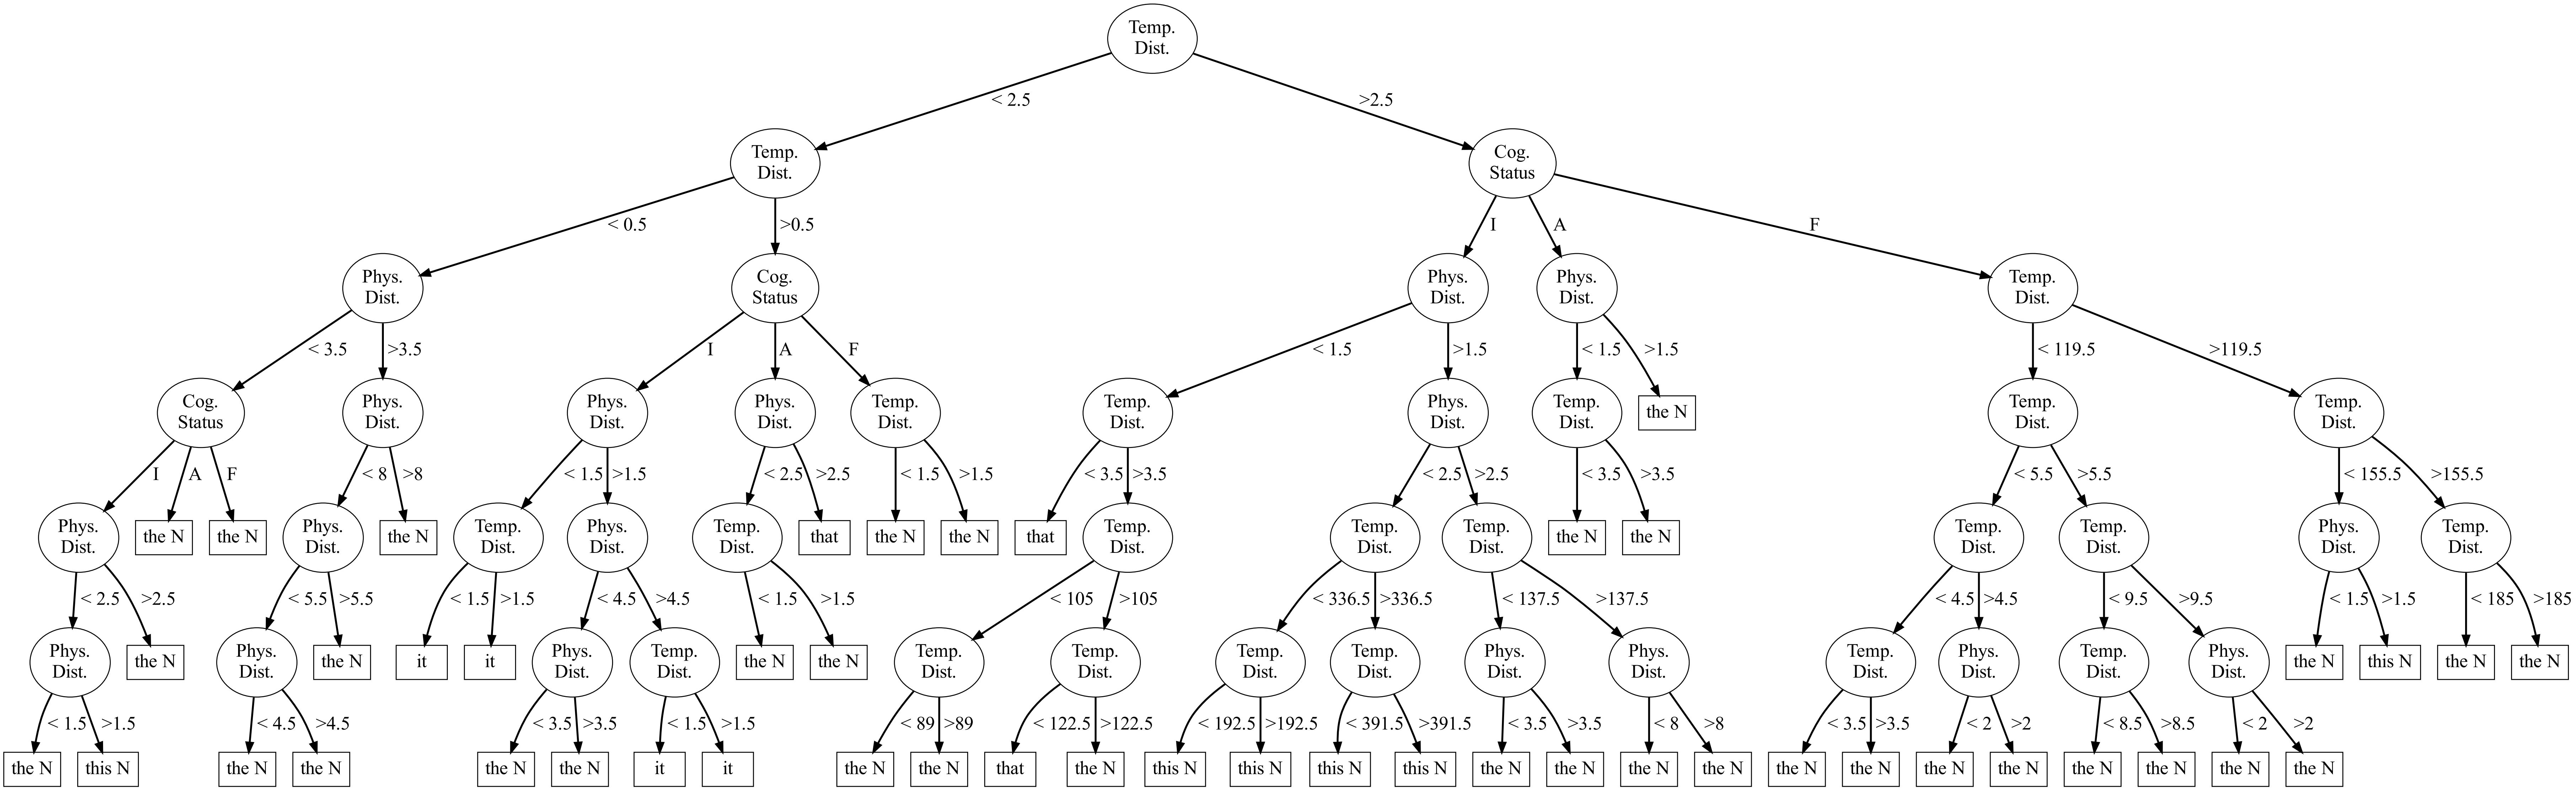

Supplement: software [file tree-M3.pdf › weka-dt/output/6-d6-noprune/tree-M3.pdf]

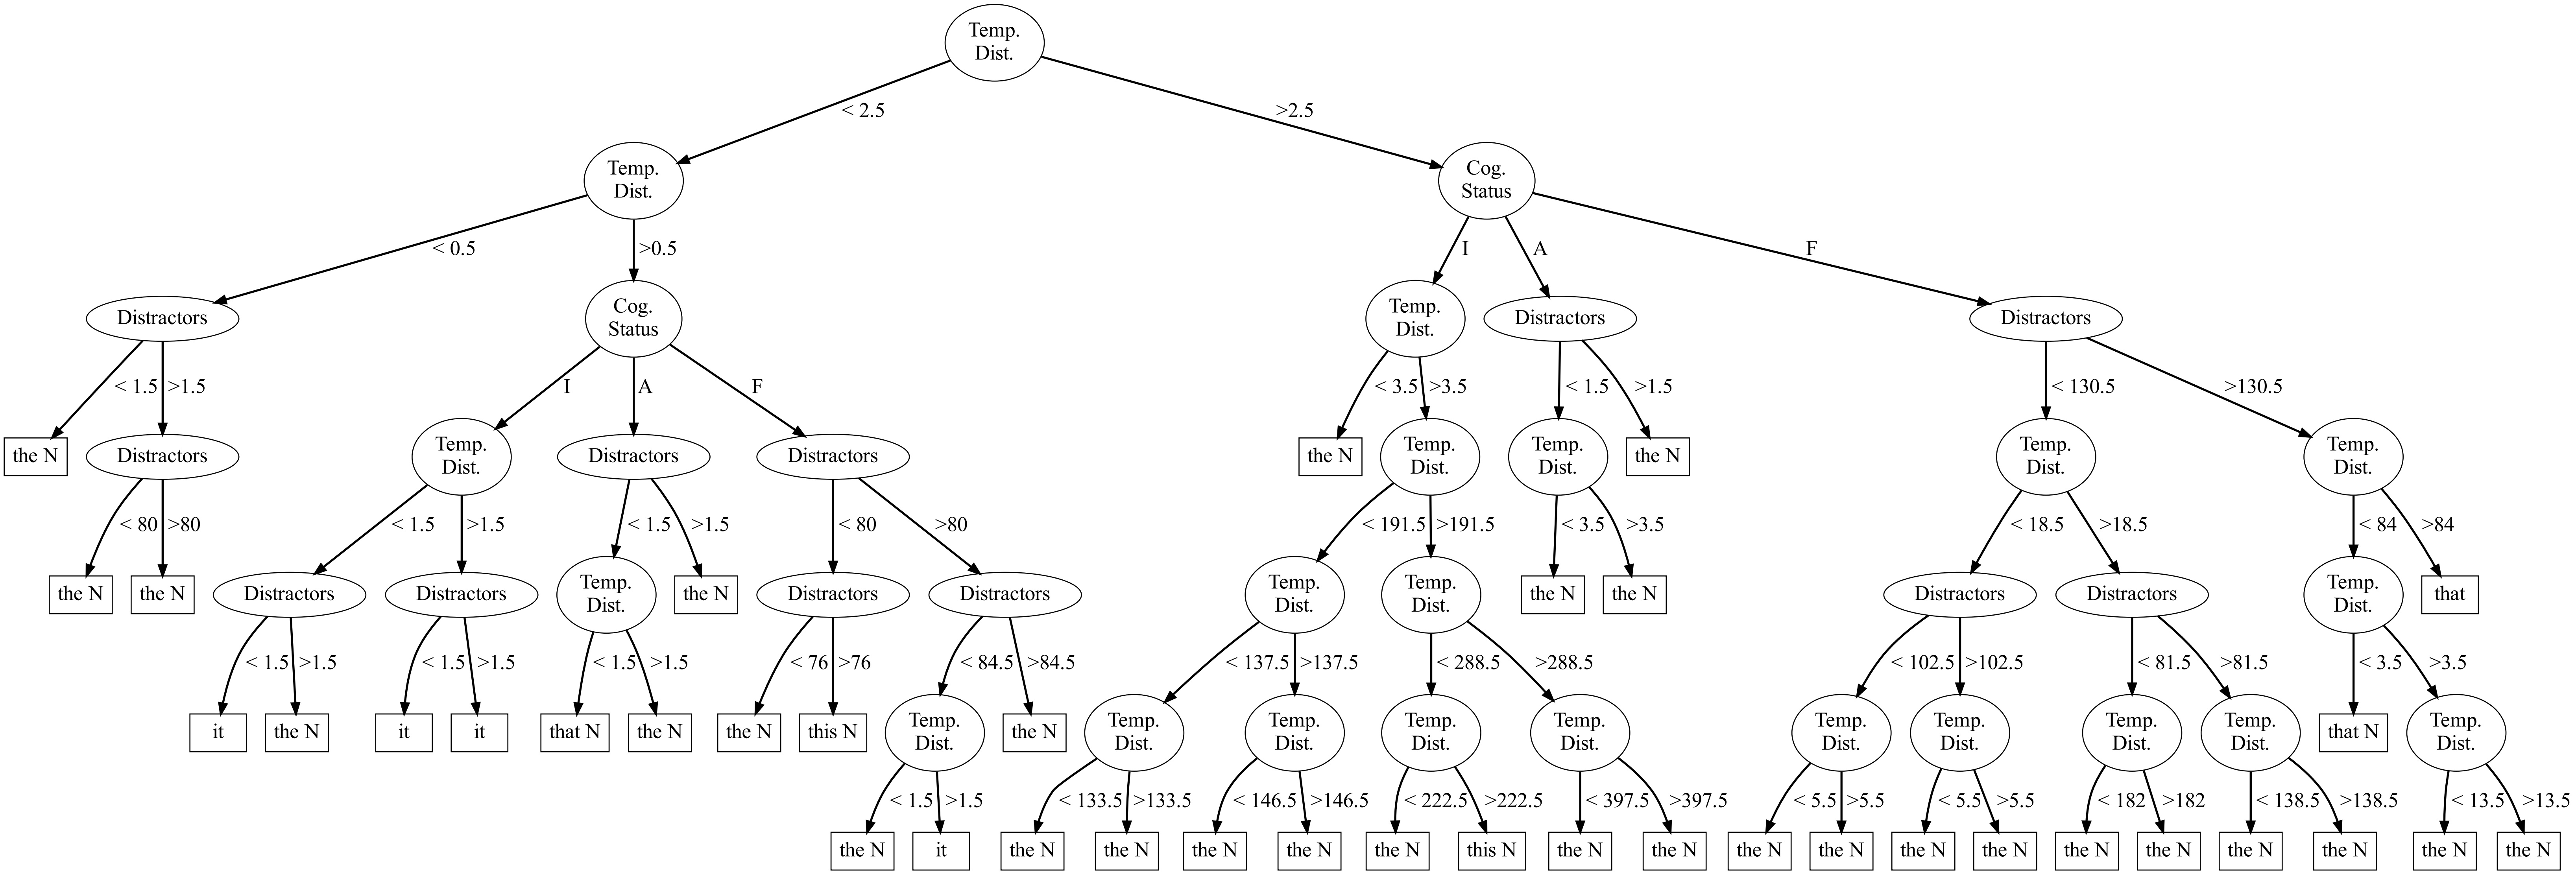

Supplement: software [file tree-M4.pdf › weka-dt/output/6-d6-noprune/tree-M4.pdf]

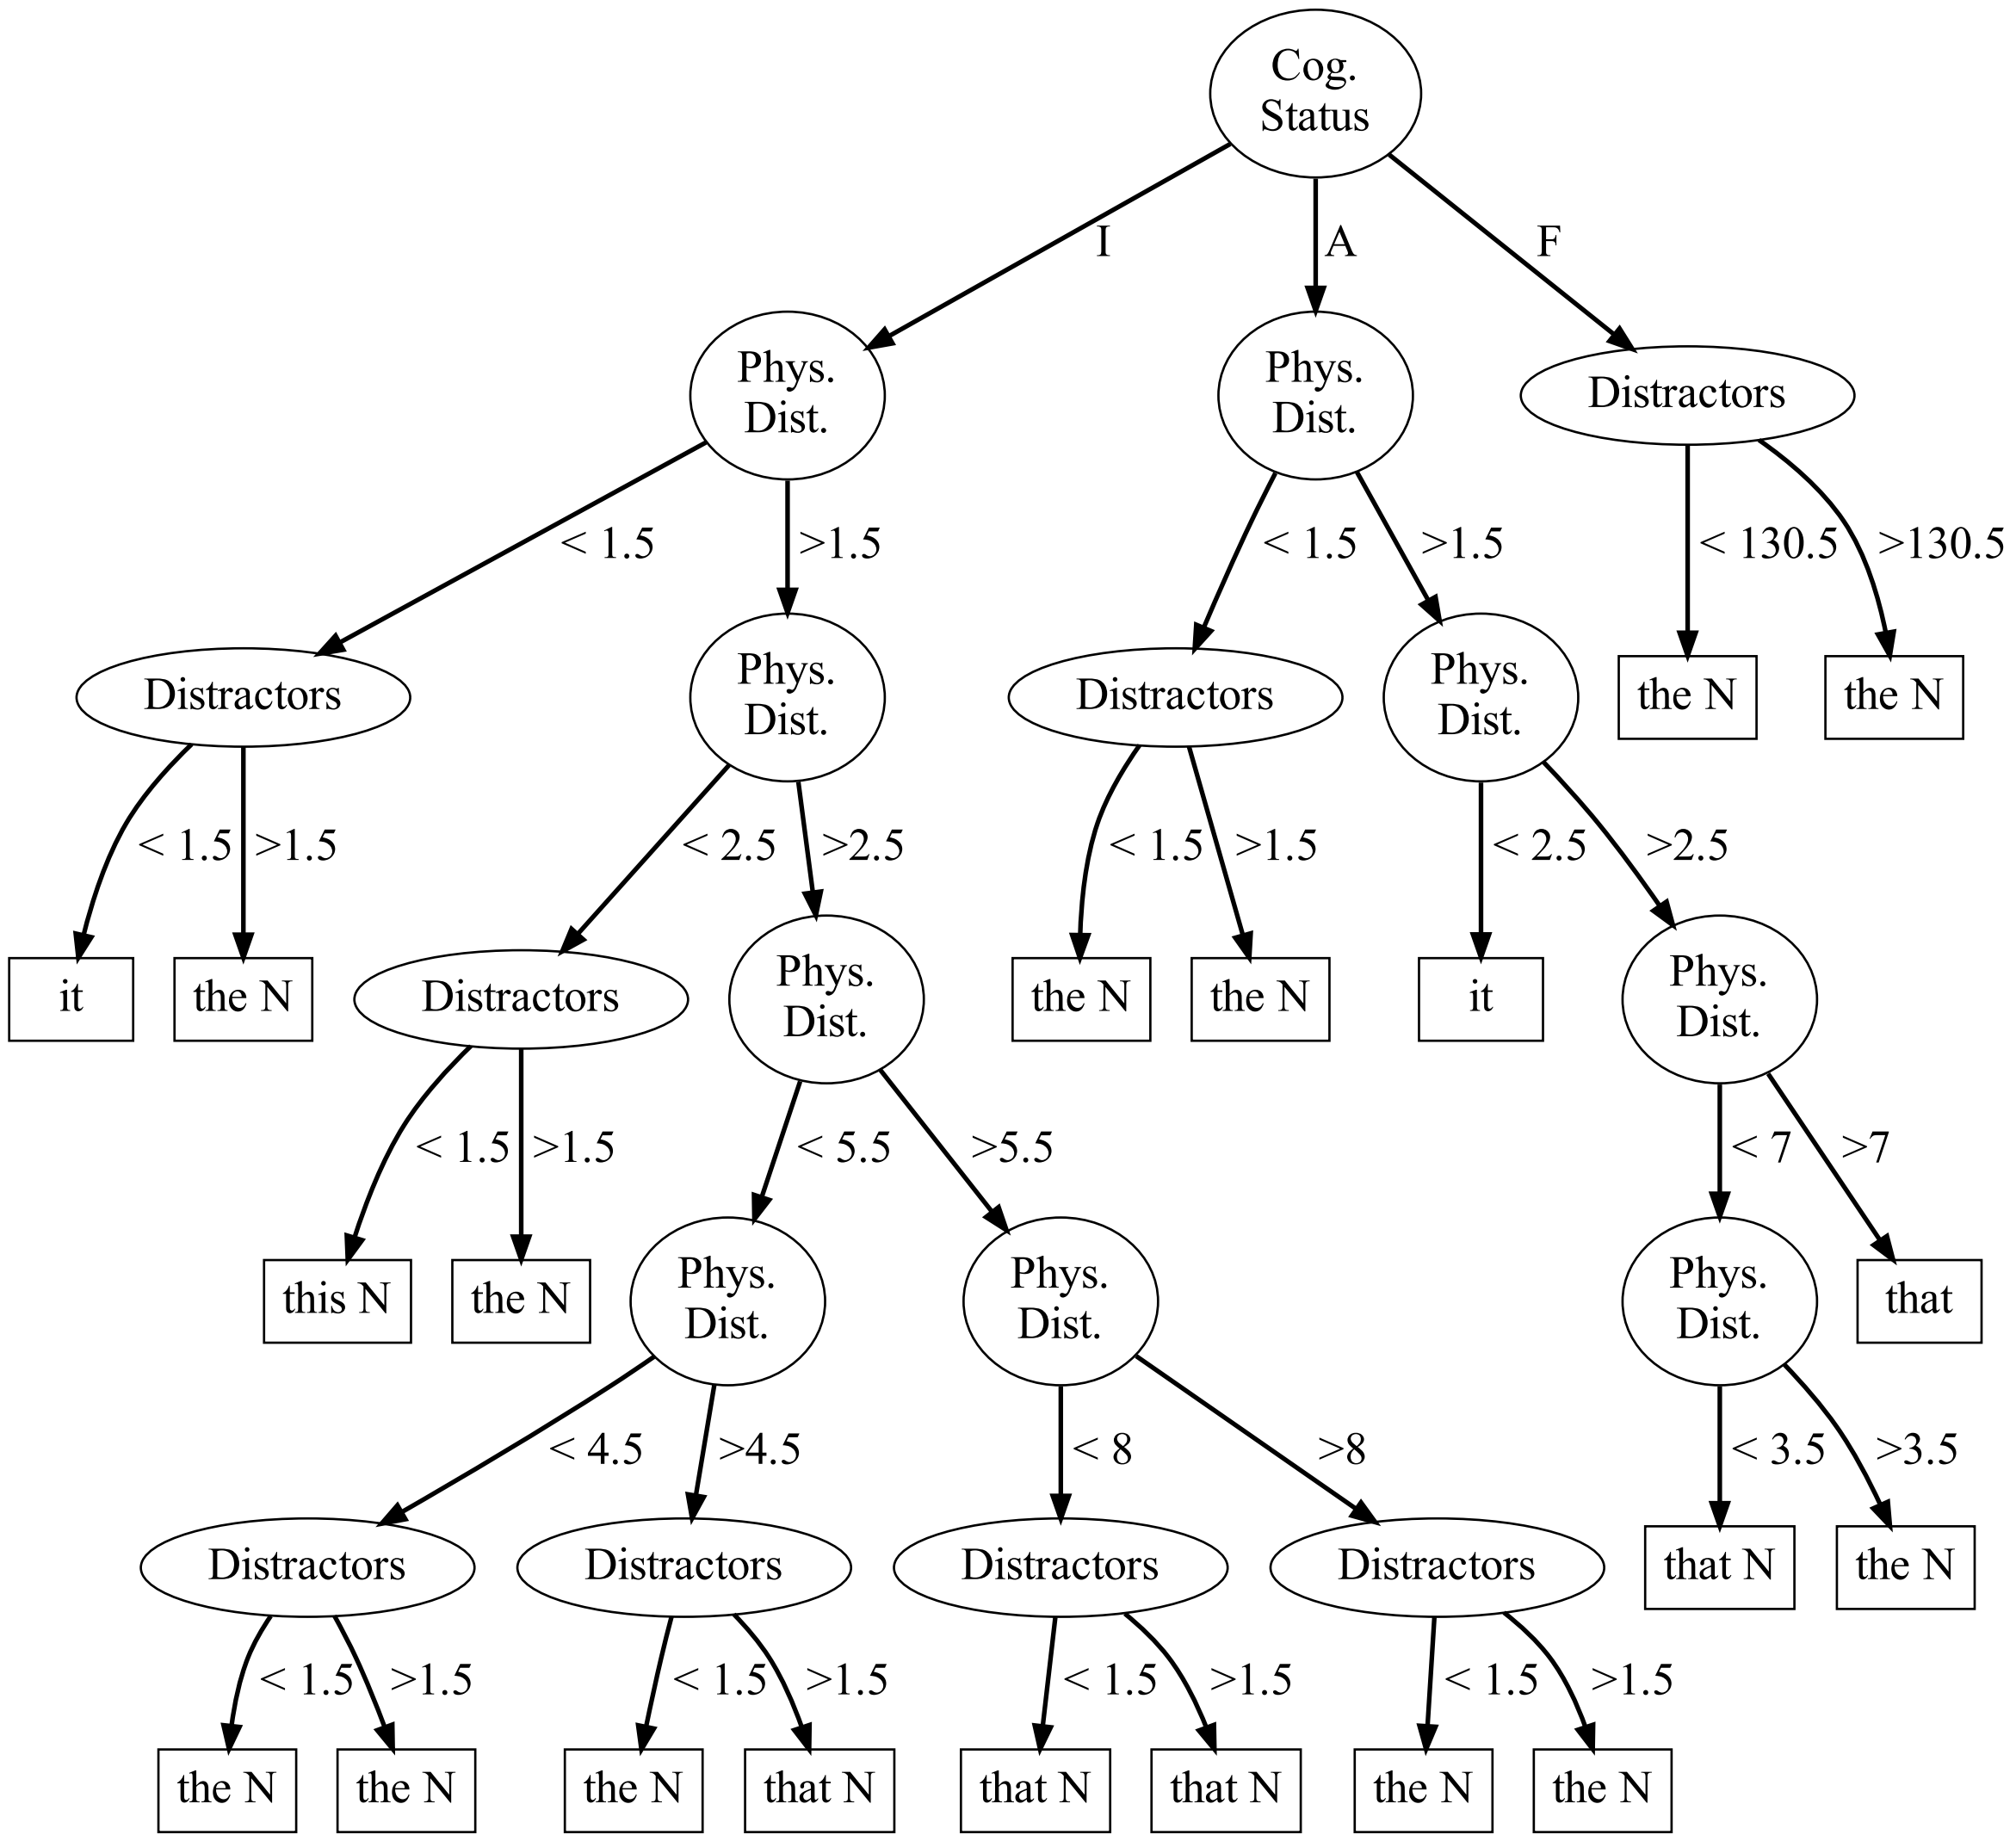

Supplement: software [file tree-M5.pdf › weka-dt/output/6-d6-noprune/tree-M5.pdf]

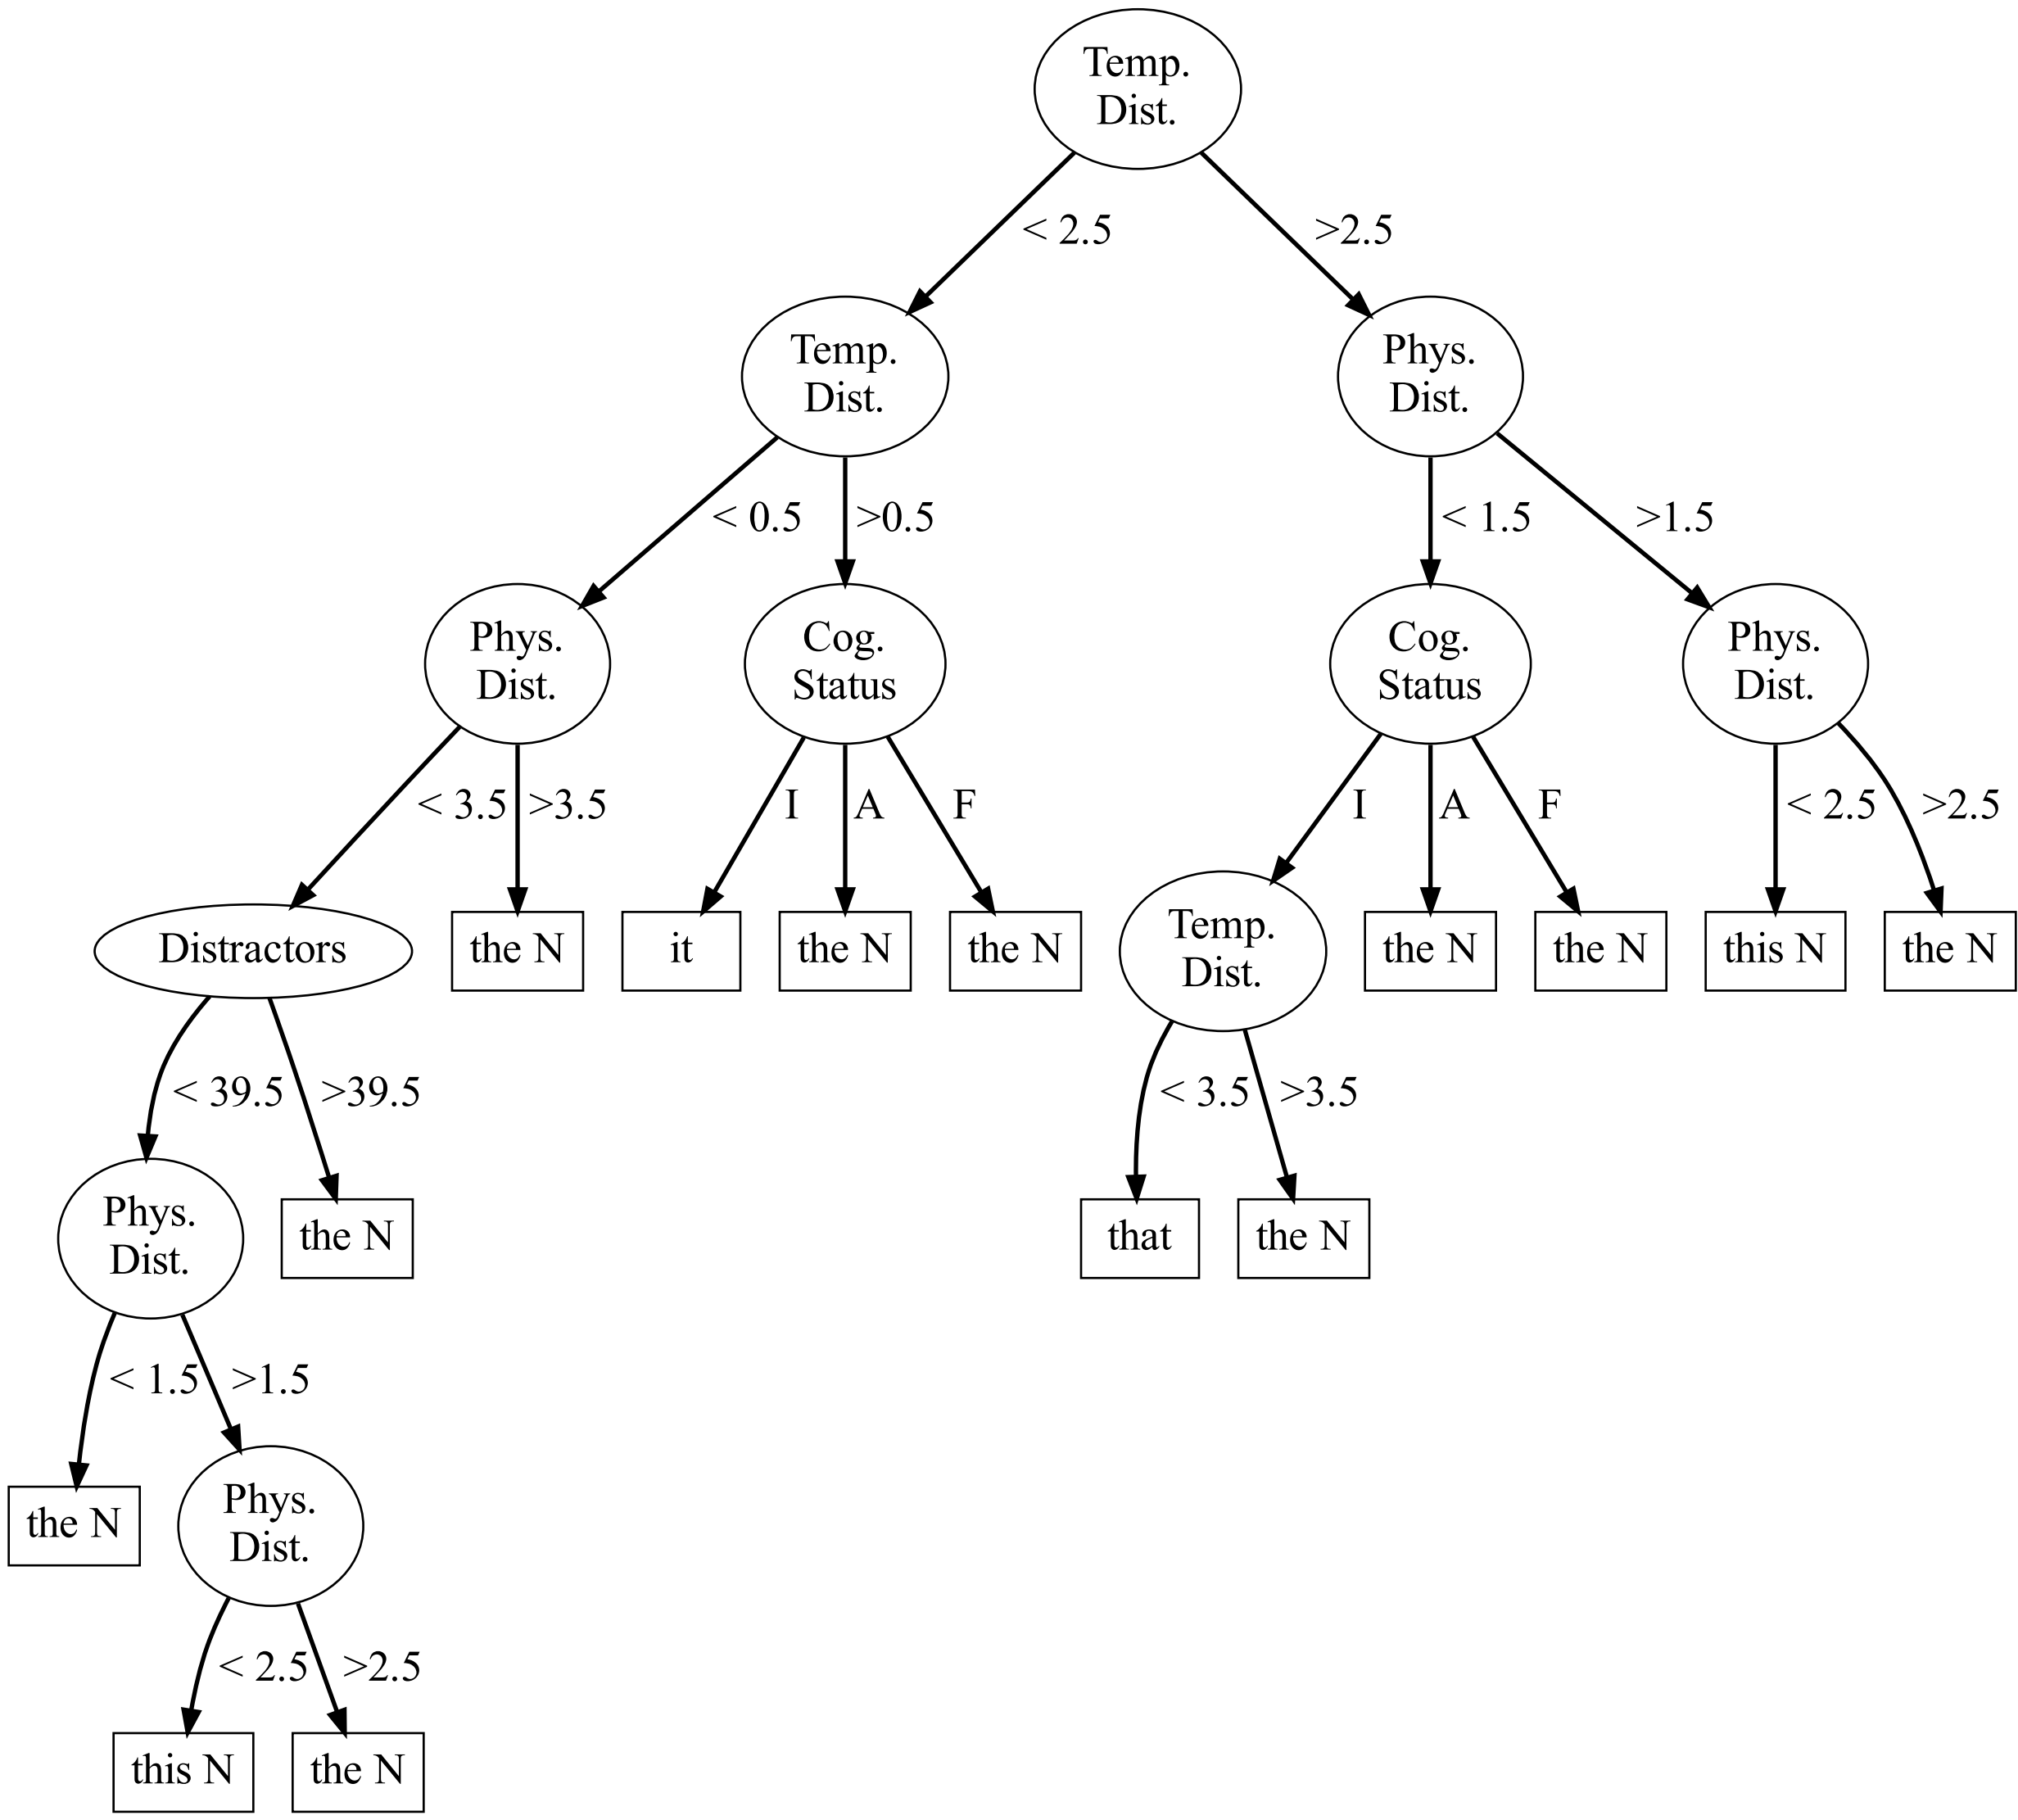

Supplement: software [file tree-M1.pdf › weka-dt/output/6-d6-prune/tree-M1.pdf]

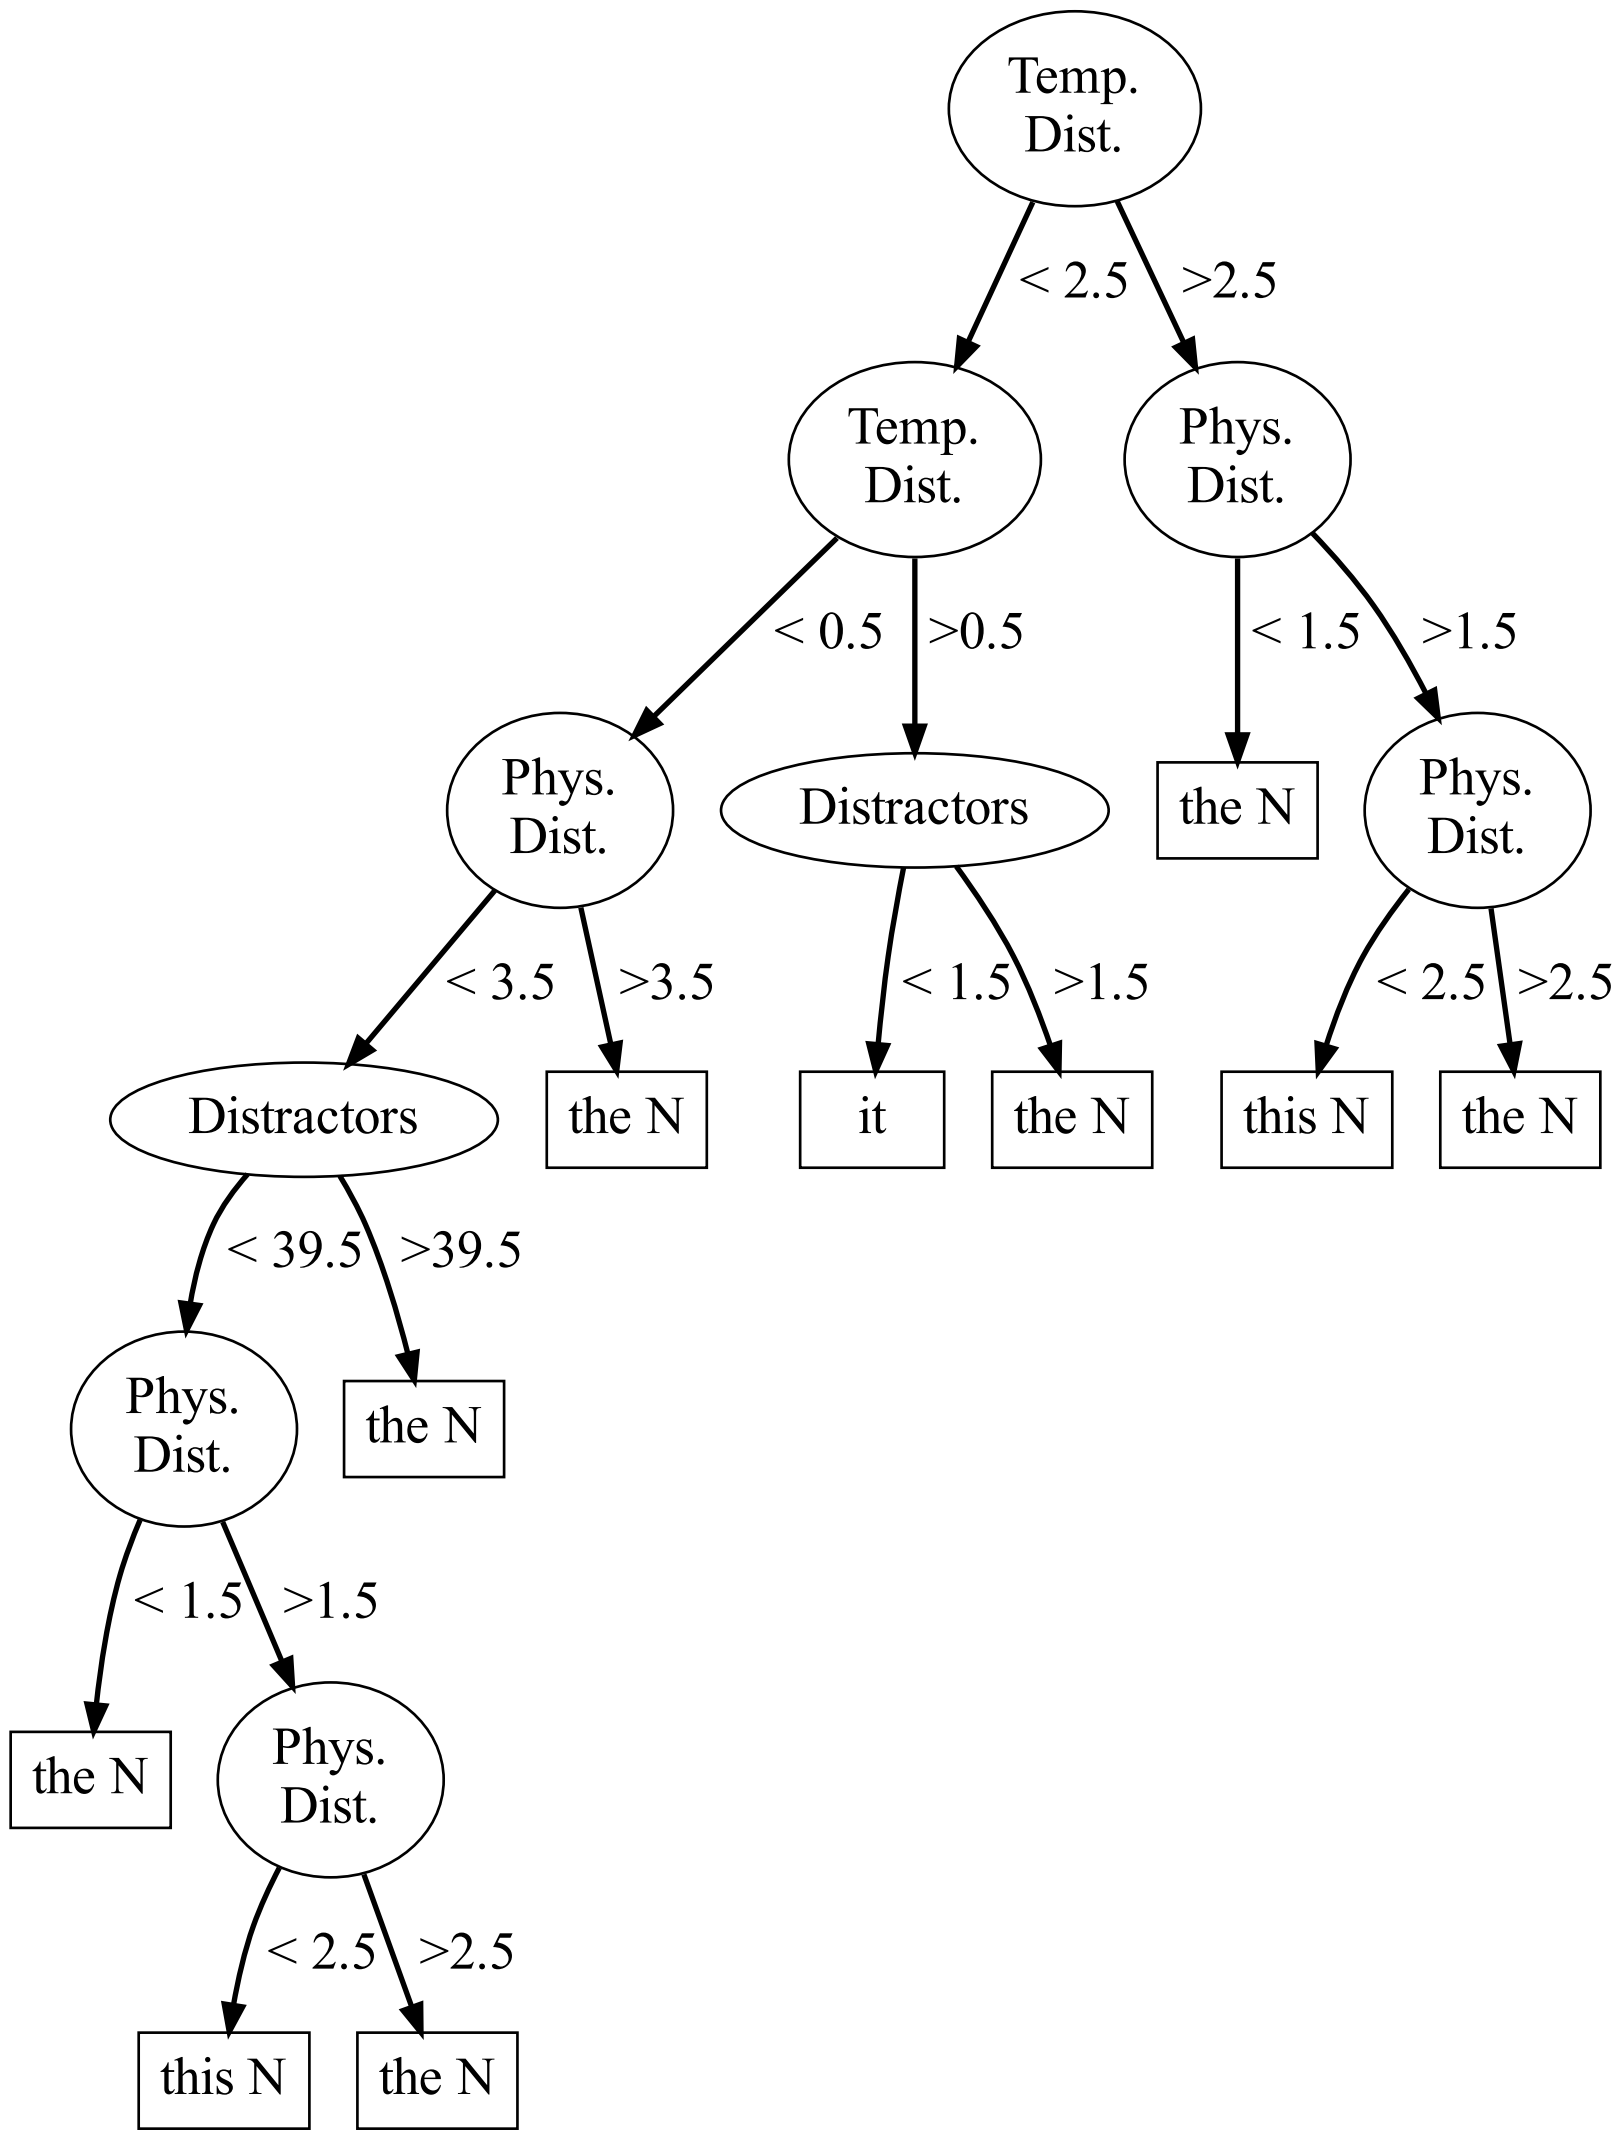

Supplement: software [file tree-M2.pdf › weka-dt/output/6-d6-prune/tree-M2.pdf]

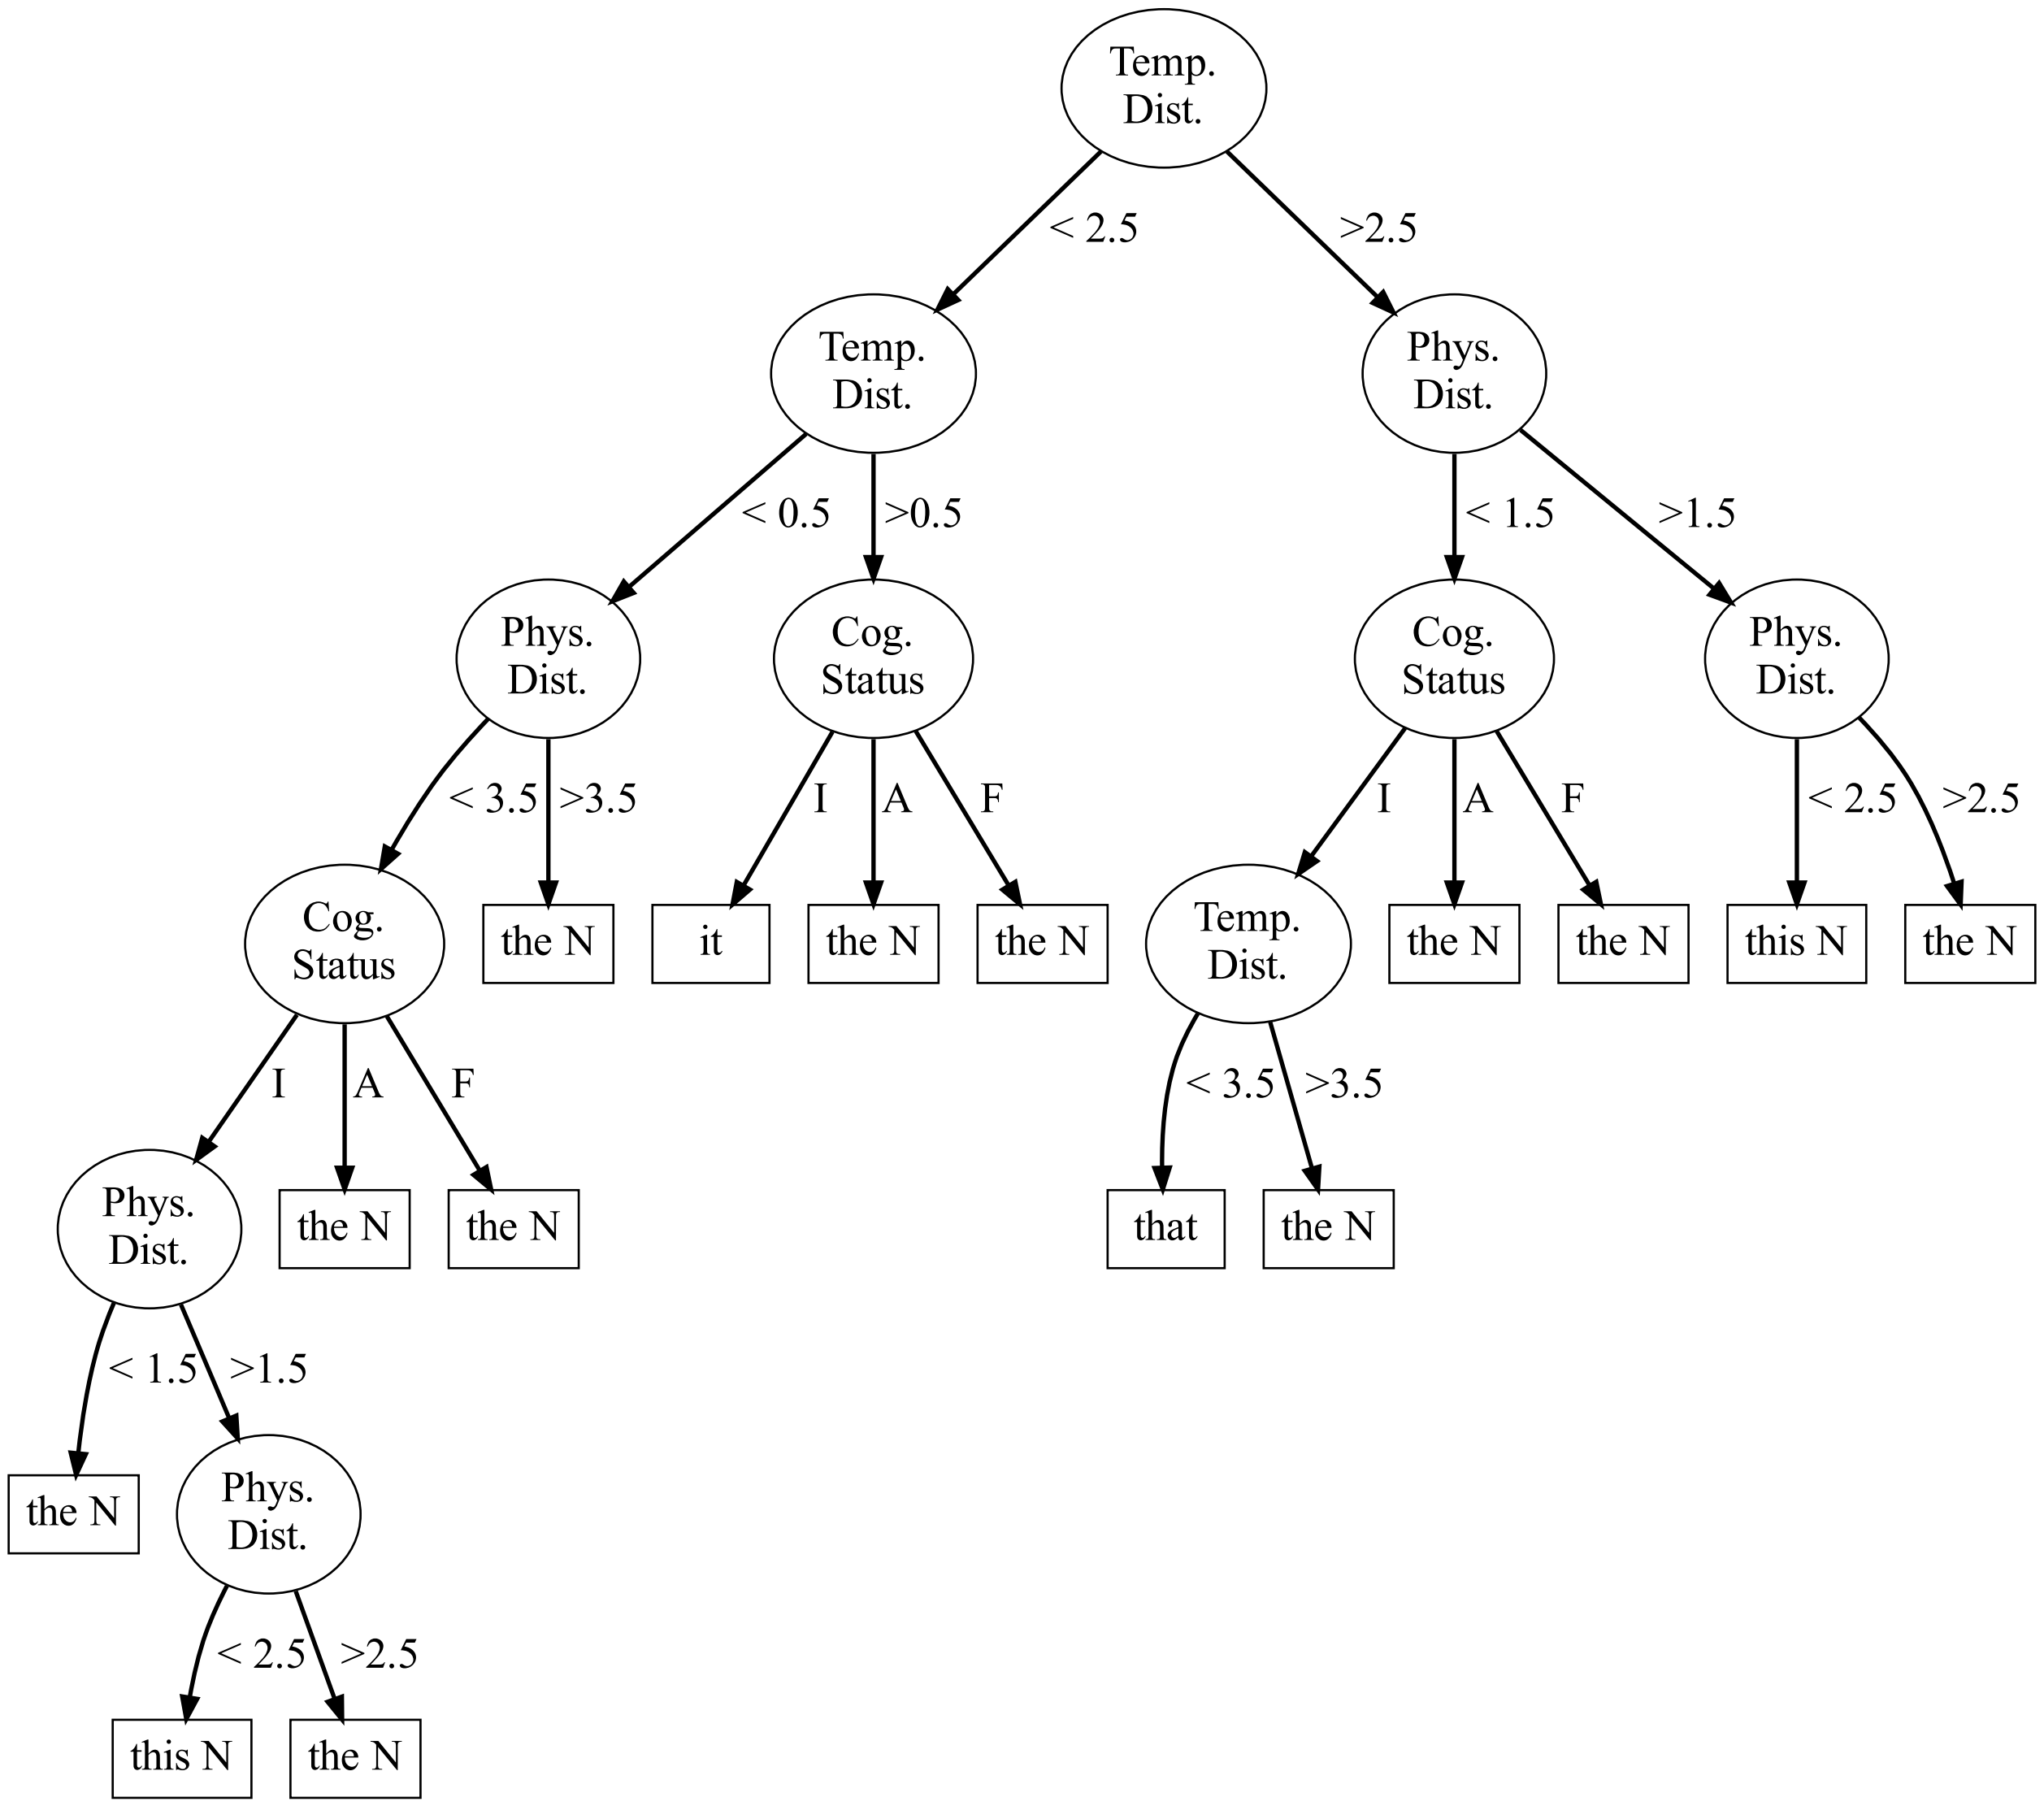

Supplement: software [file tree-M3.pdf › weka-dt/output/6-d6-prune/tree-M3.pdf]

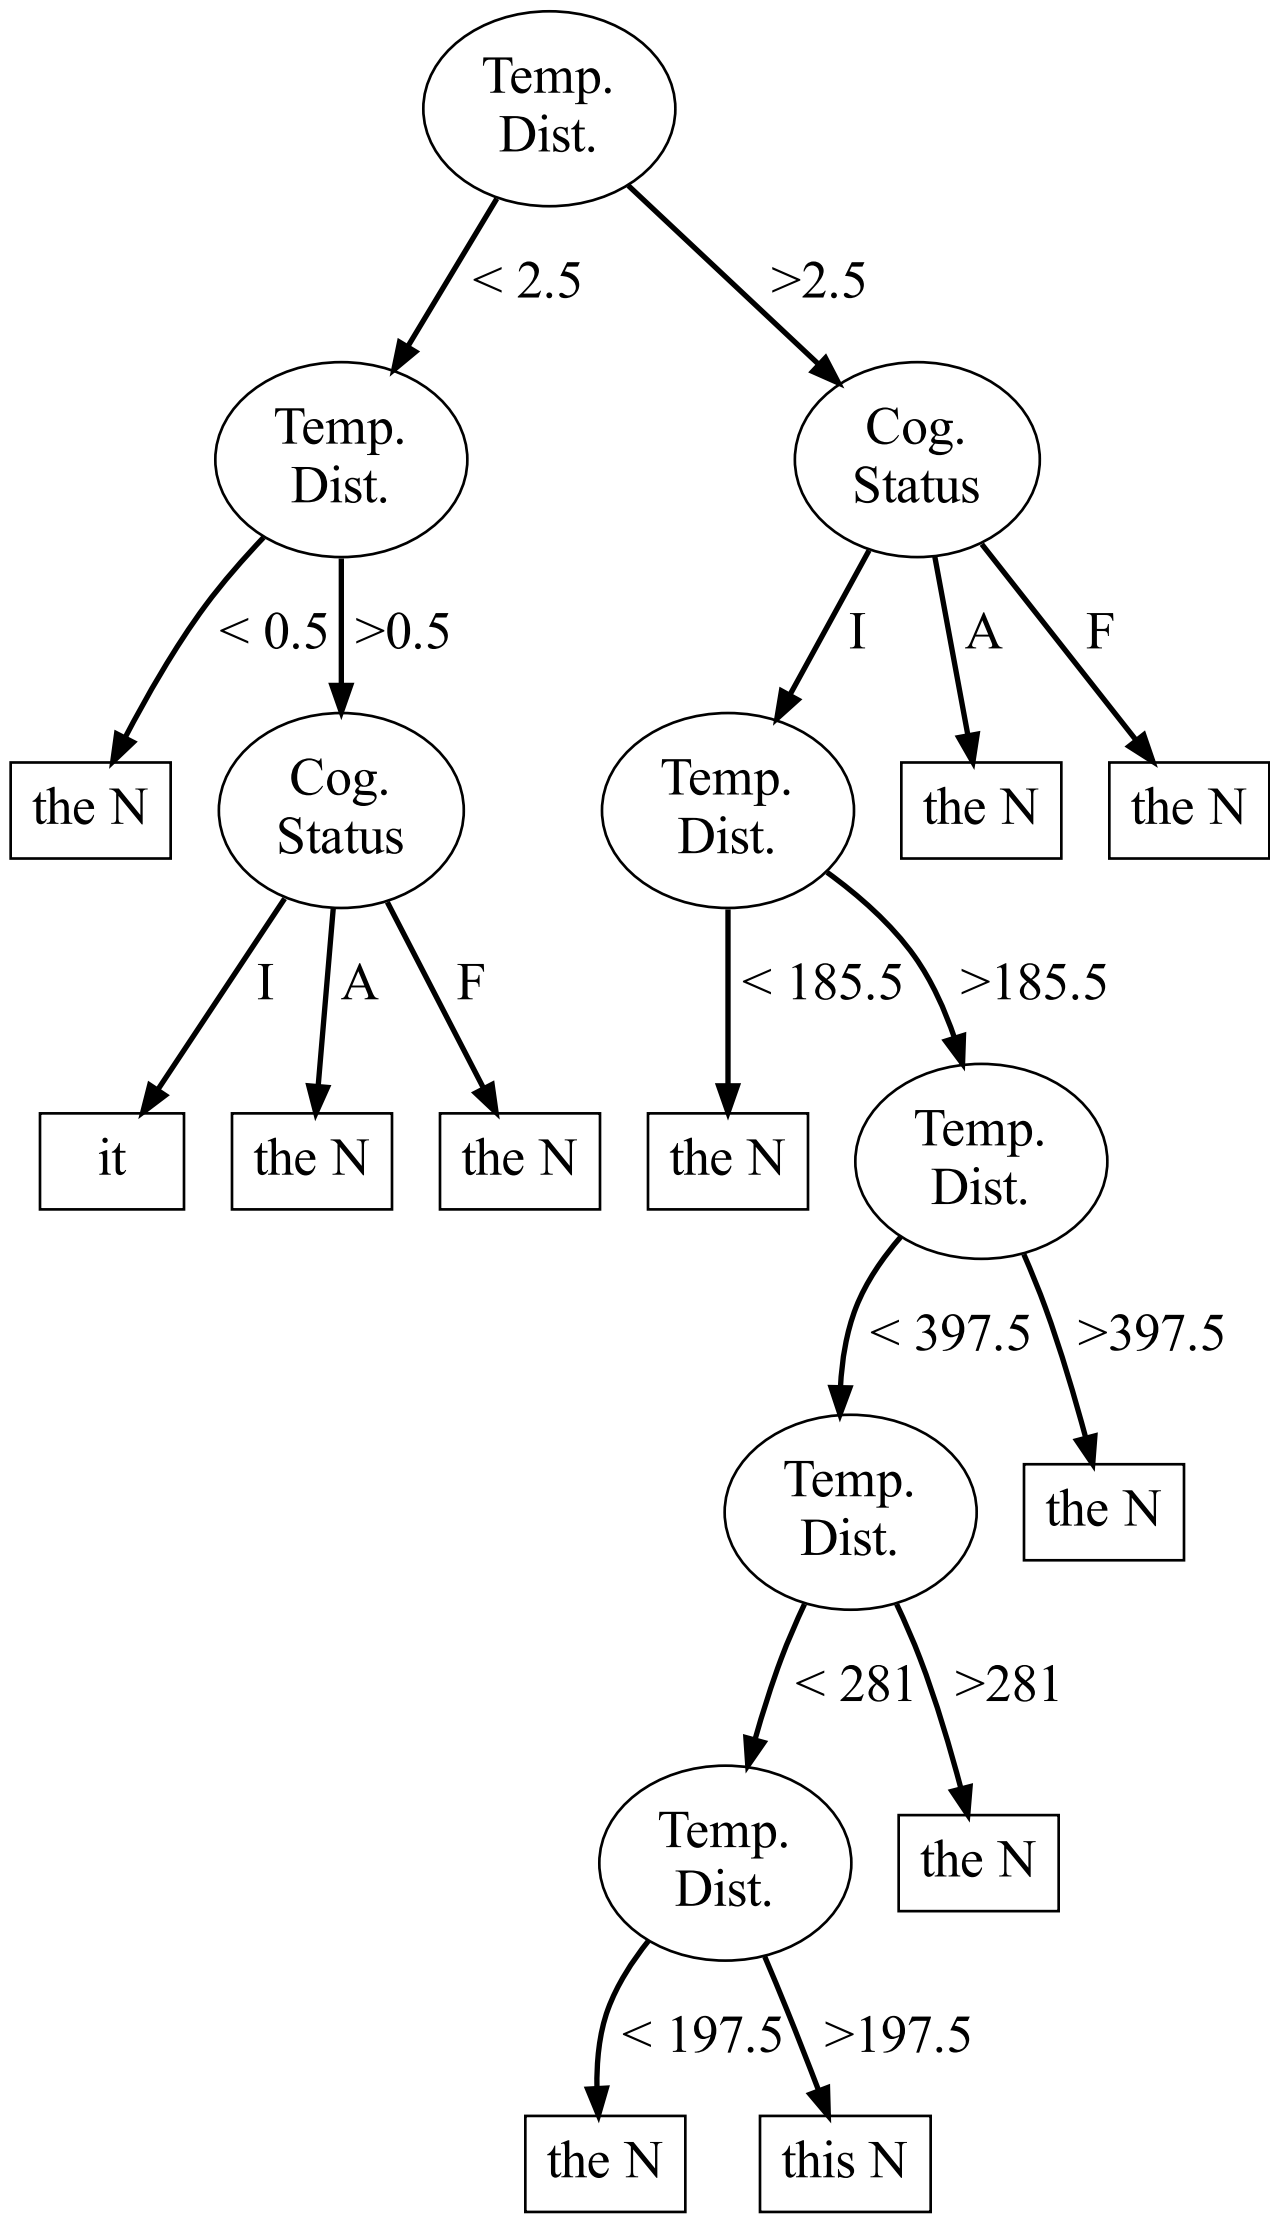

Supplement: software [file tree-M4.pdf › weka-dt/output/6-d6-prune/tree-M4.pdf]



Supplement: software [file tree-M5.pdf › weka-dt/output/6-d6-prune/tree-M5.pdf]

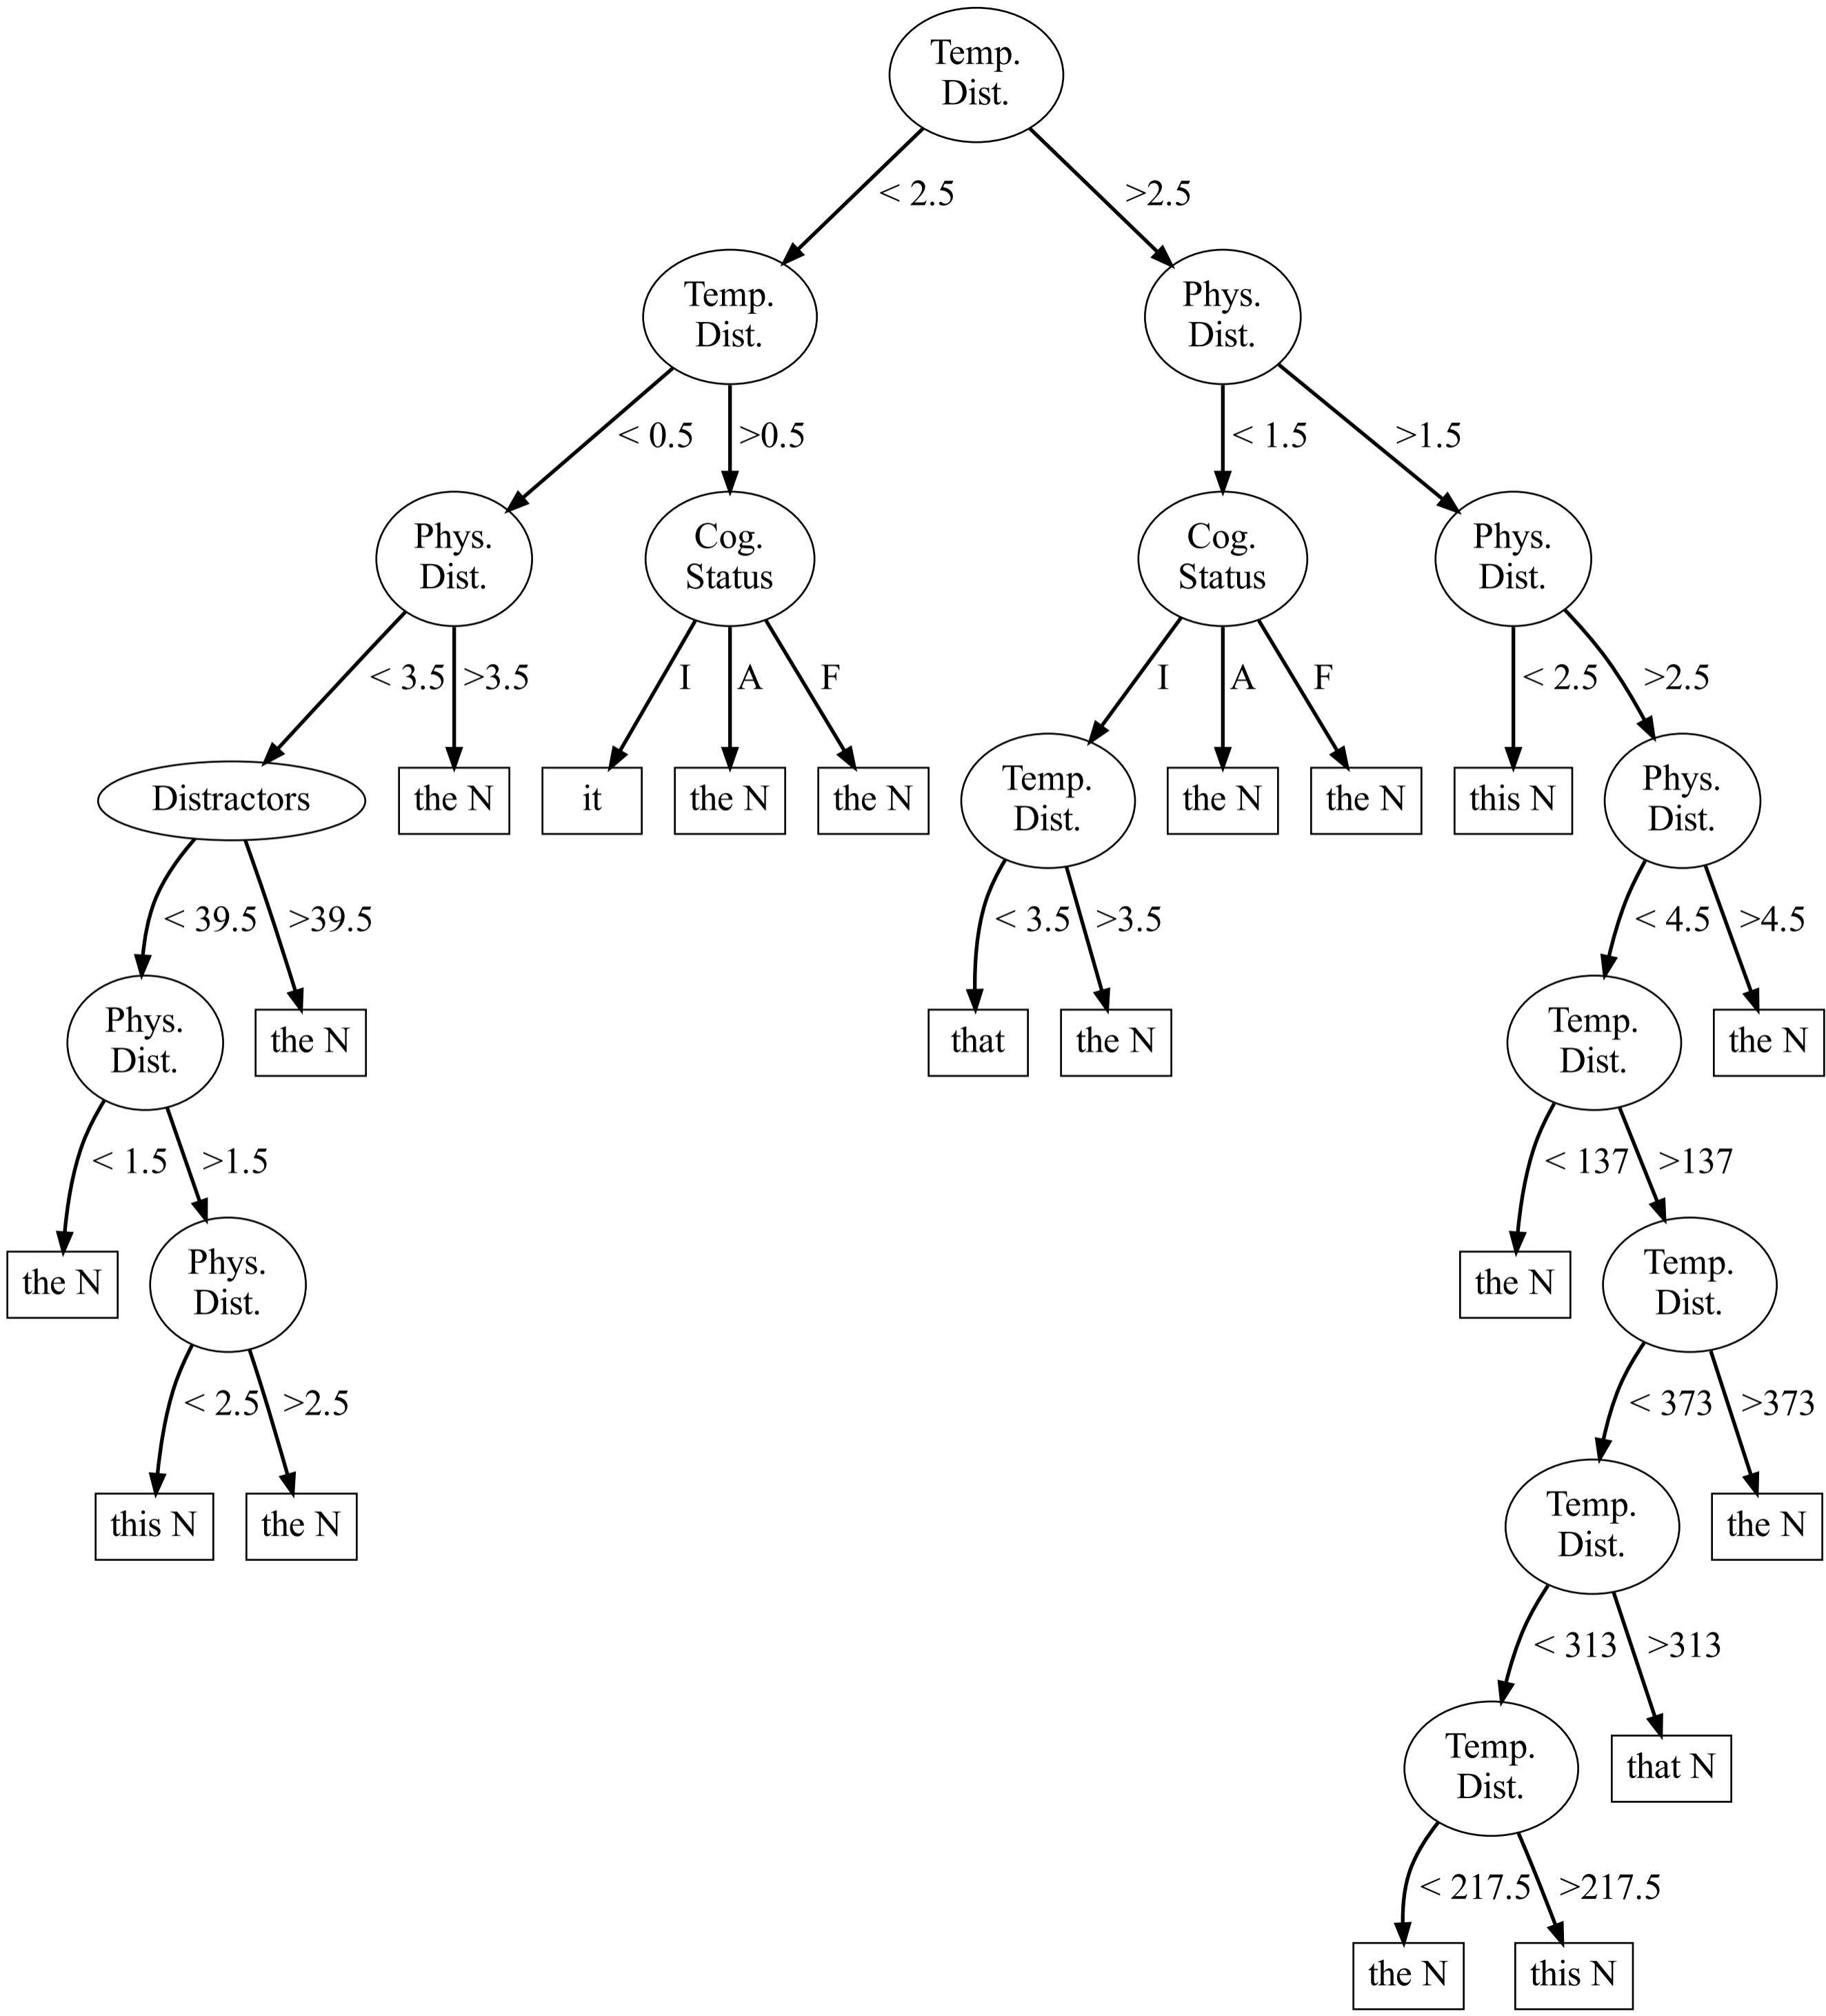

Supplement: software [file tree-M1.pdf › weka-dt/output/6/tree-M1.pdf]

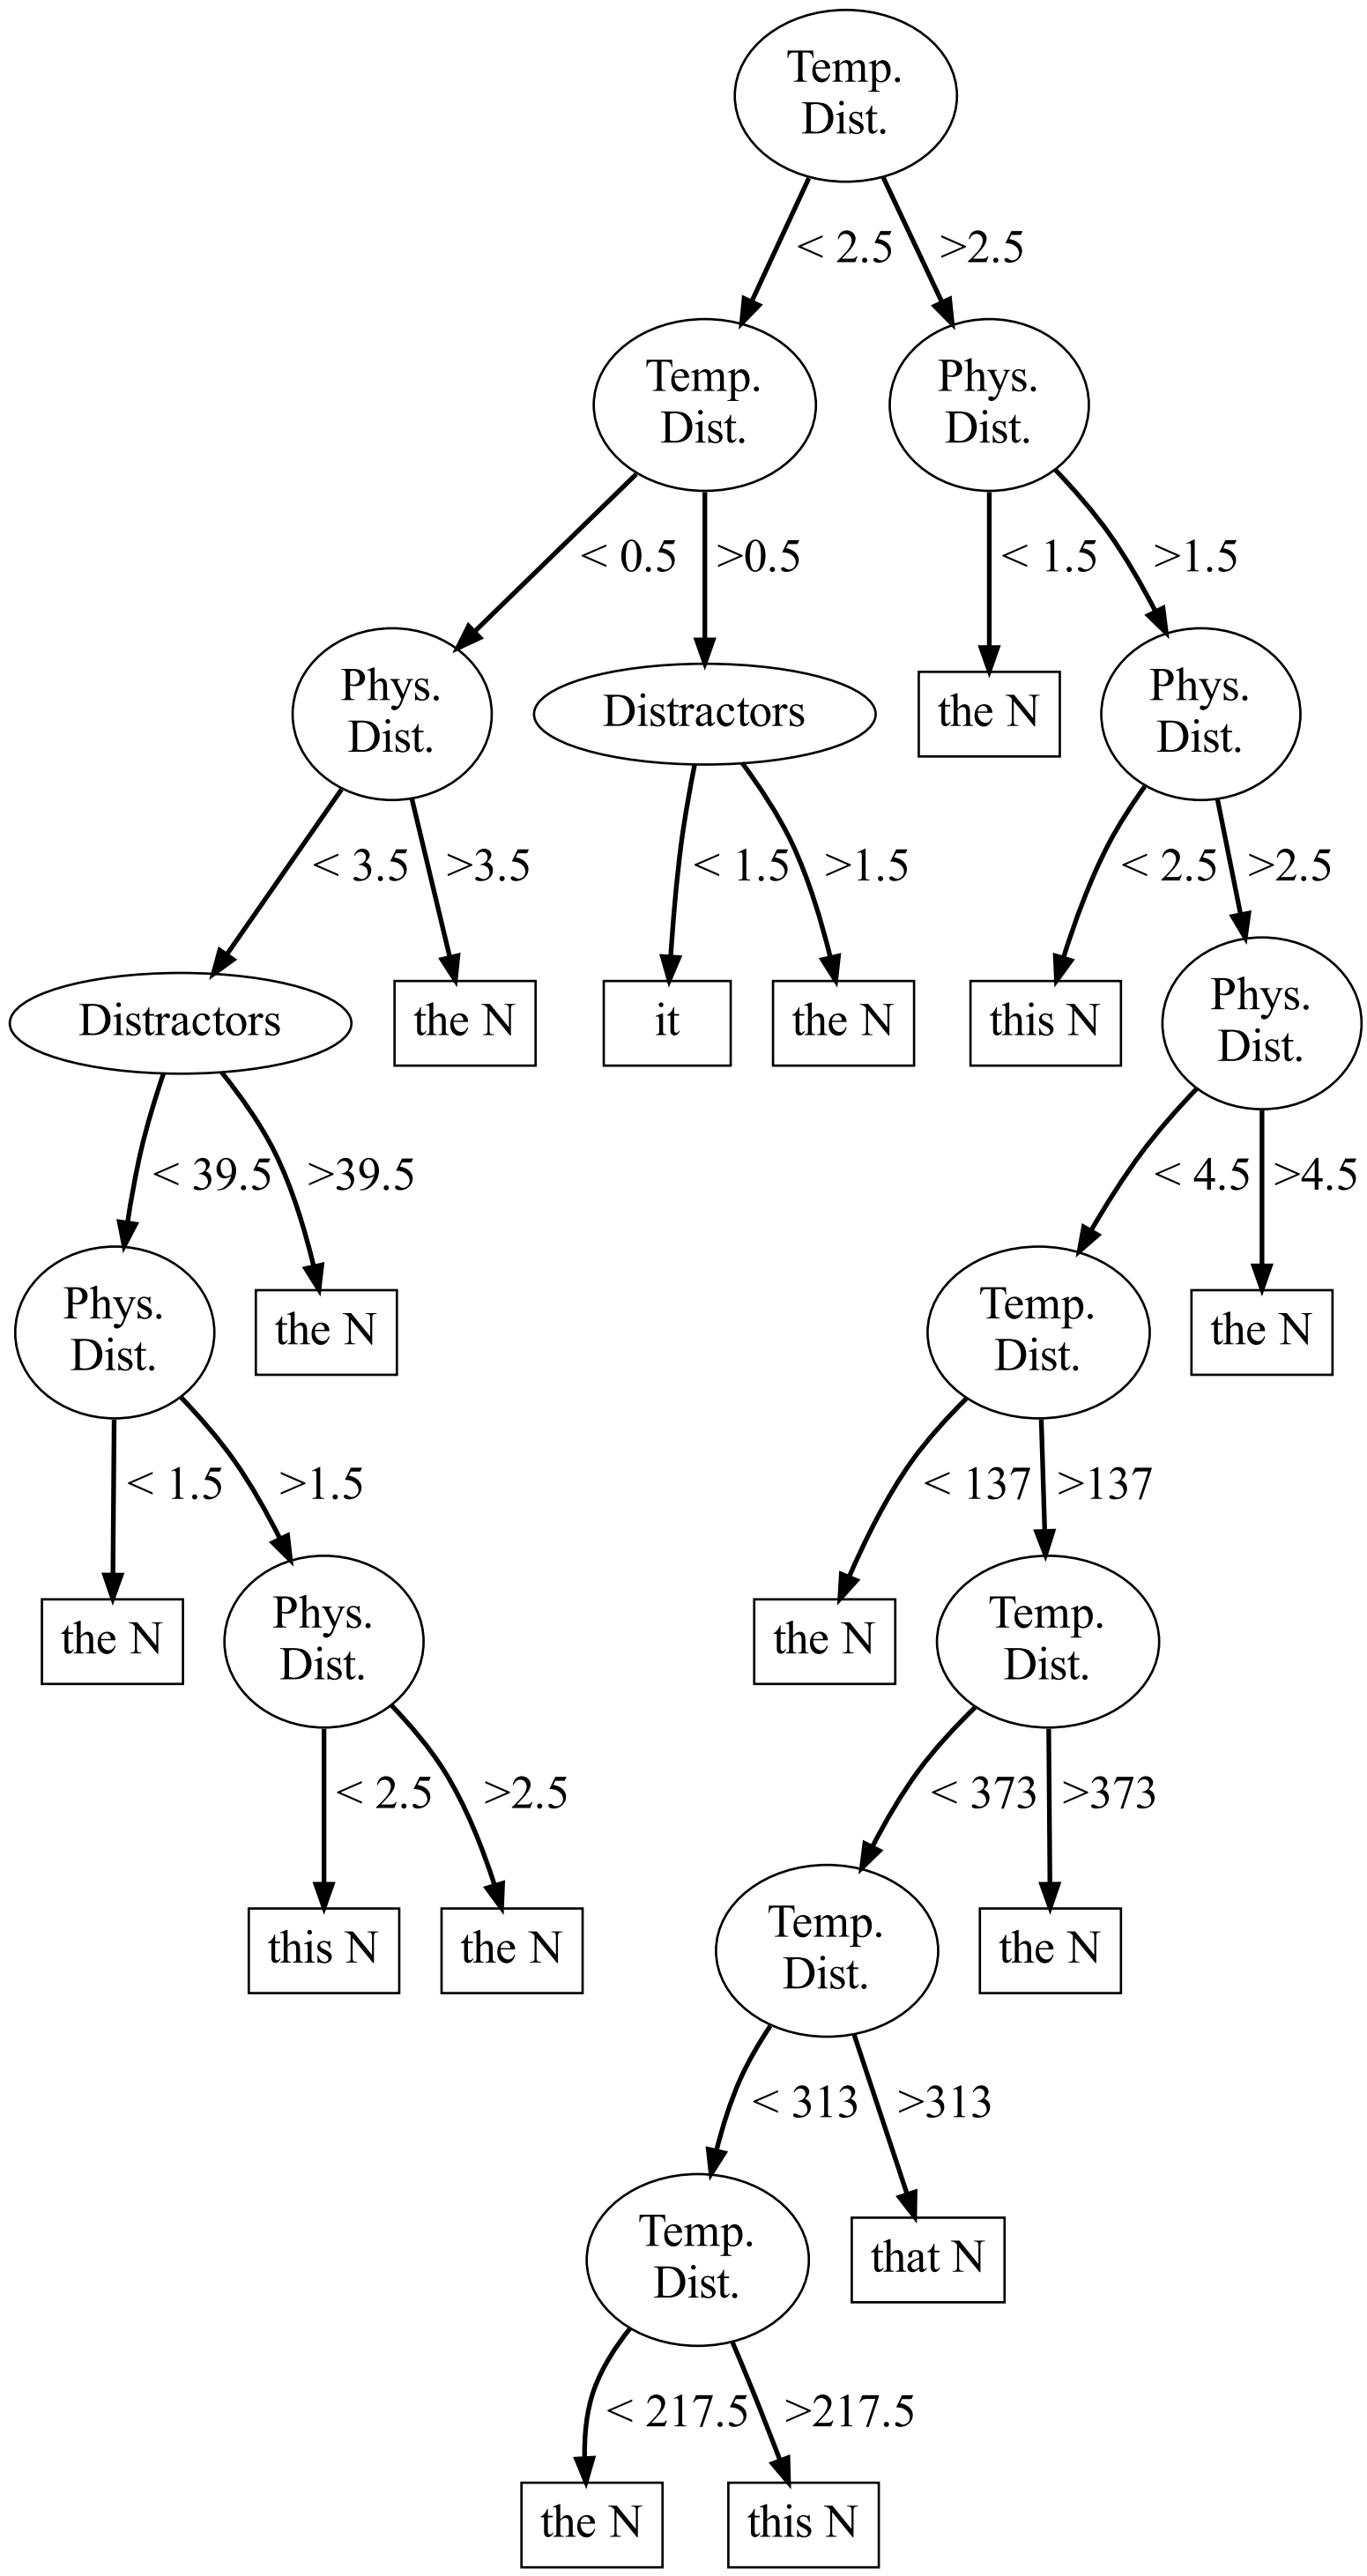

Supplement: software [file tree-M2.pdf › weka-dt/output/6/tree-M2.pdf]

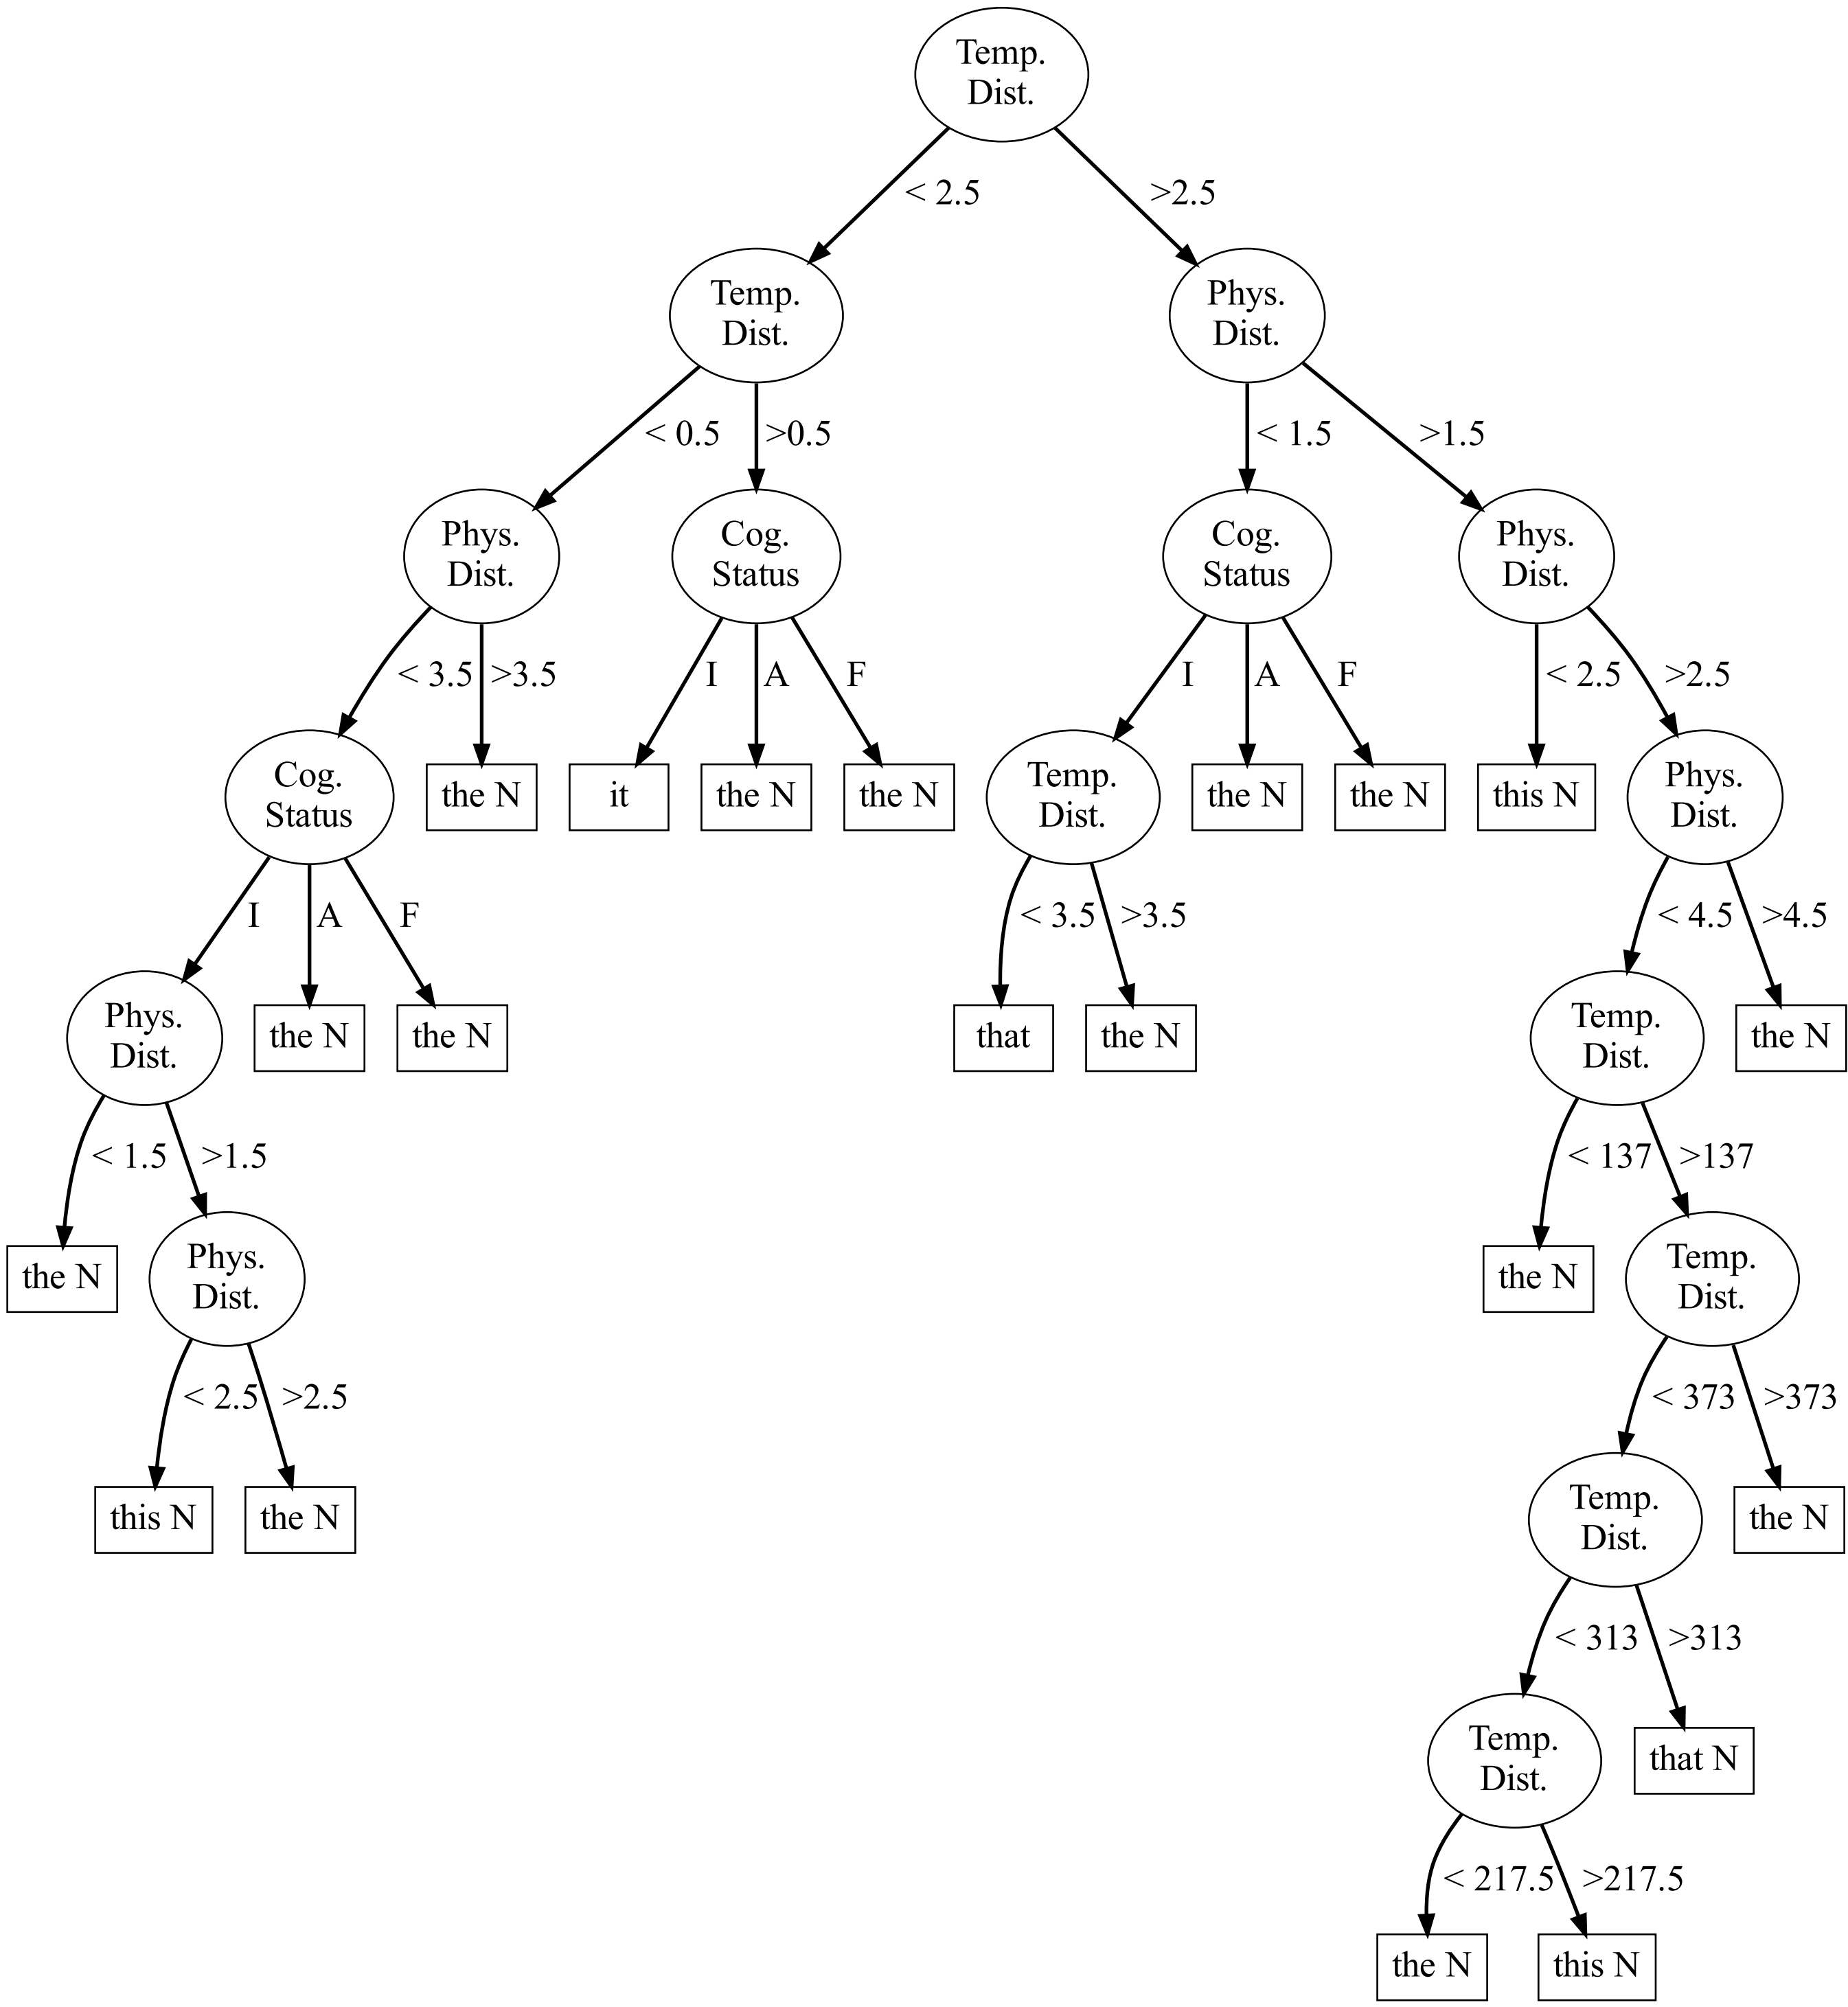

Supplement: software [file tree-M3.pdf › weka-dt/output/6/tree-M3.pdf]



Supplement: software [file tree-M4.pdf › weka-dt/output/6/tree-M4.pdf]



Supplement: software [file tree-M5.pdf › weka-dt/output/6/tree-M5.pdf]

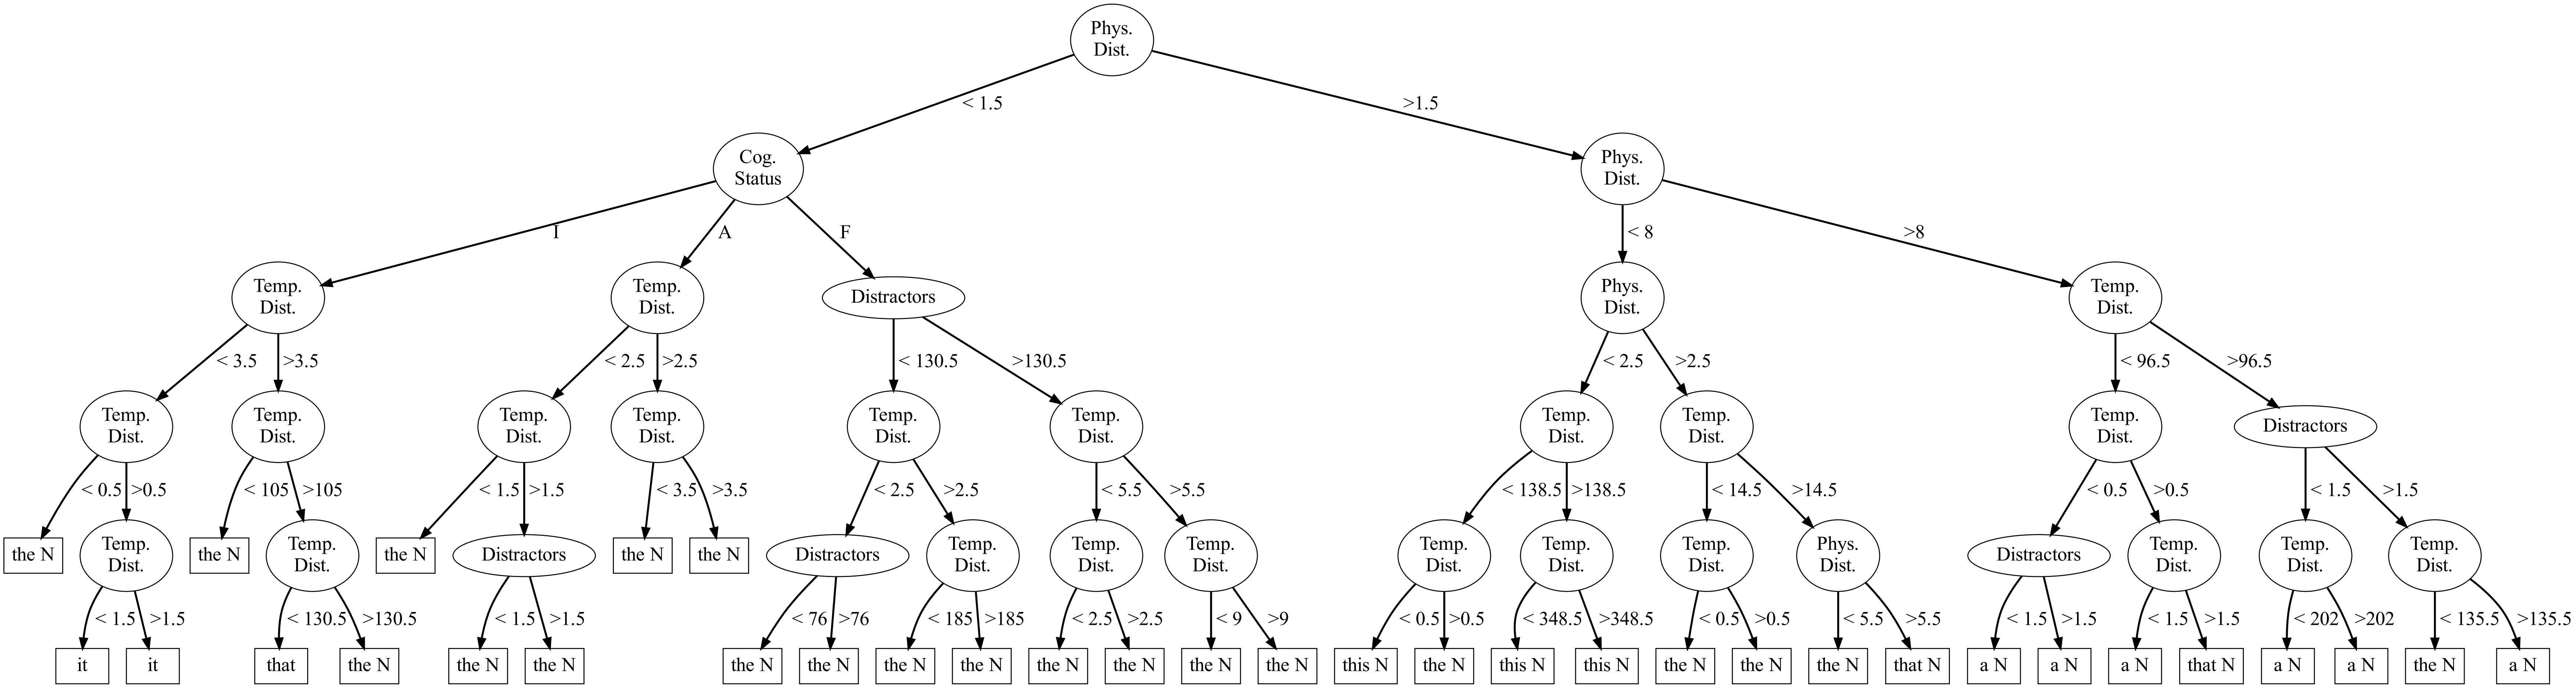

Supplement: software [file tree-M1.pdf › weka-dt/output/8-d5-noprune/tree-M1.pdf]

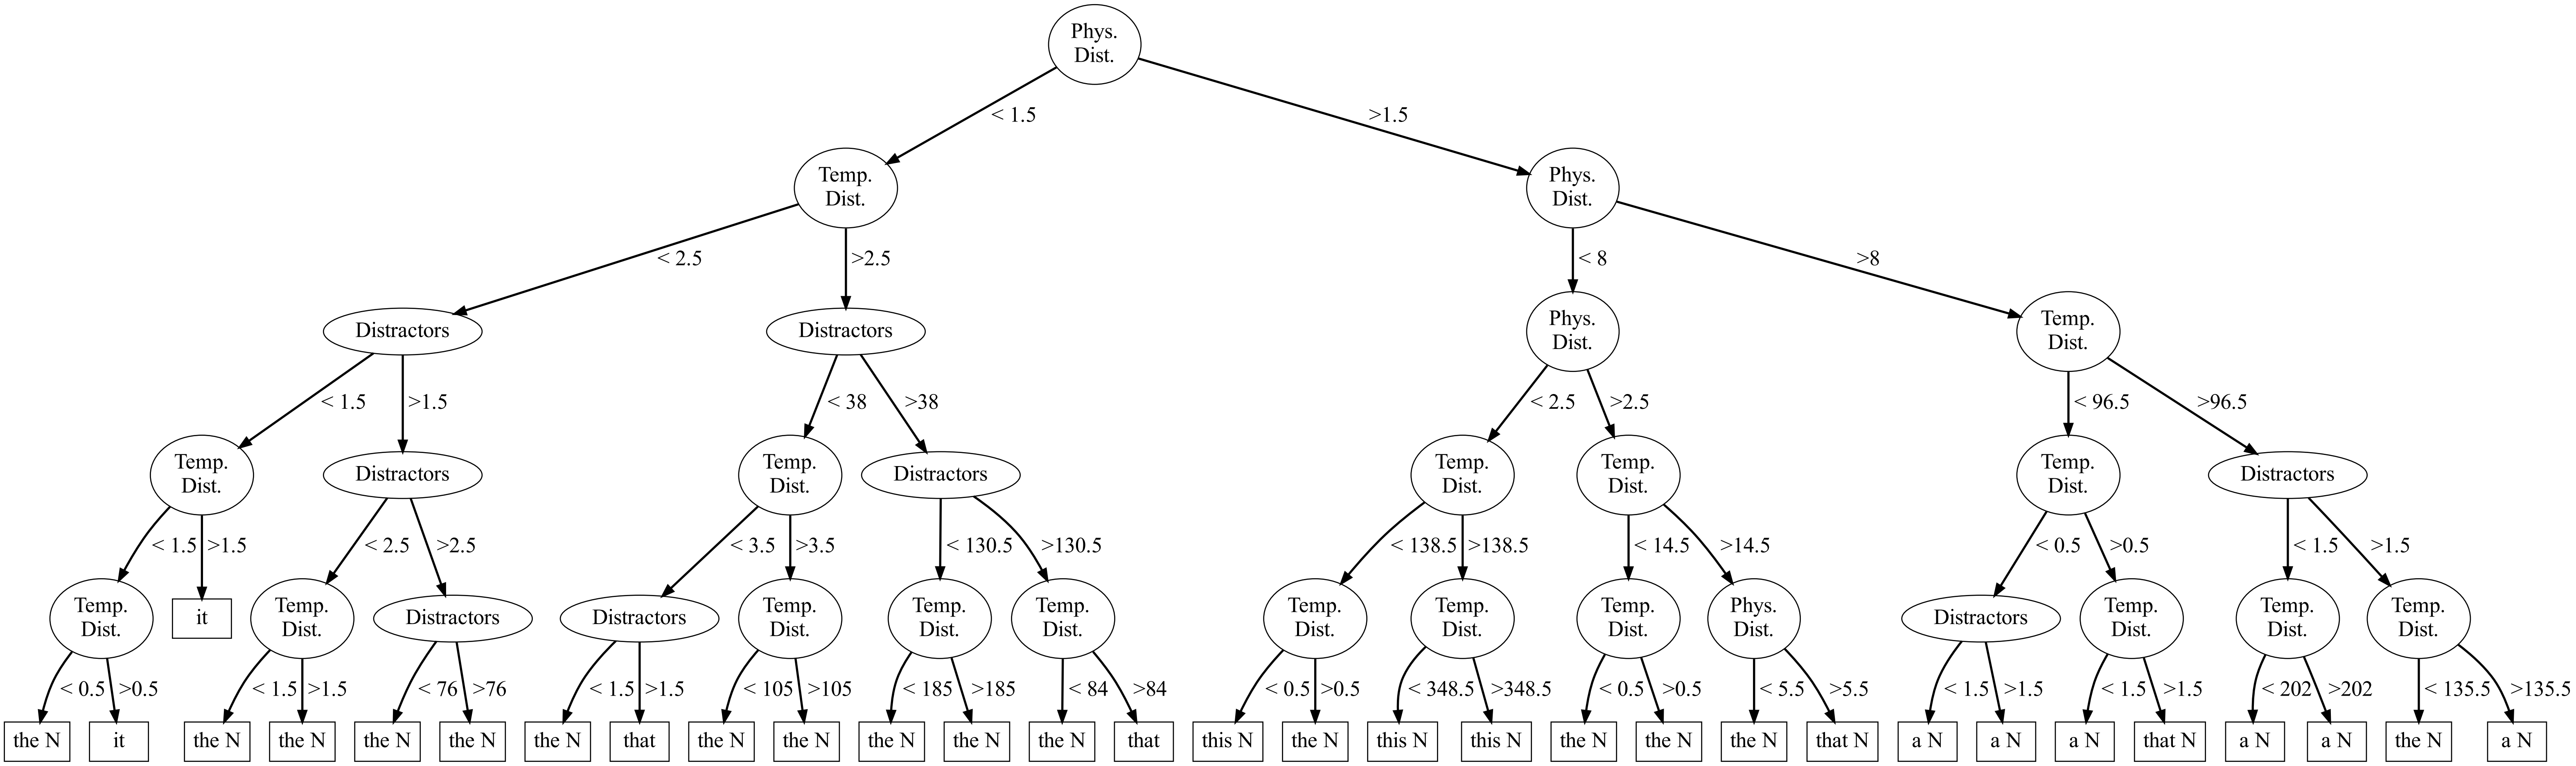

Supplement: software [file tree-M2.pdf › weka-dt/output/8-d5-noprune/tree-M2.pdf]

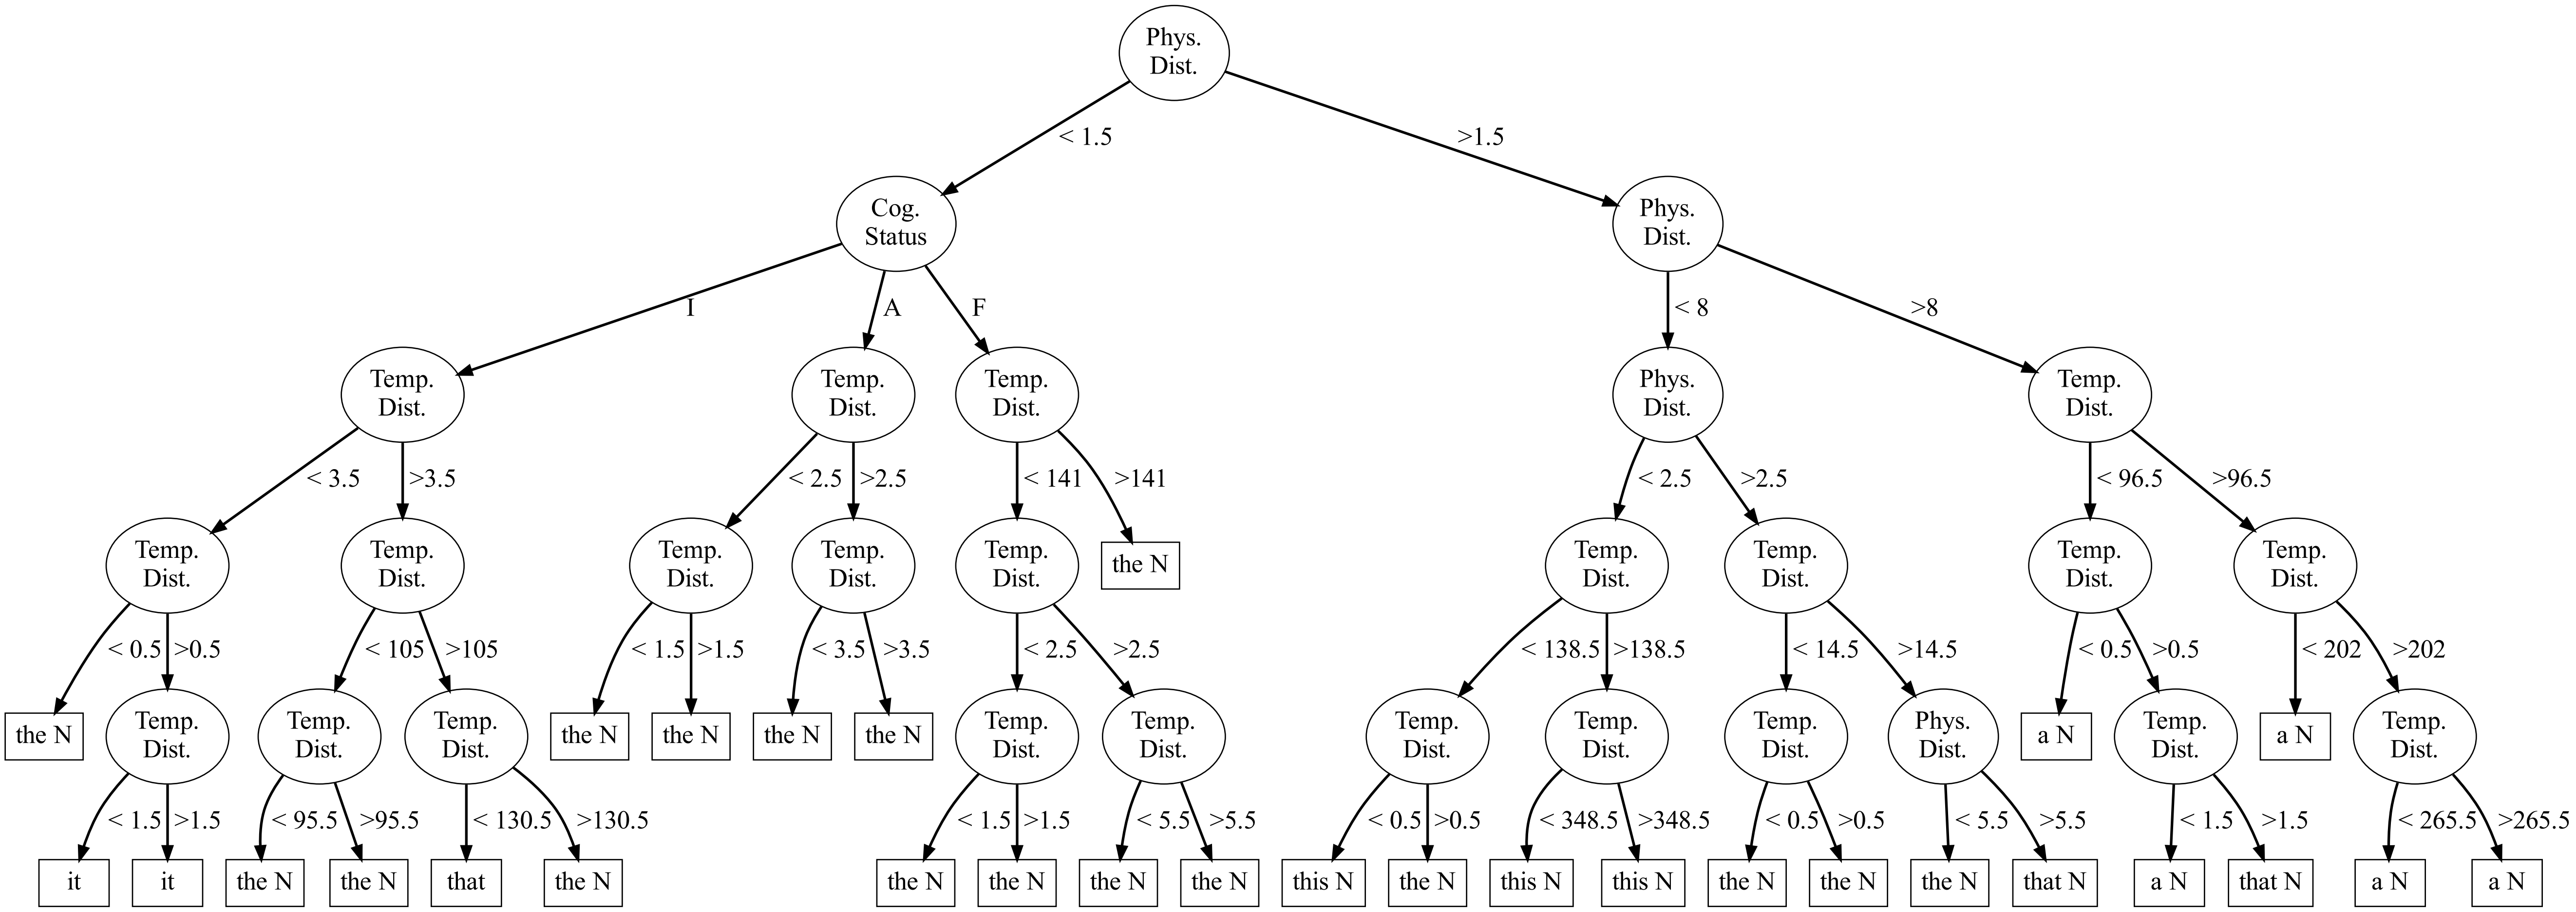

Supplement: software [file tree-M3.pdf › weka-dt/output/8-d5-noprune/tree-M3.pdf]

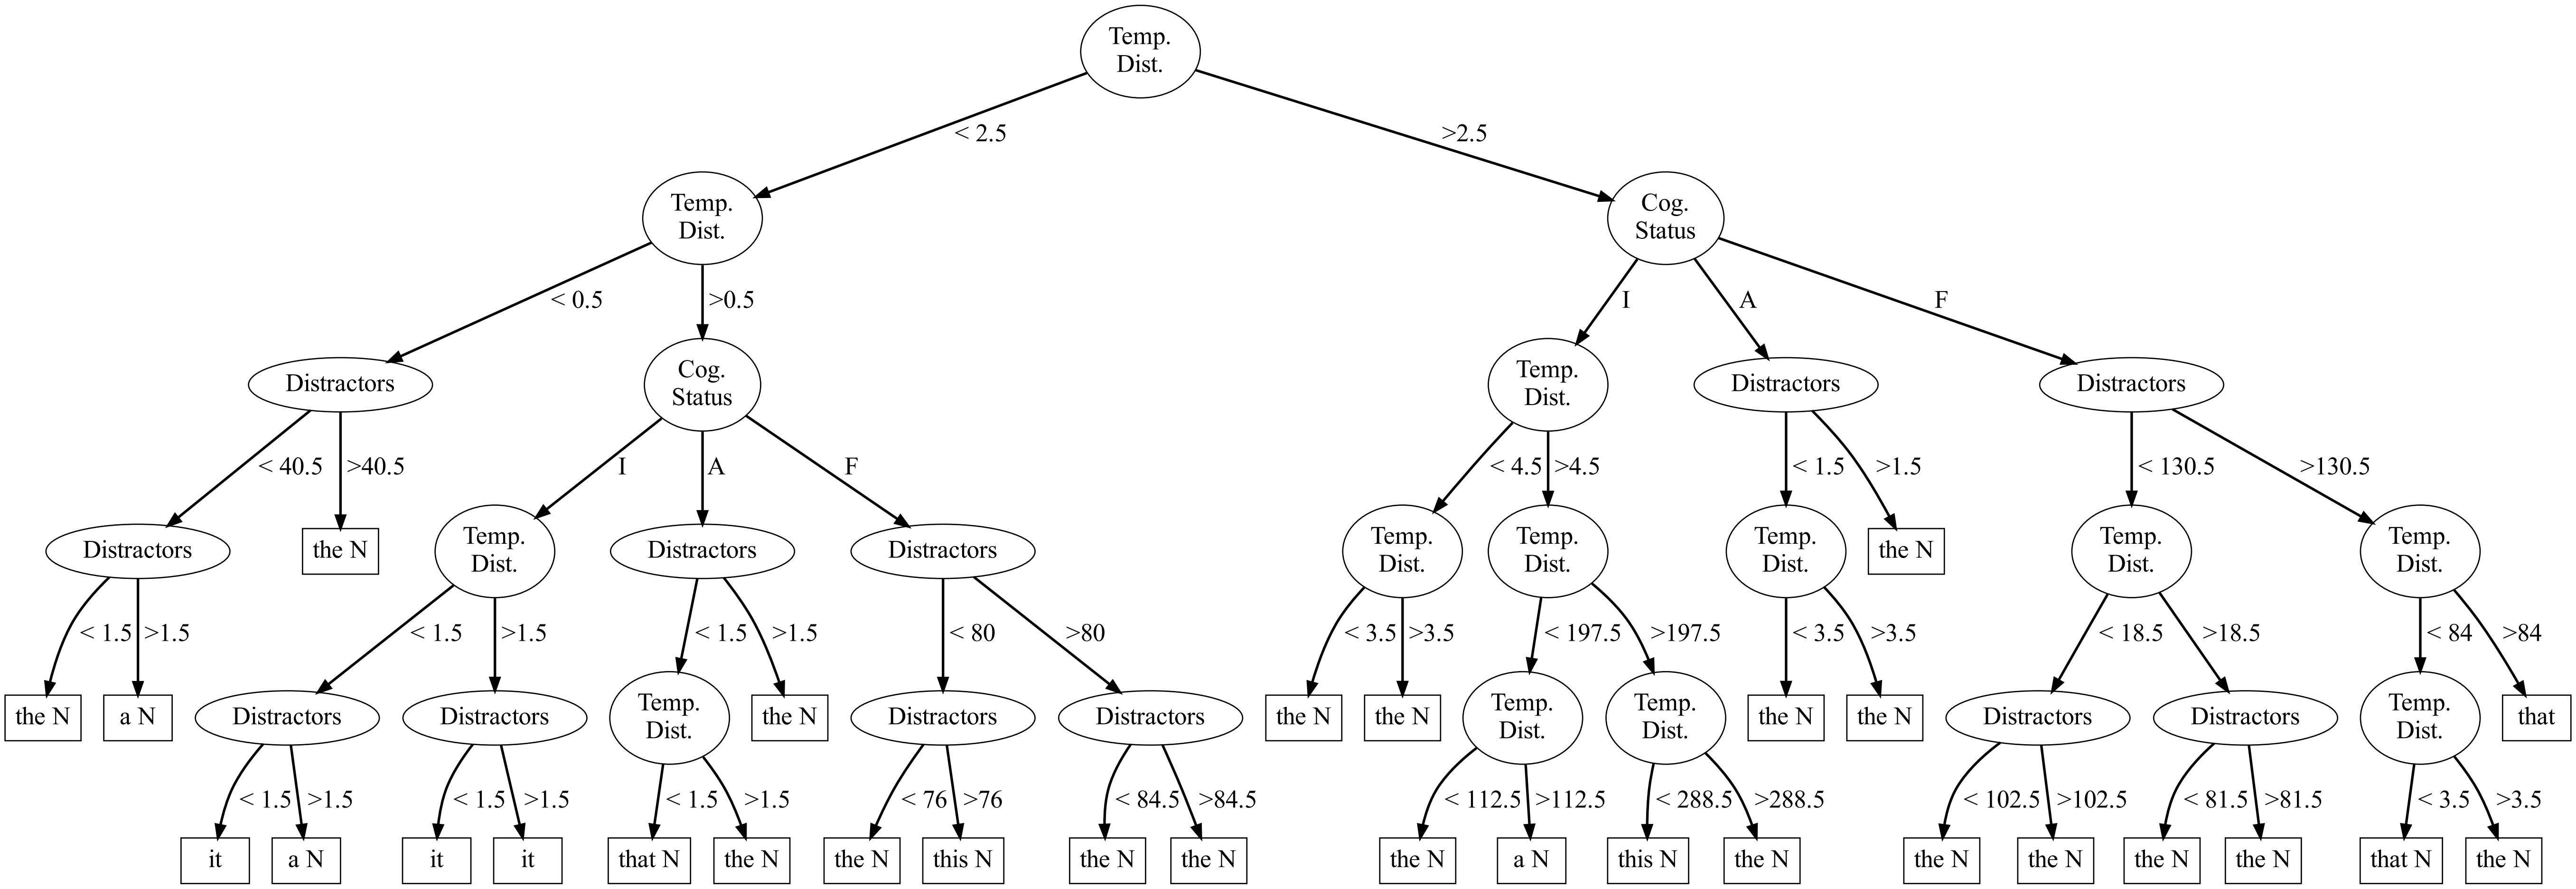

Supplement: software [file tree-M4.pdf › weka-dt/output/8-d5-noprune/tree-M4.pdf]

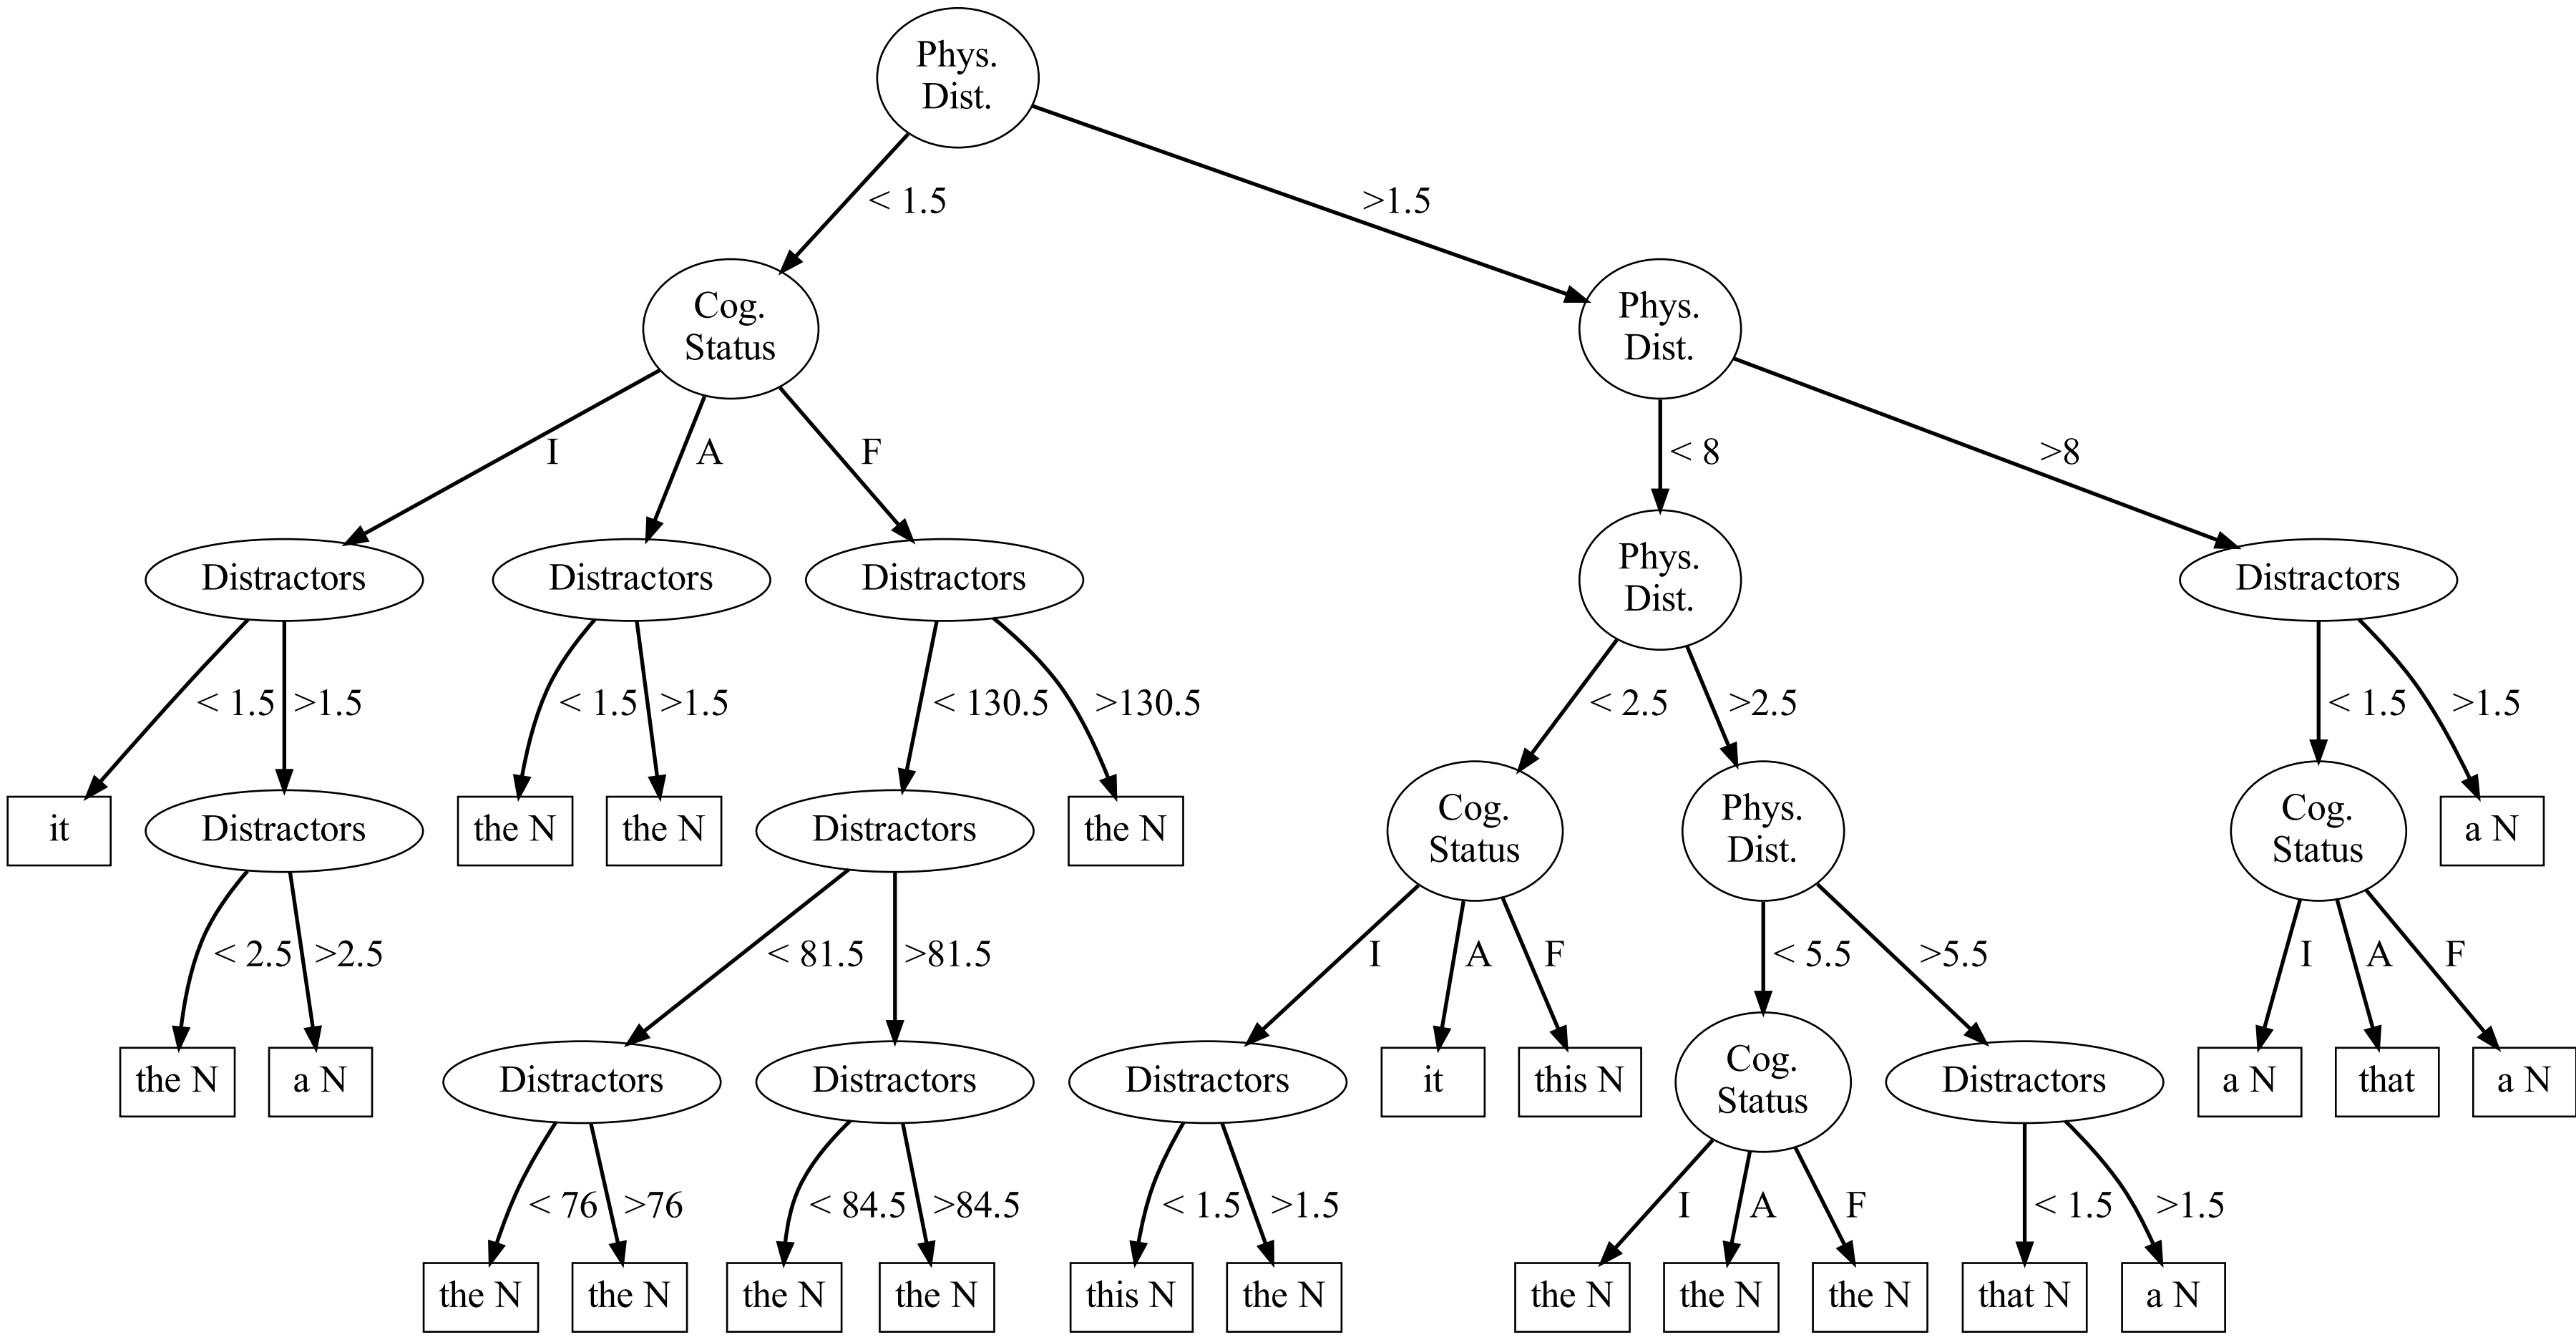

Supplement: software [file tree-M5.pdf › weka-dt/output/8-d5-noprune/tree-M5.pdf]

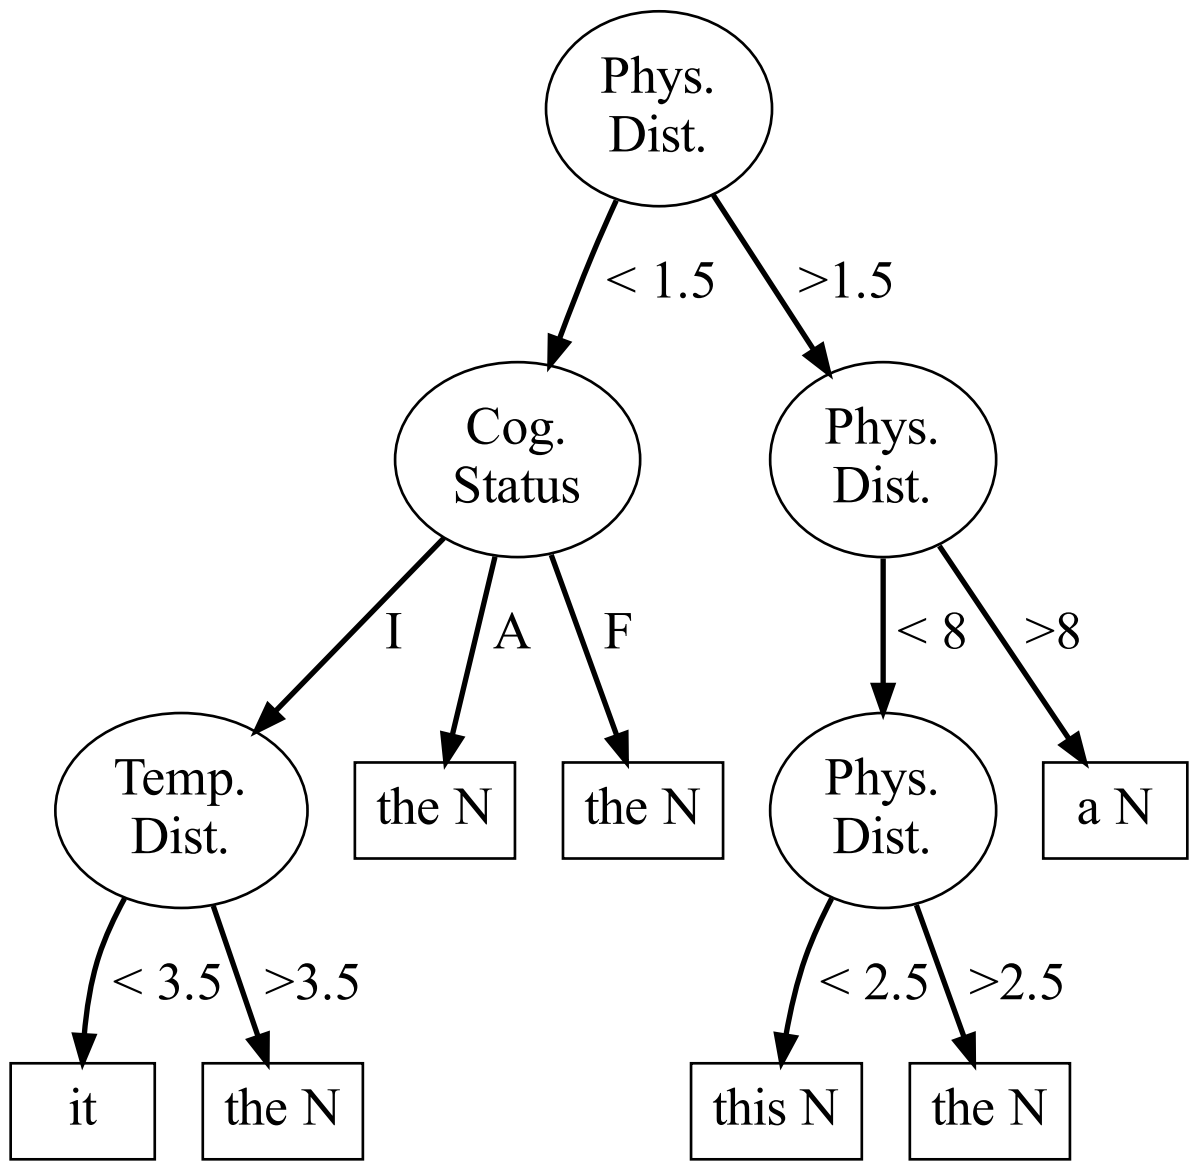

Supplement: software [file tree-M1.pdf › weka-dt/output/8-d5-prune/tree-M1.pdf]

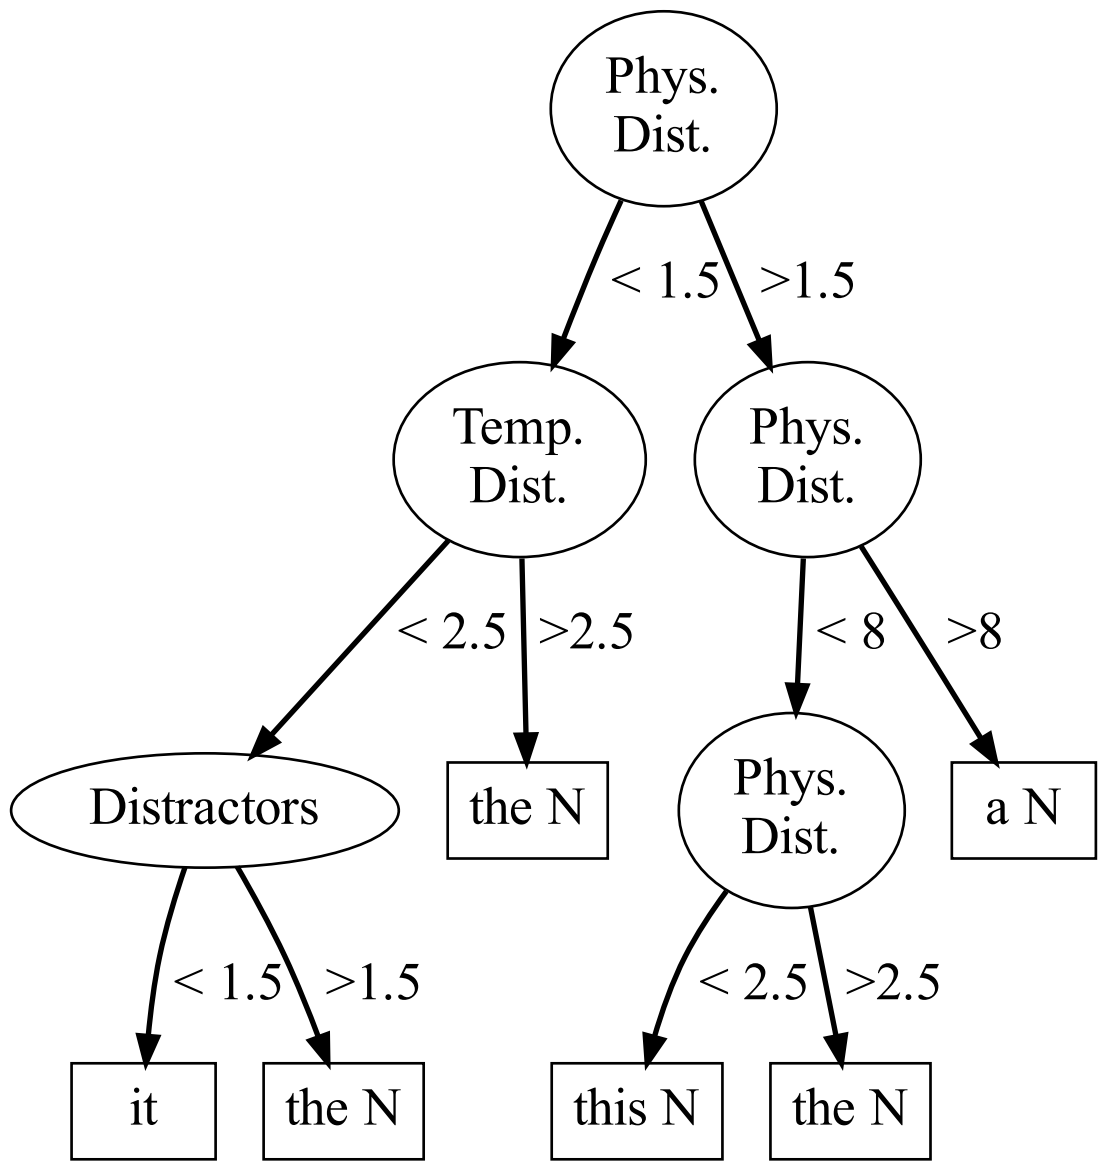

Supplement: software [file tree-M2.pdf › weka-dt/output/8-d5-prune/tree-M2.pdf]



Supplement: software [file tree-M3.pdf › weka-dt/output/8-d5-prune/tree-M3.pdf]

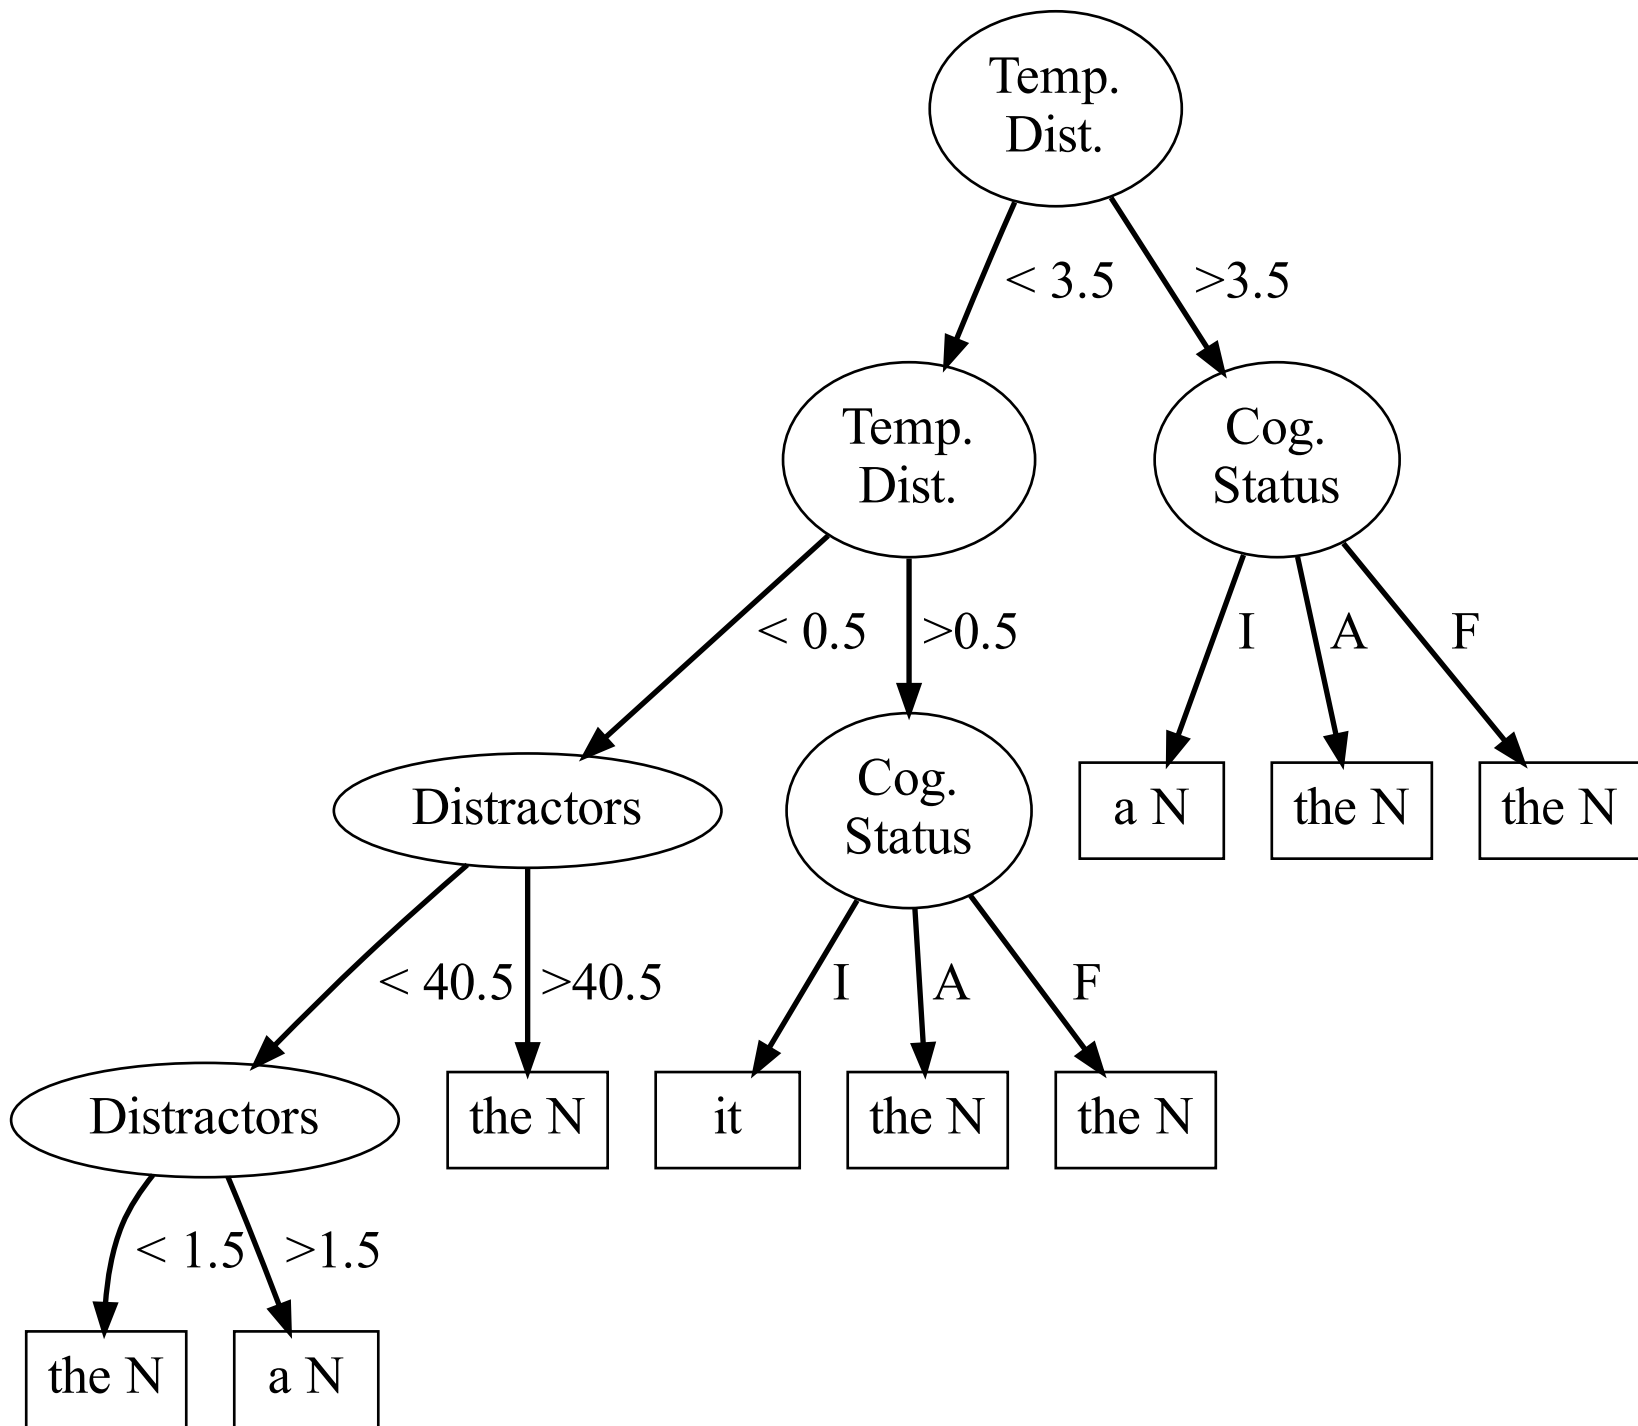

Supplement: software [file tree-M4.pdf › weka-dt/output/8-d5-prune/tree-M4.pdf]

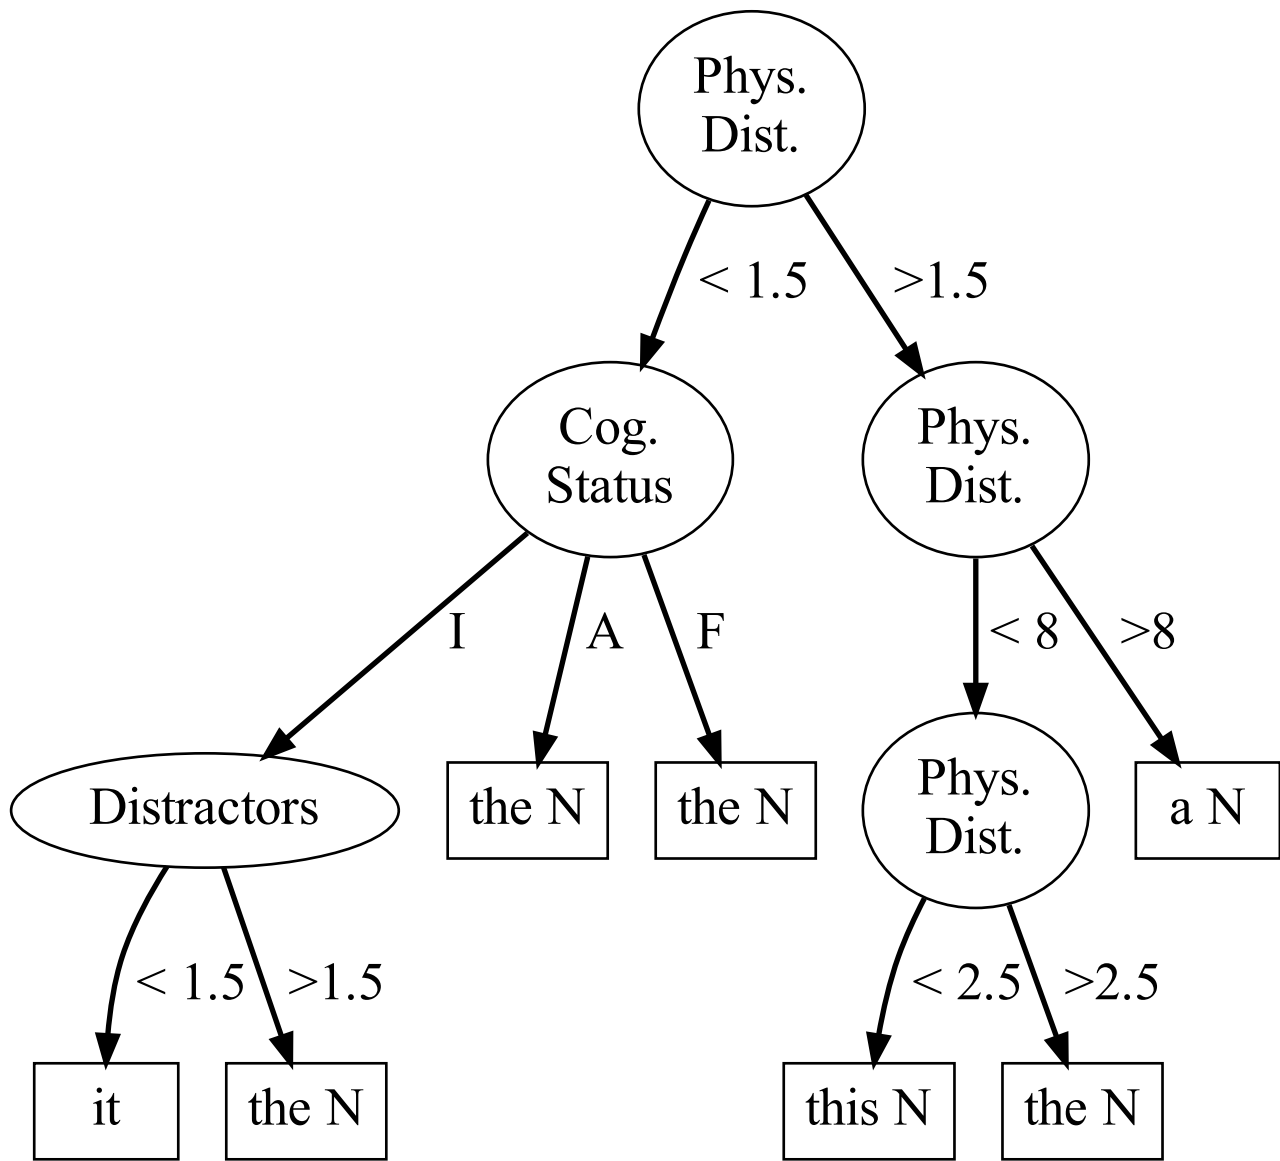

Supplement: software [file tree-M5.pdf › weka-dt/output/8-d5-prune/tree-M5.pdf]

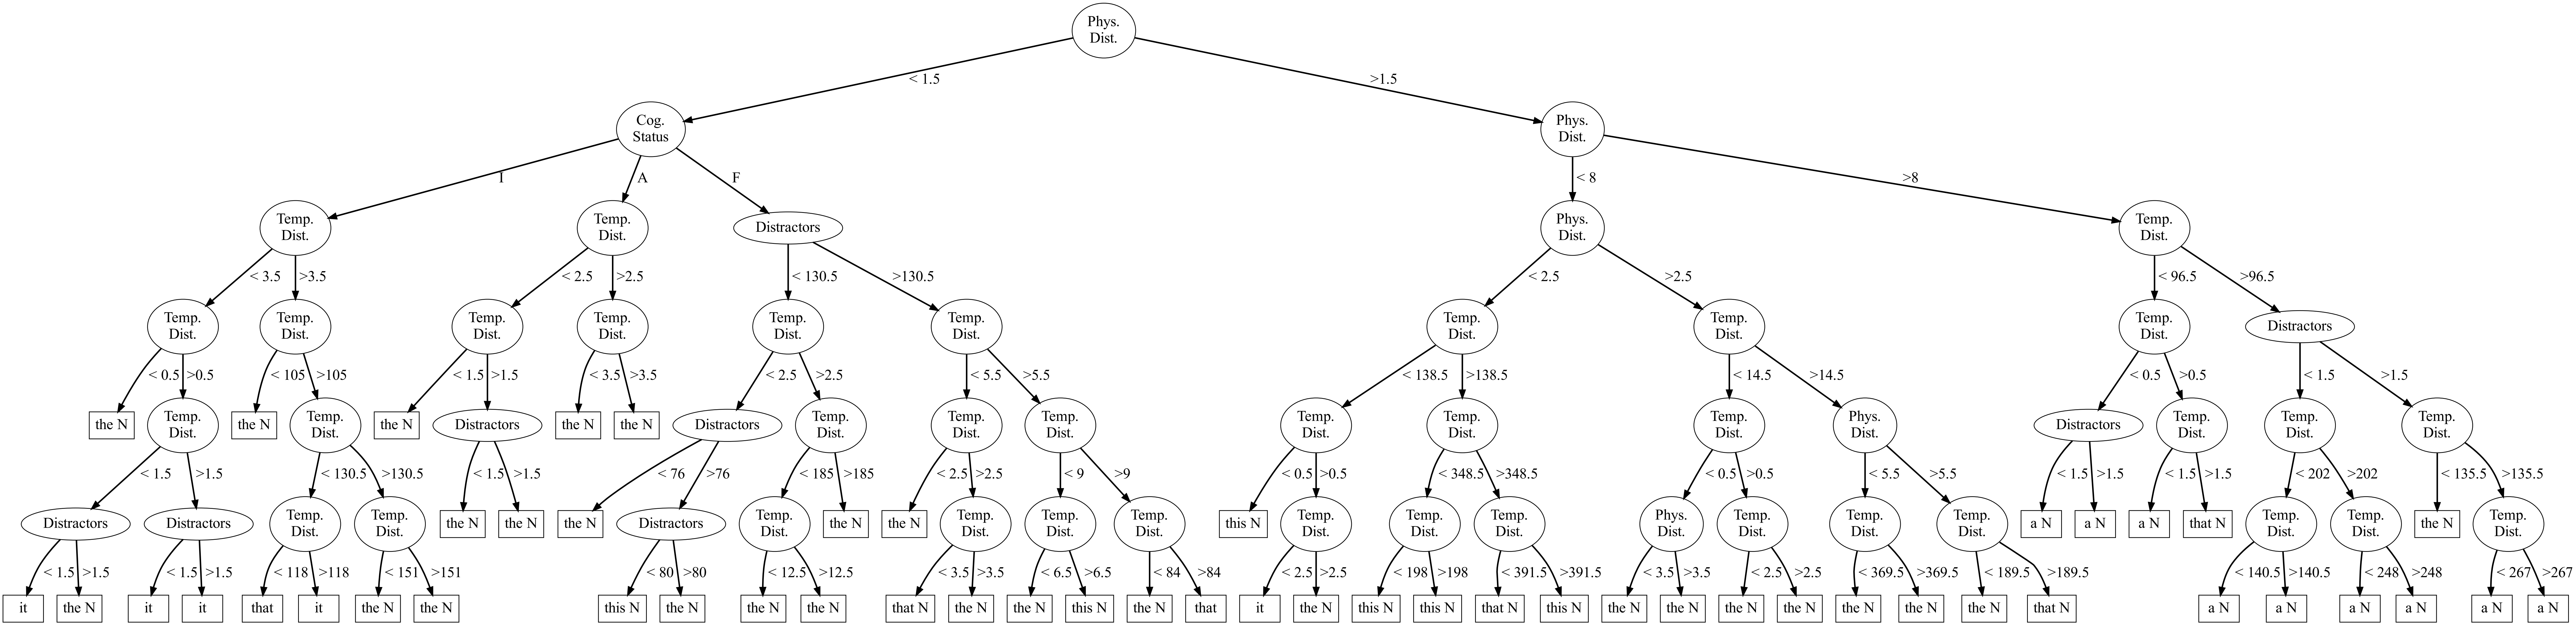

Supplement: software [file tree-M1.pdf › weka-dt/output/8-d6-noprune/tree-M1.pdf]

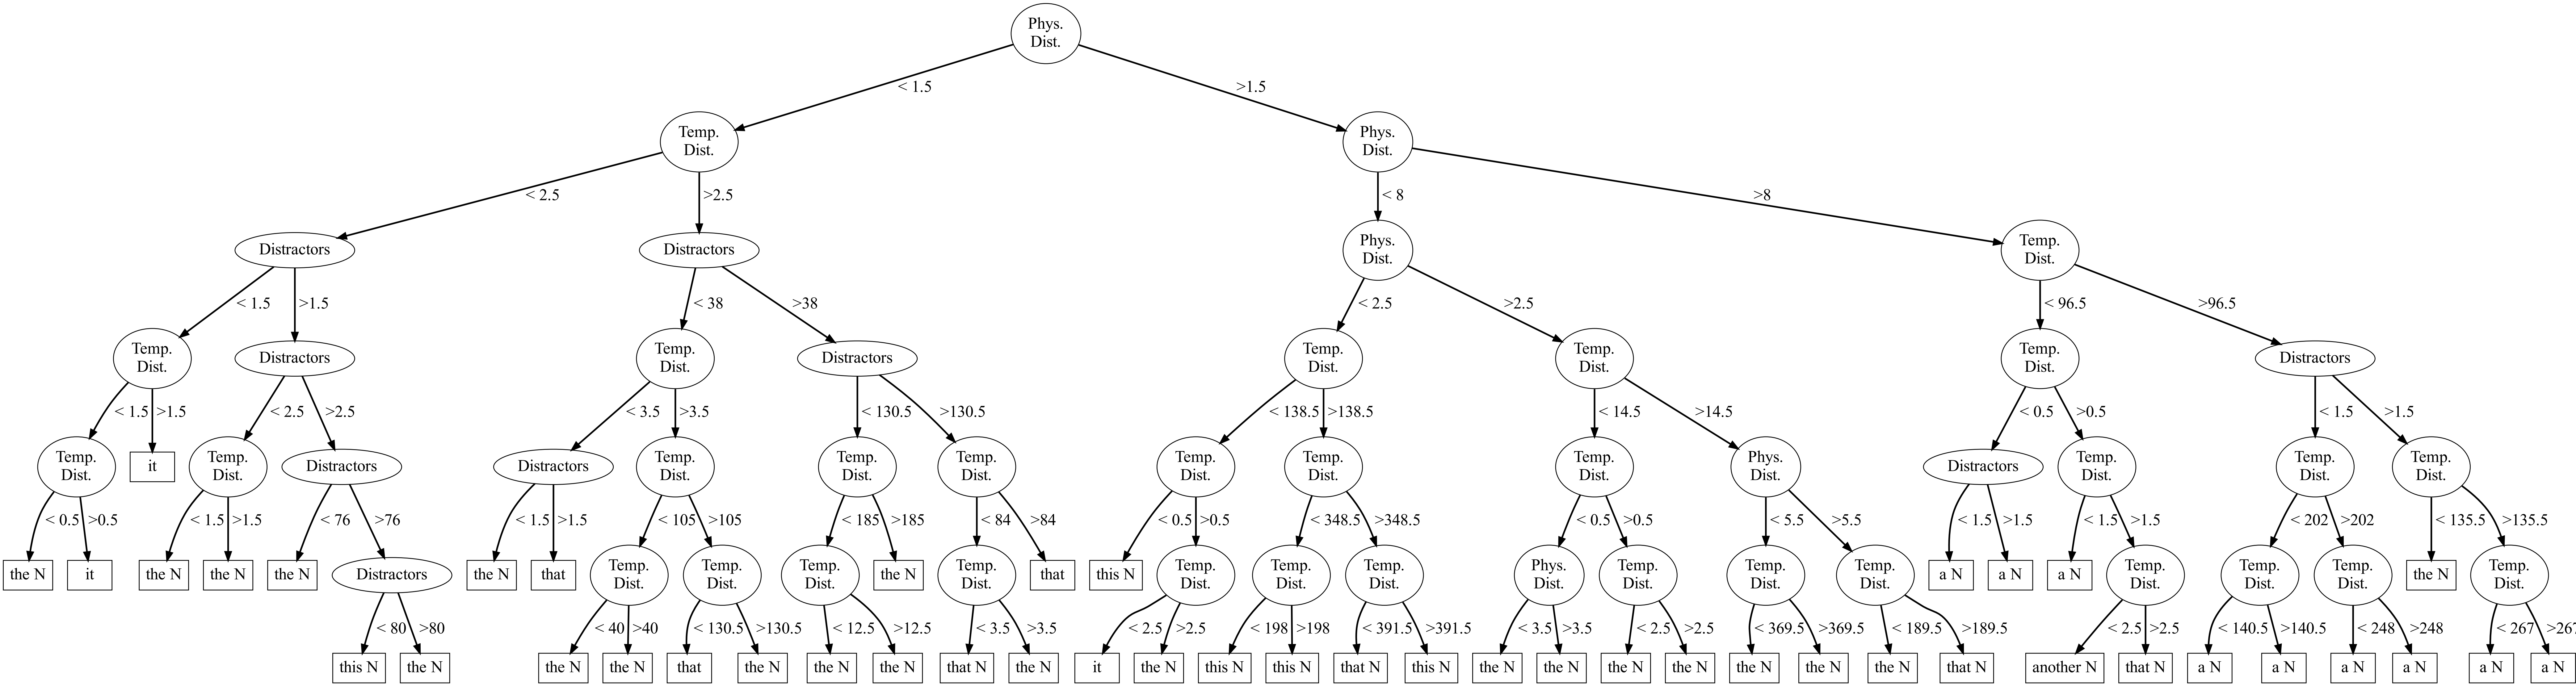

Supplement: software [file tree-M2.pdf › weka-dt/output/8-d6-noprune/tree-M2.pdf]

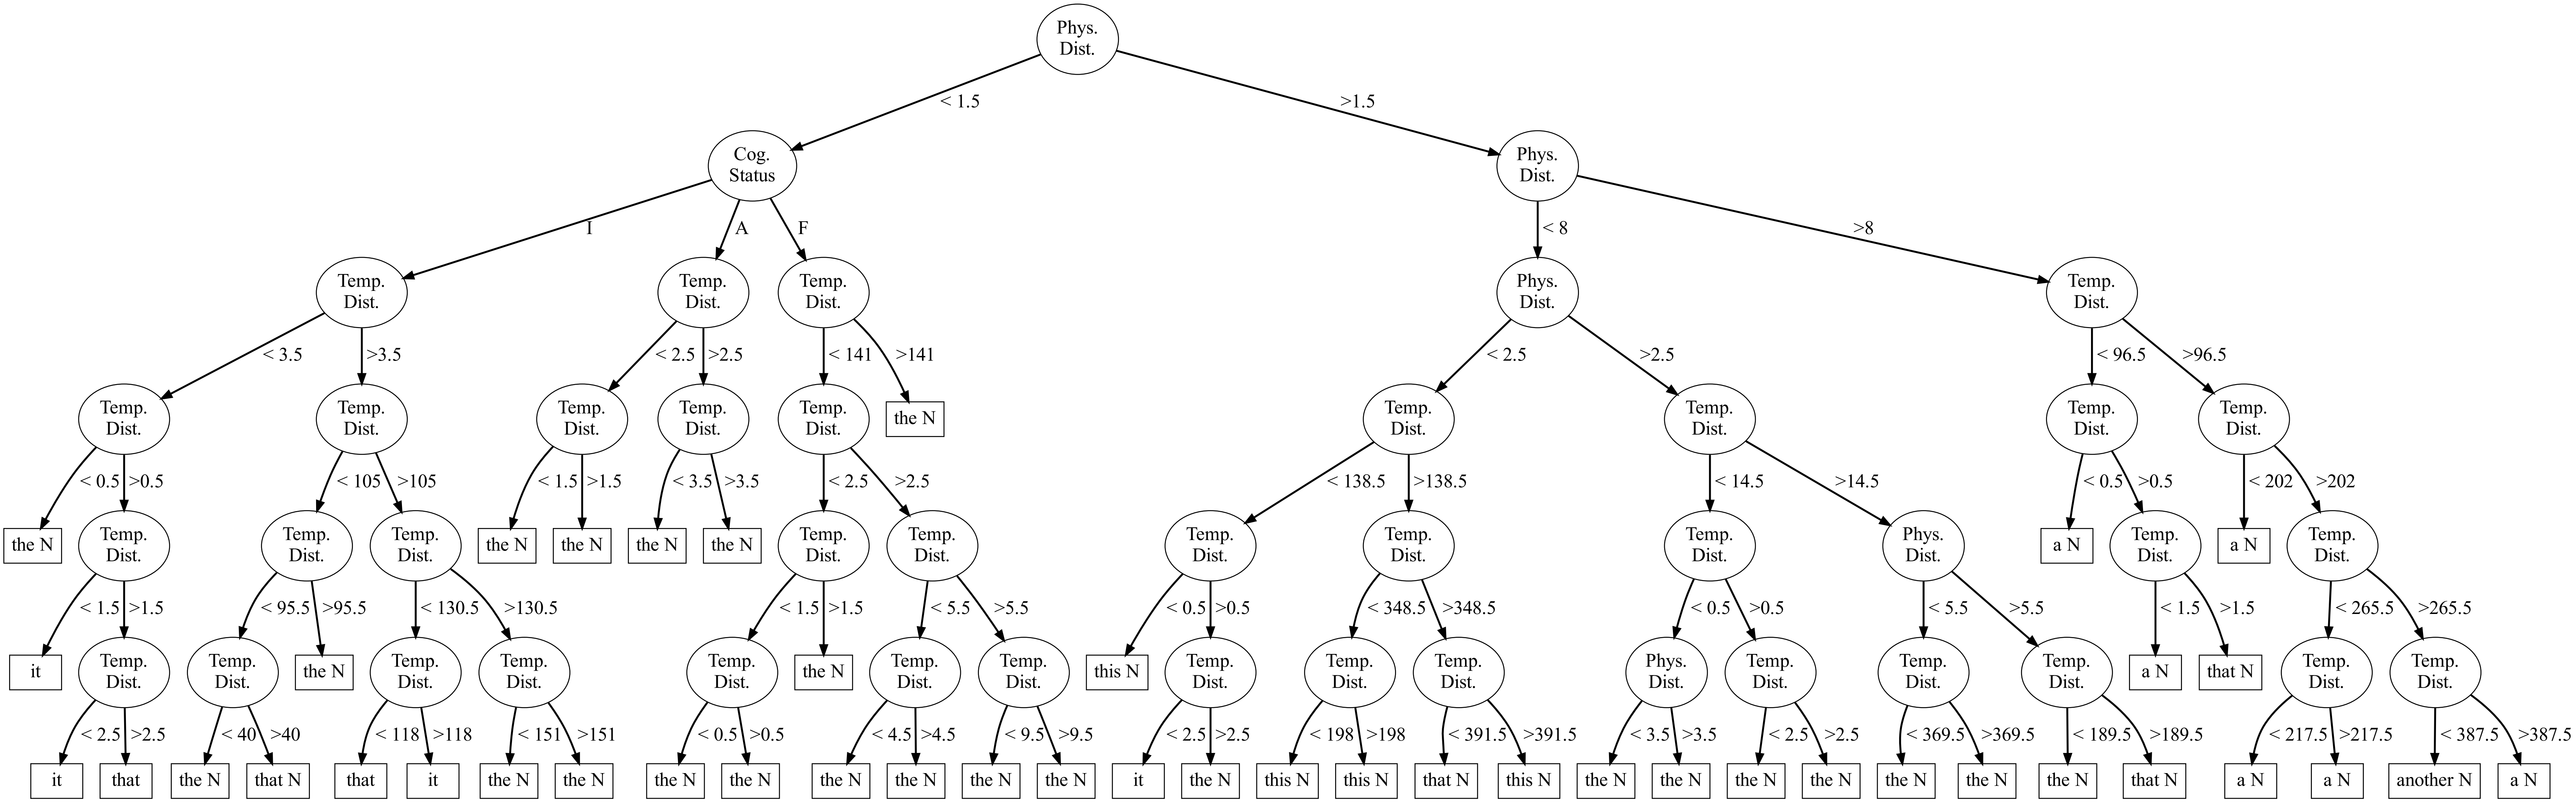

Supplement: software [file tree-M3.pdf › weka-dt/output/8-d6-noprune/tree-M3.pdf]

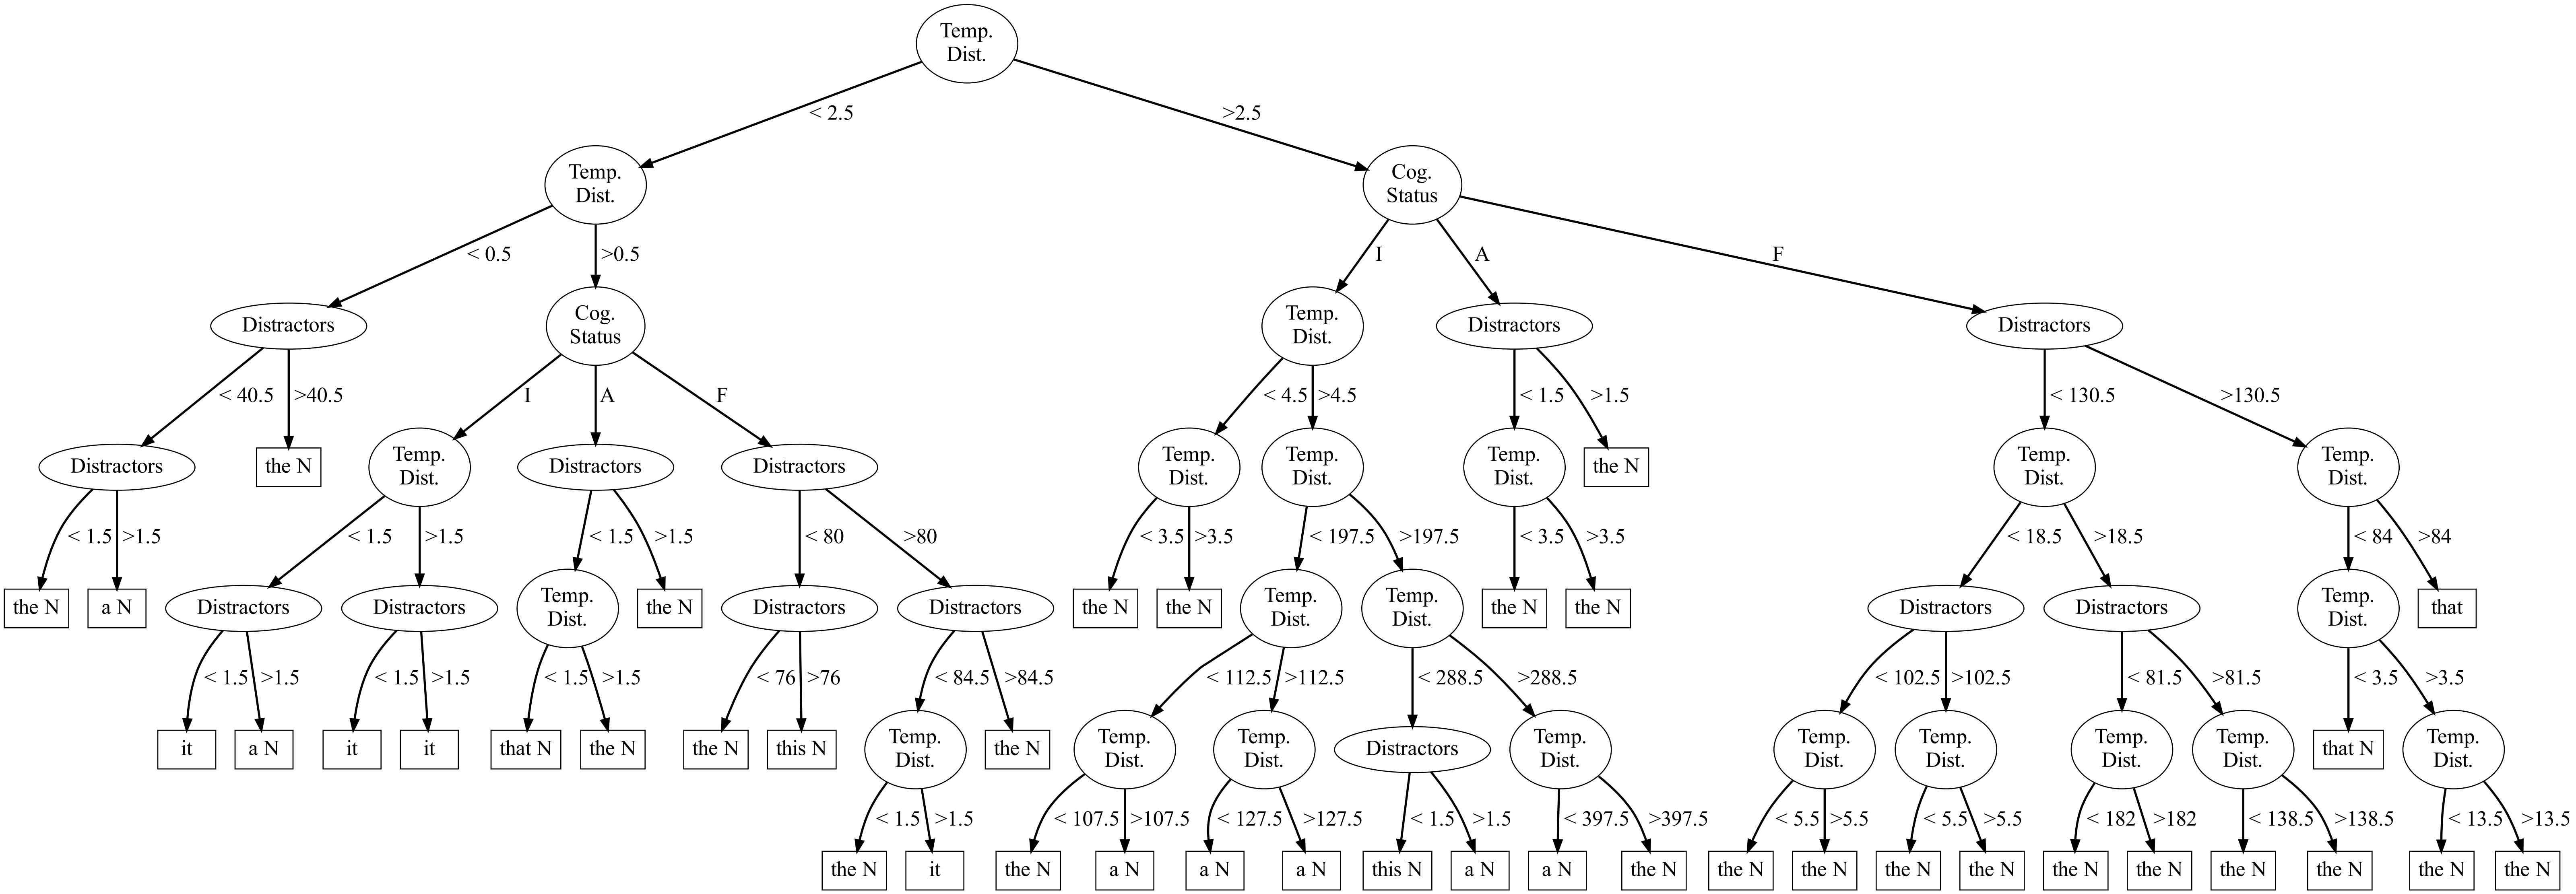

Supplement: software [file tree-M4.pdf › weka-dt/output/8-d6-noprune/tree-M4.pdf]

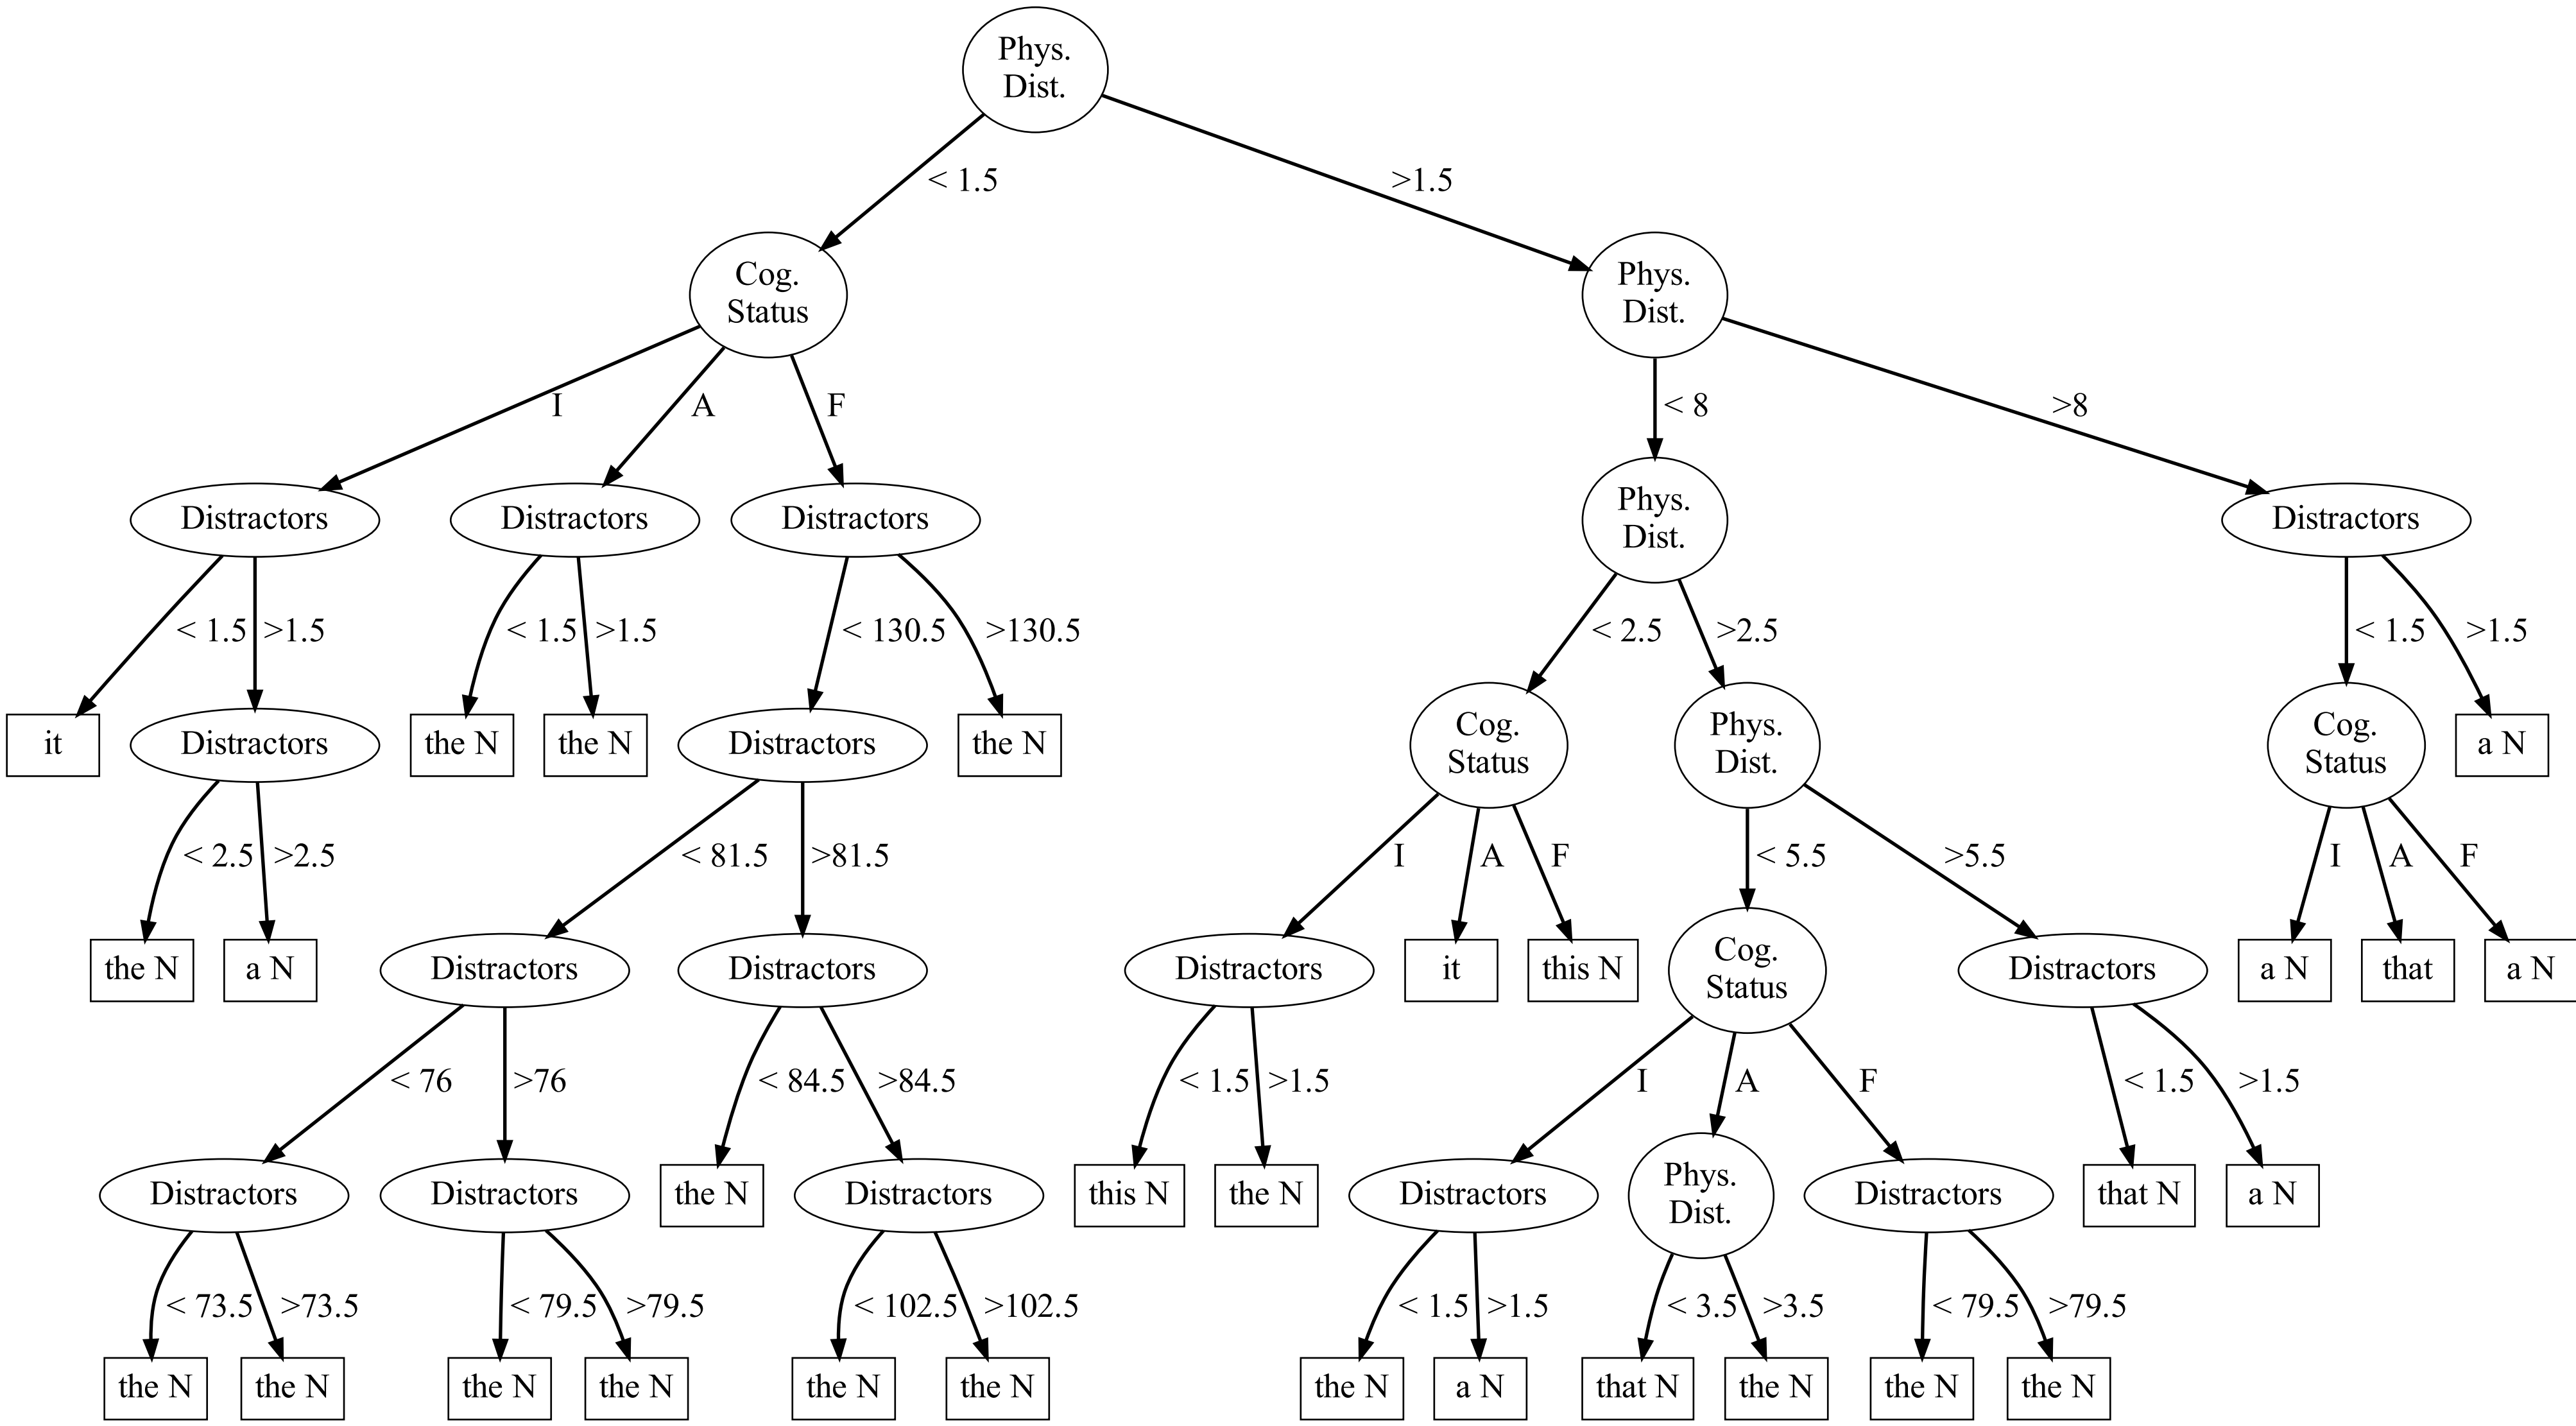

Supplement: software [file tree-M5.pdf › weka-dt/output/8-d6-noprune/tree-M5.pdf]



Supplement: software [file tree-M1.pdf › weka-dt/output/8-d6-prune/tree-M1.pdf]



Supplement: software [file tree-M2.pdf › weka-dt/output/8-d6-prune/tree-M2.pdf]



Supplement: software [file tree-M4.pdf › weka-dt/output/8-d6-prune/tree-M4.pdf]

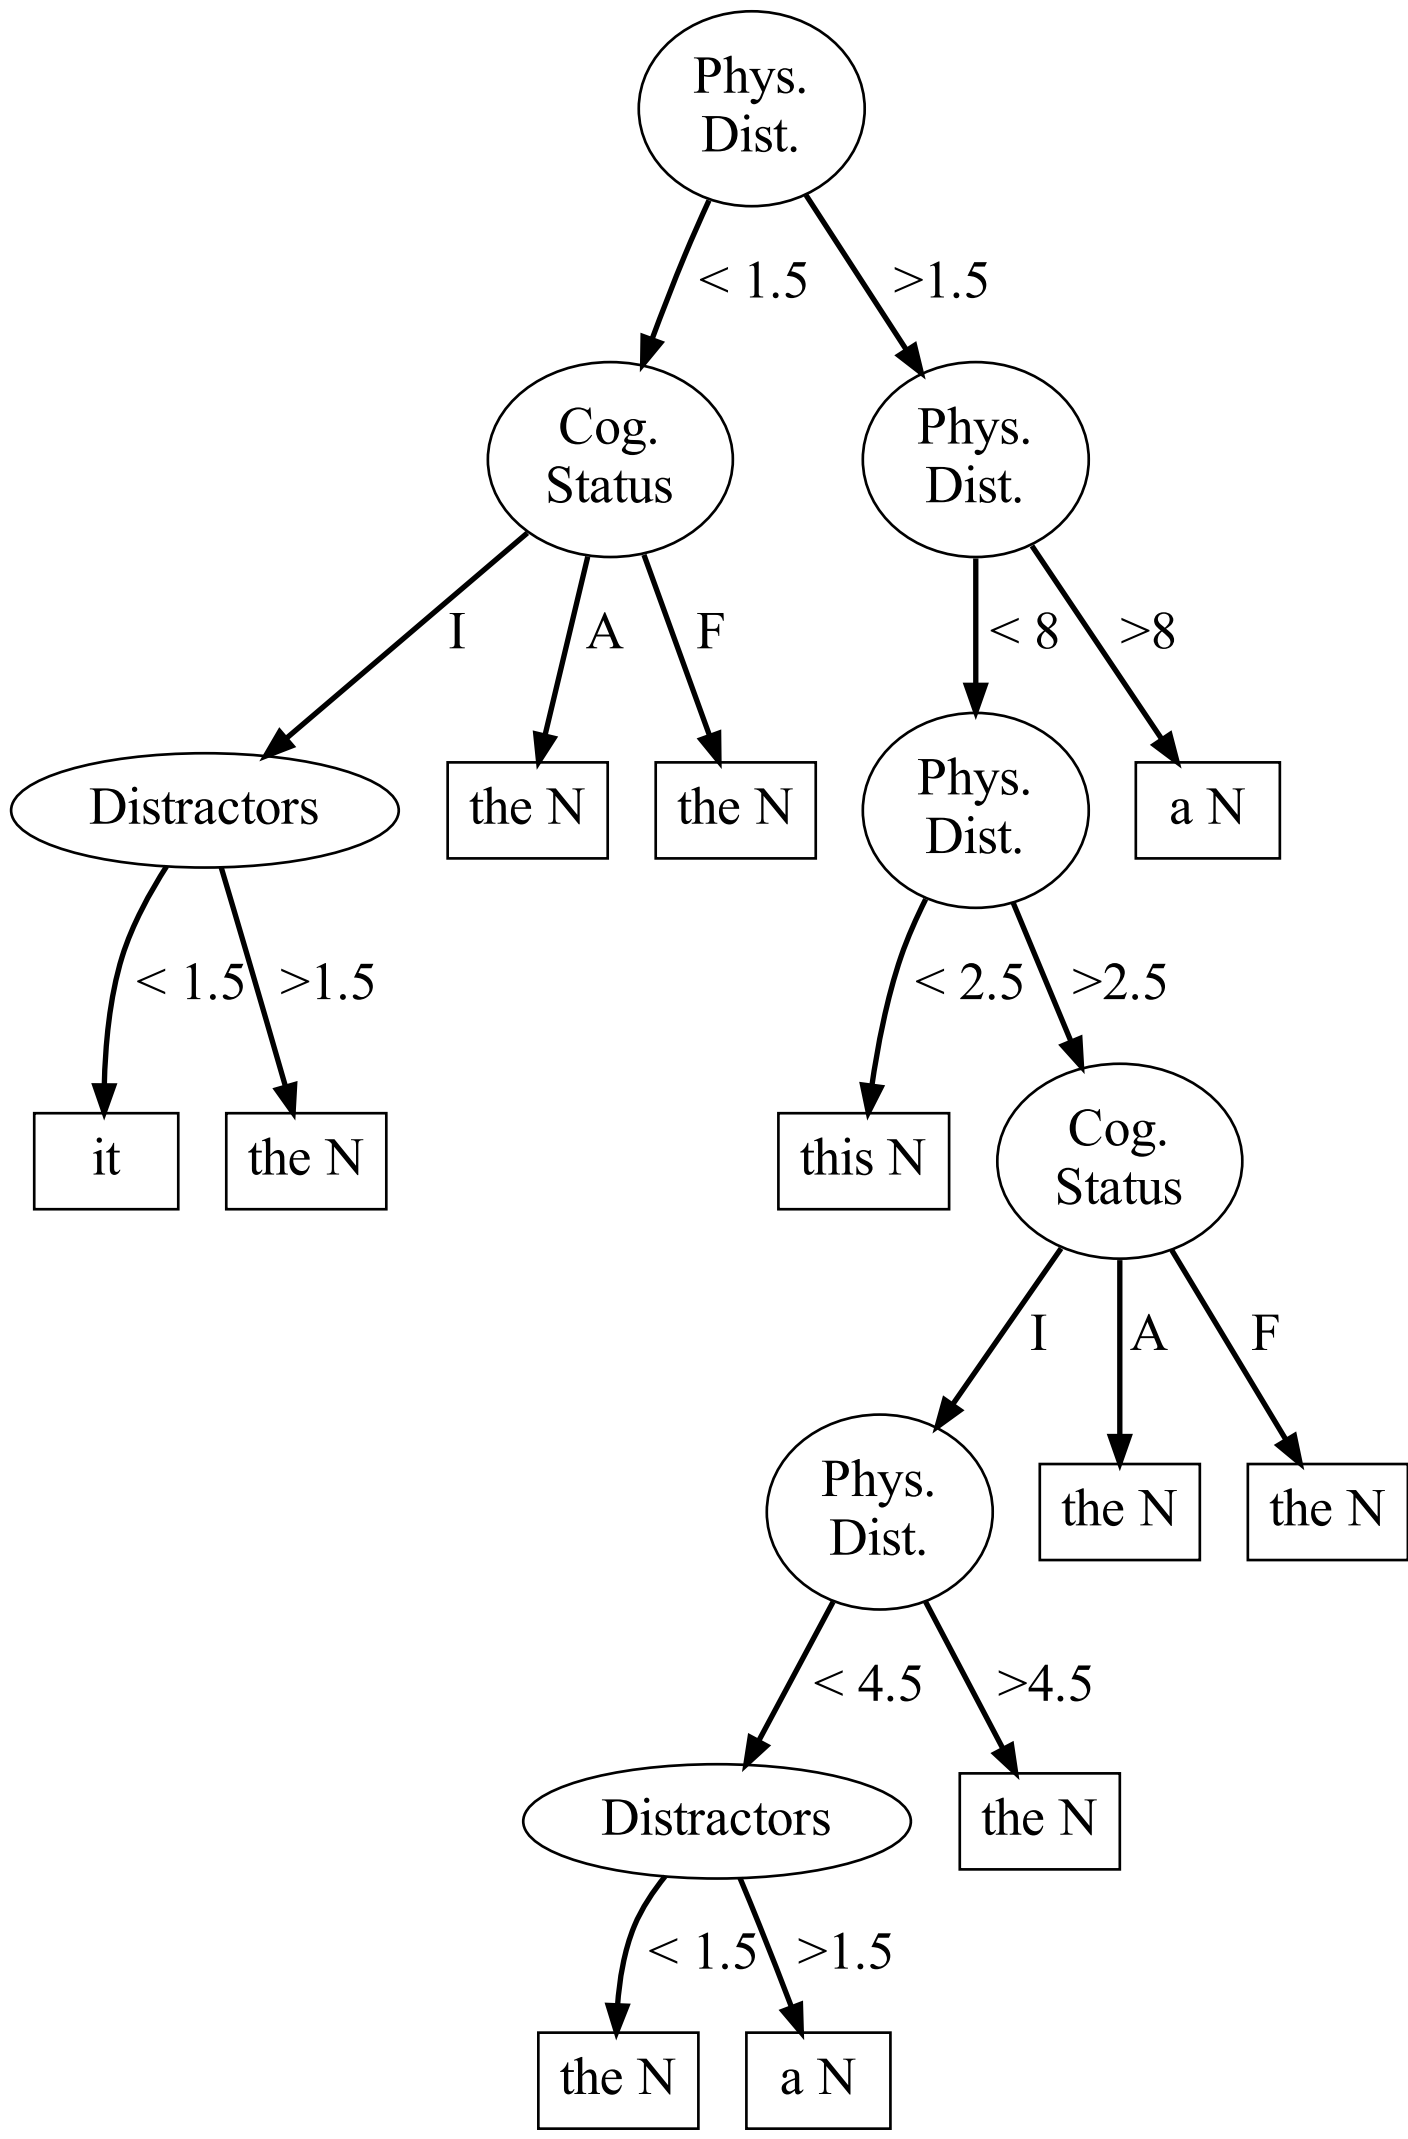

Supplement: software [file tree-M5.pdf › weka-dt/output/8-d6-prune/tree-M5.pdf]

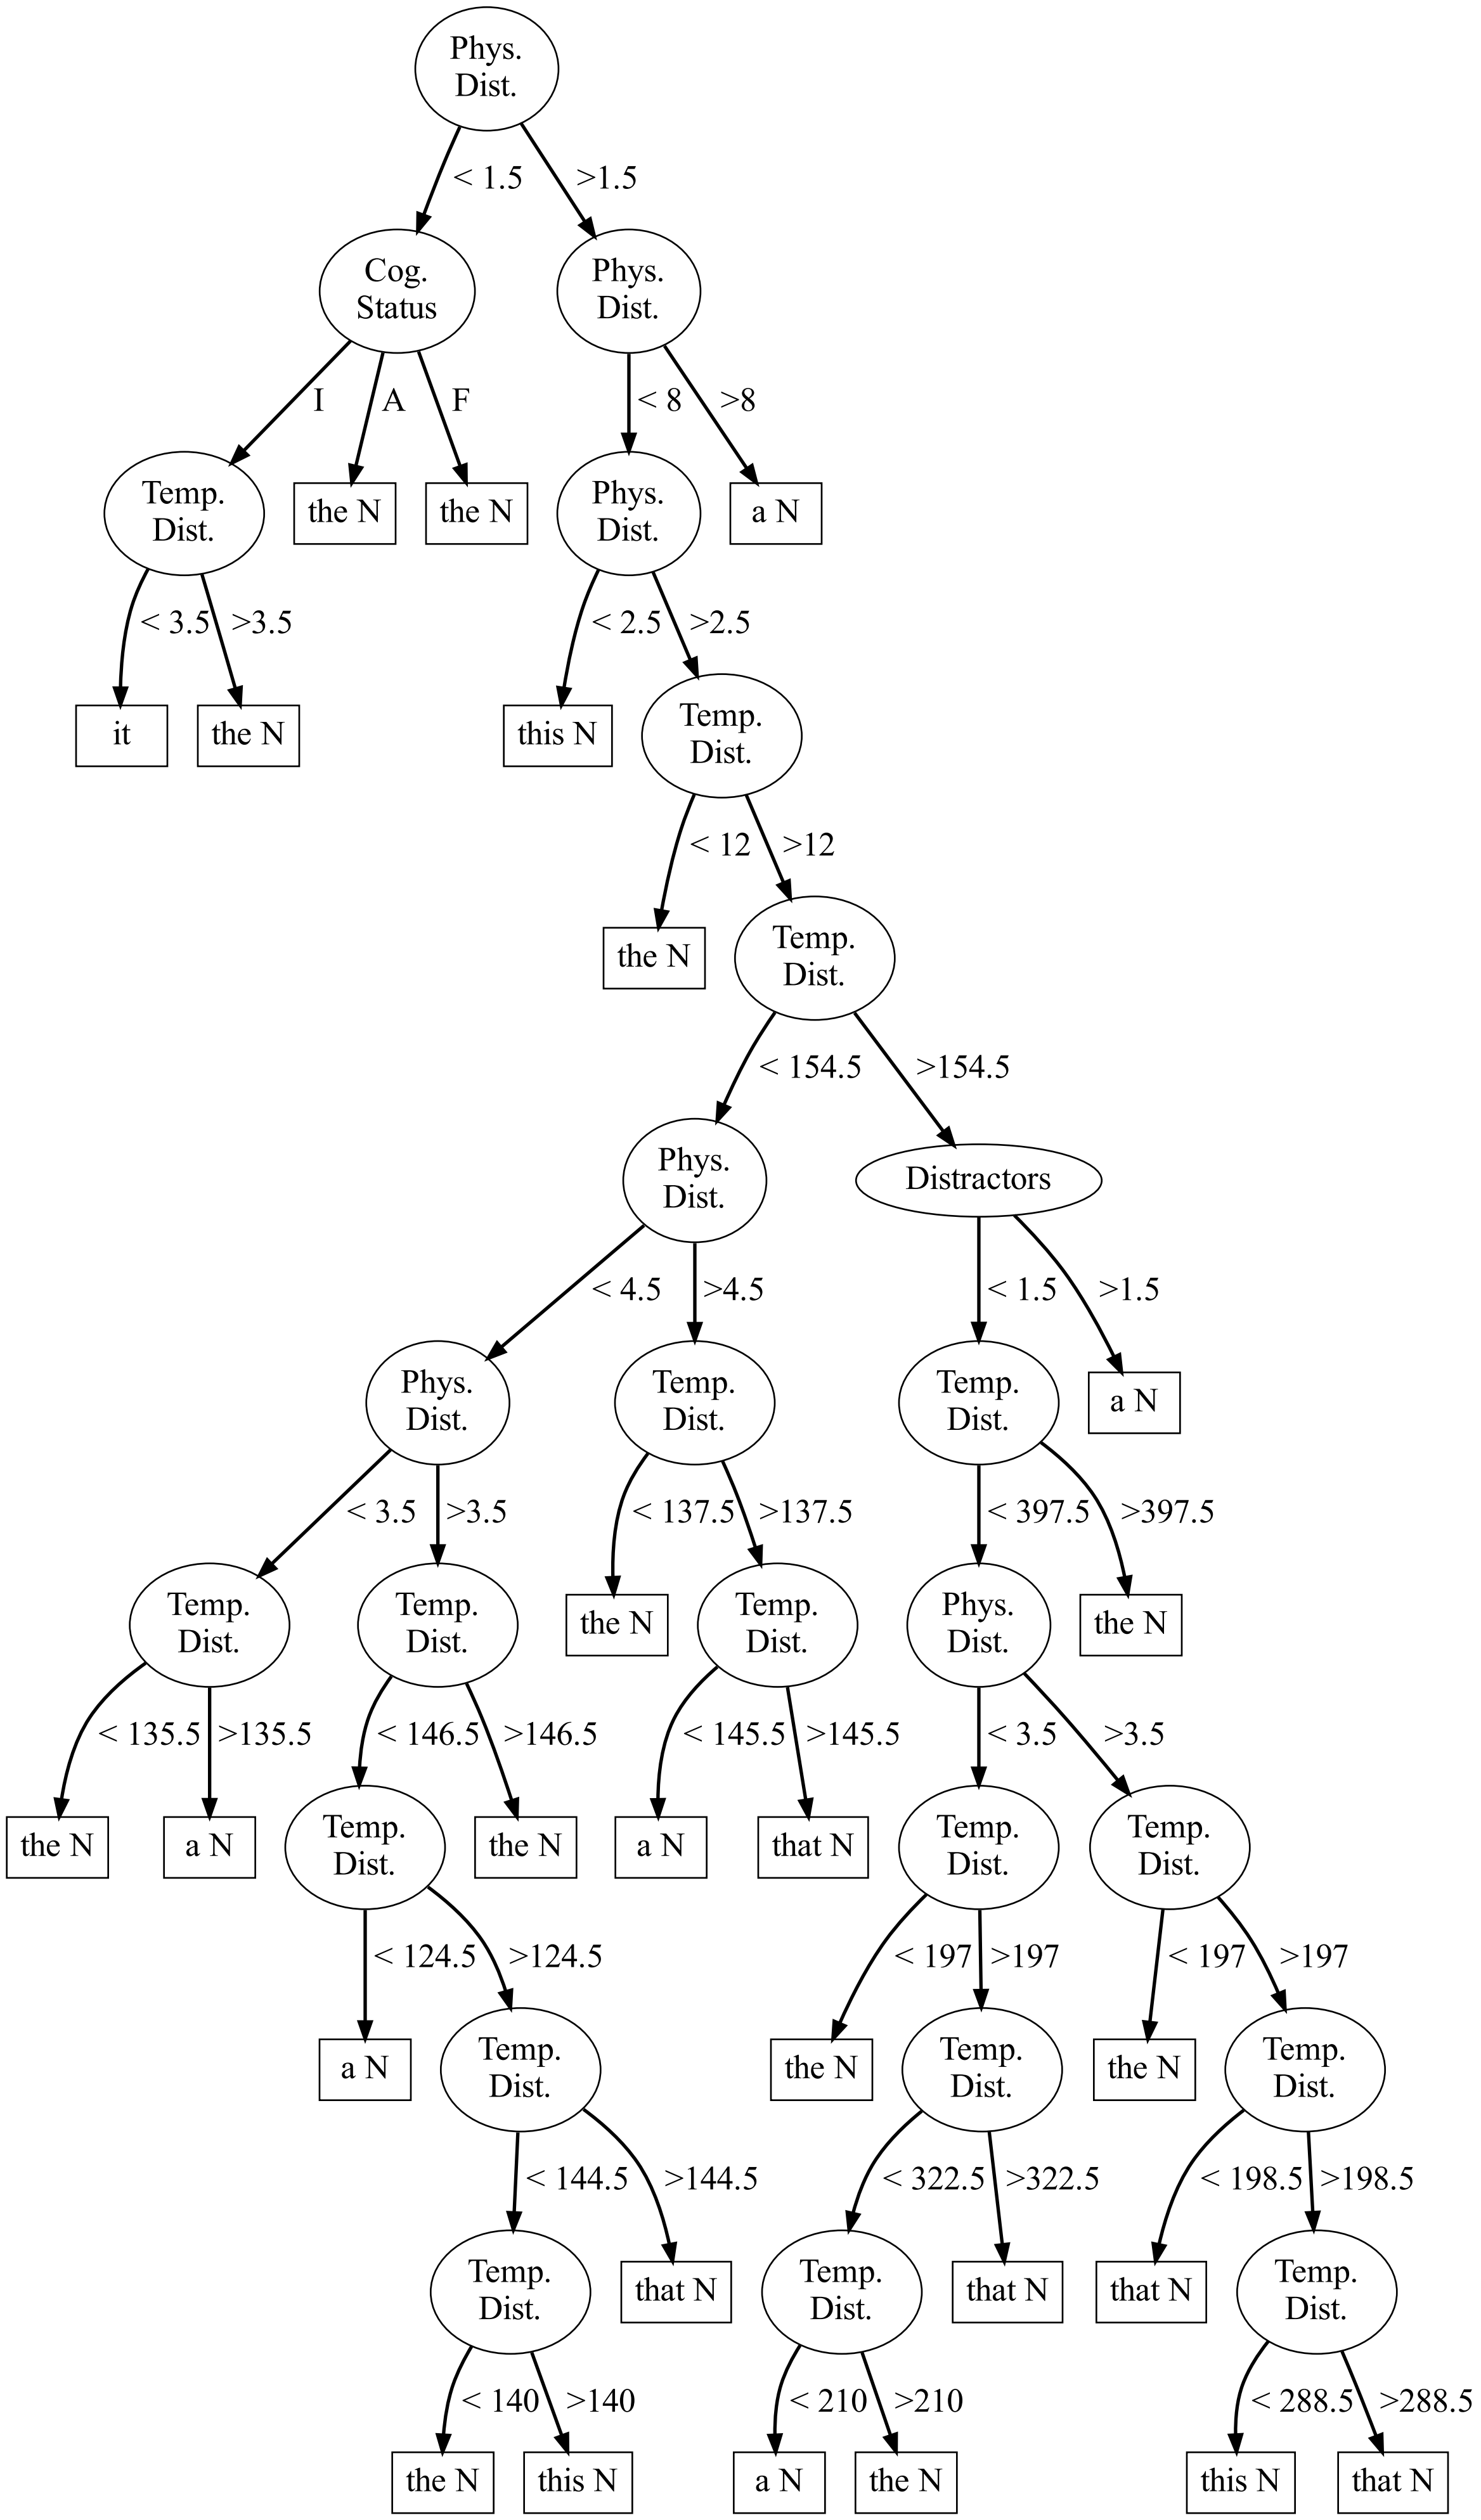

Supplement: software [file tree-M1.pdf › weka-dt/output/8/tree-M1.pdf]

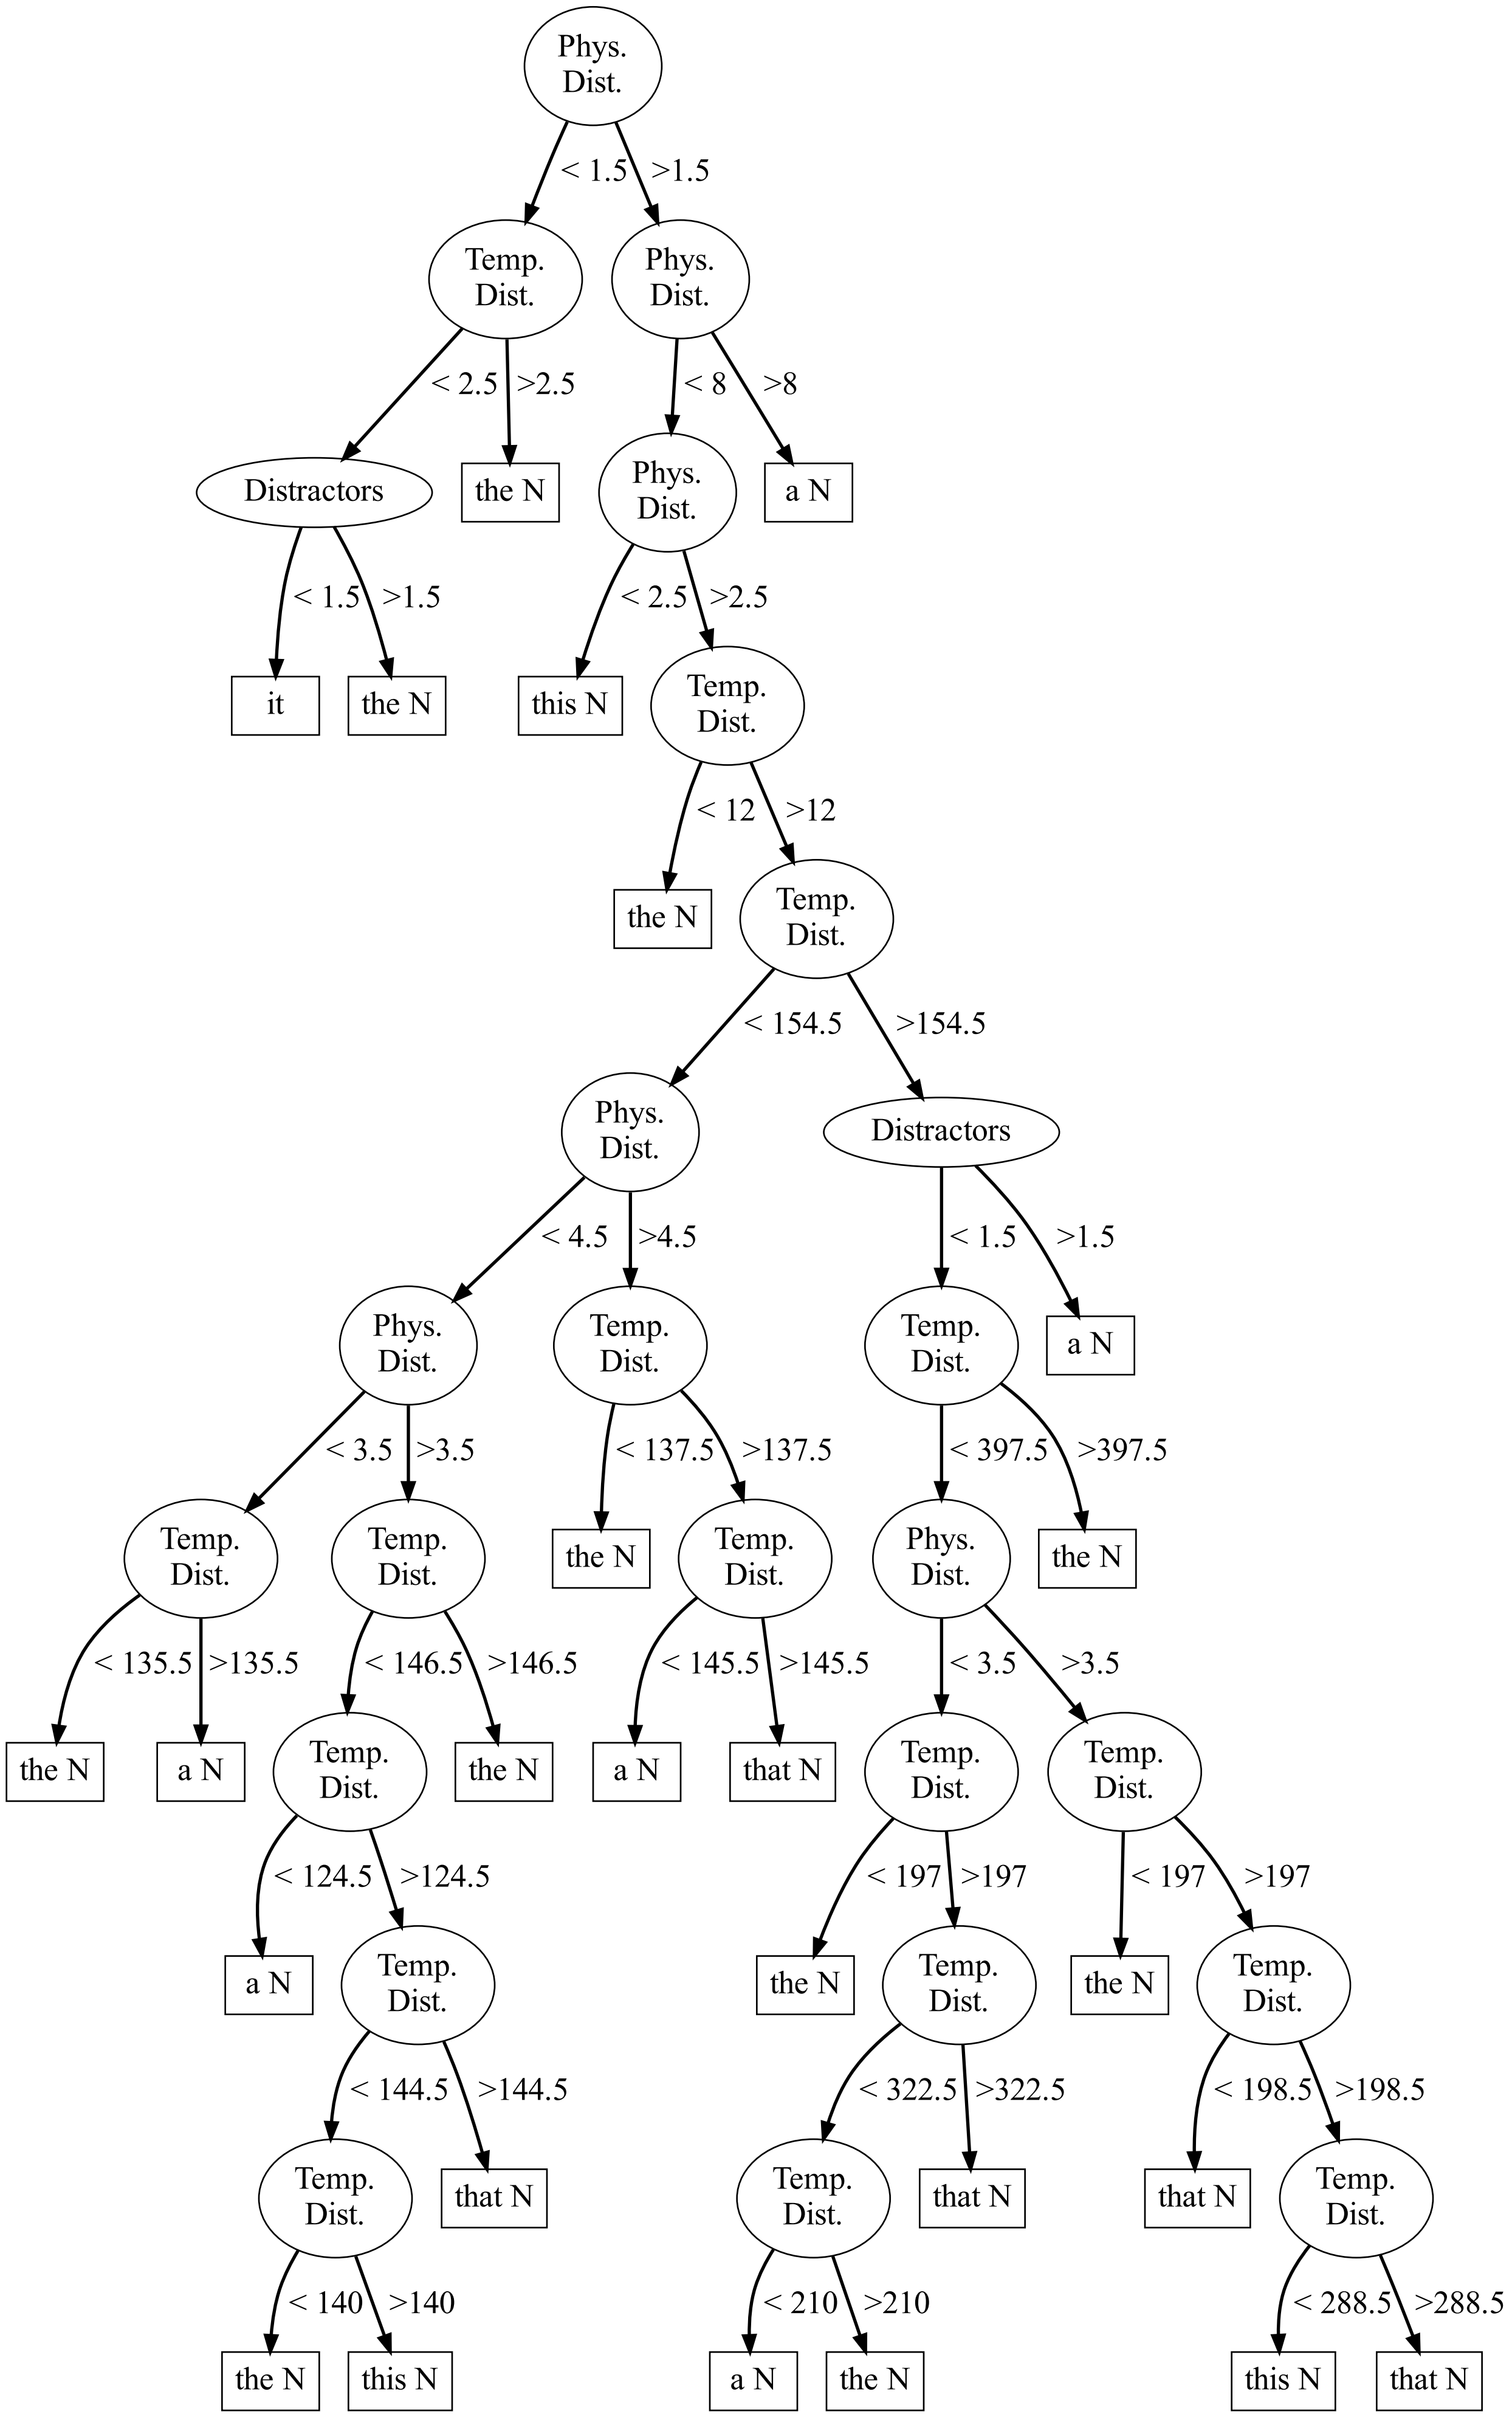

Supplement: software [file tree-M2.pdf › weka-dt/output/8/tree-M2.pdf]

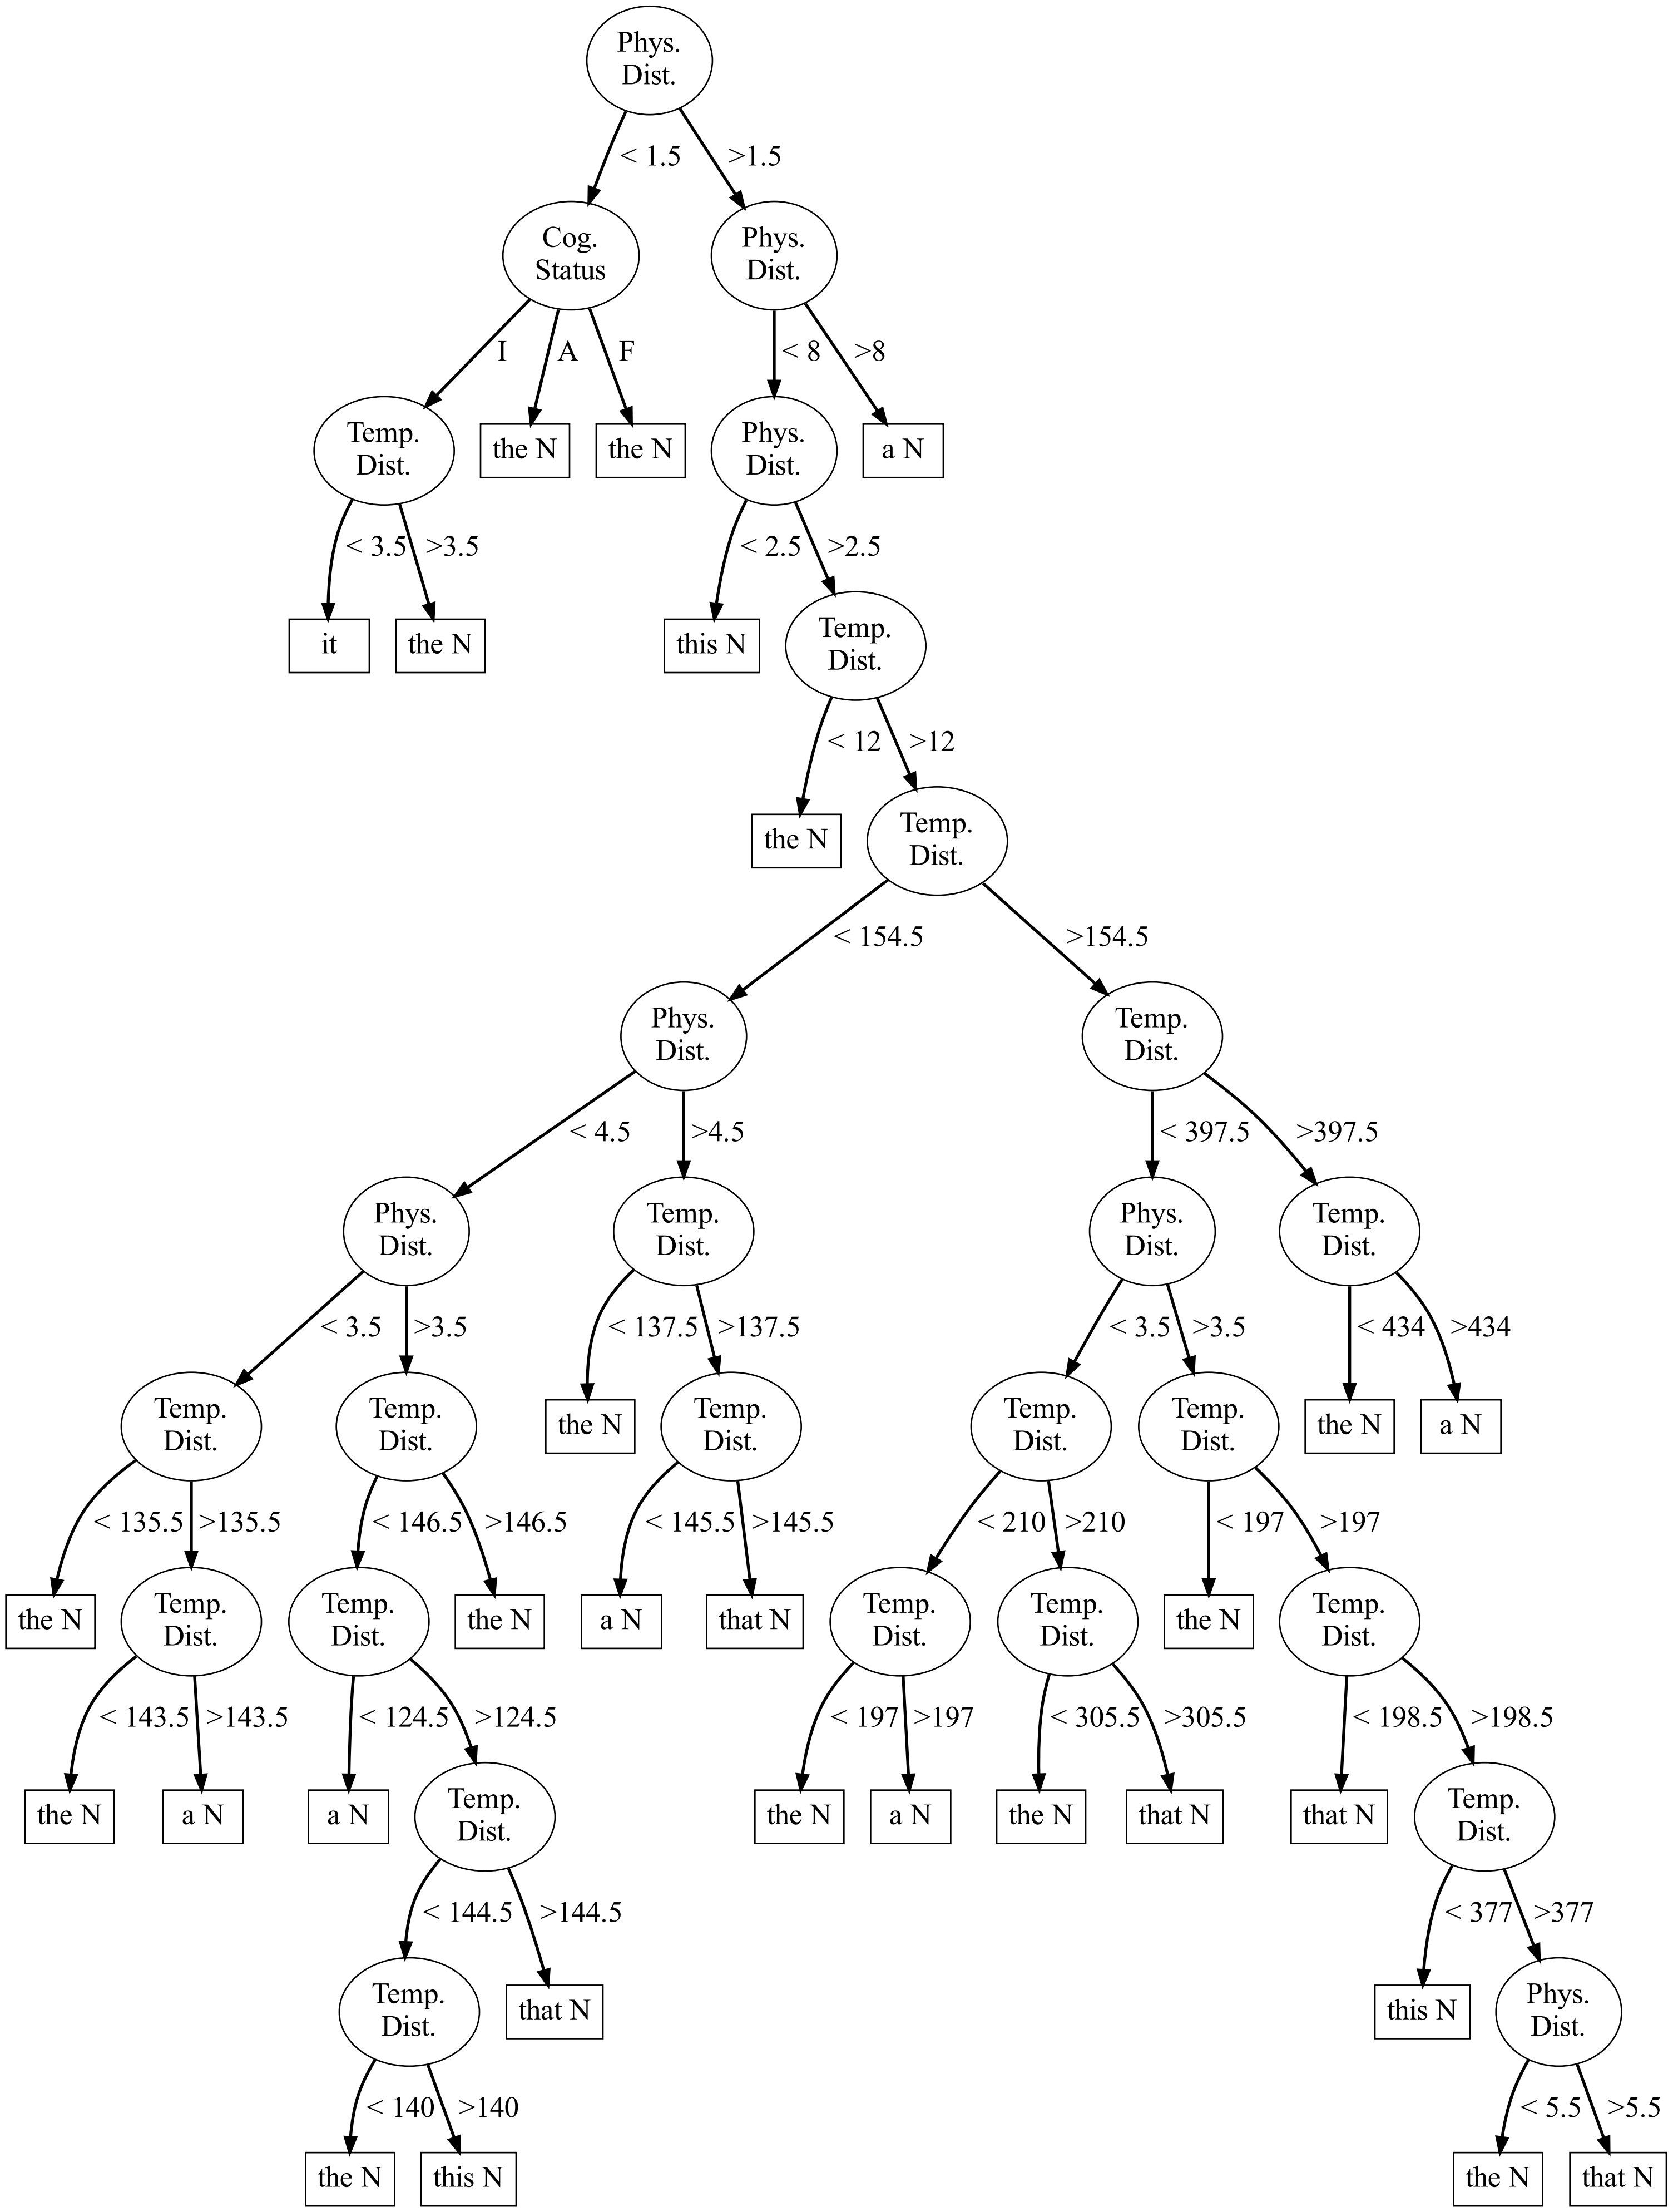

Supplement: software [file tree-M3.pdf › weka-dt/output/8/tree-M3.pdf]

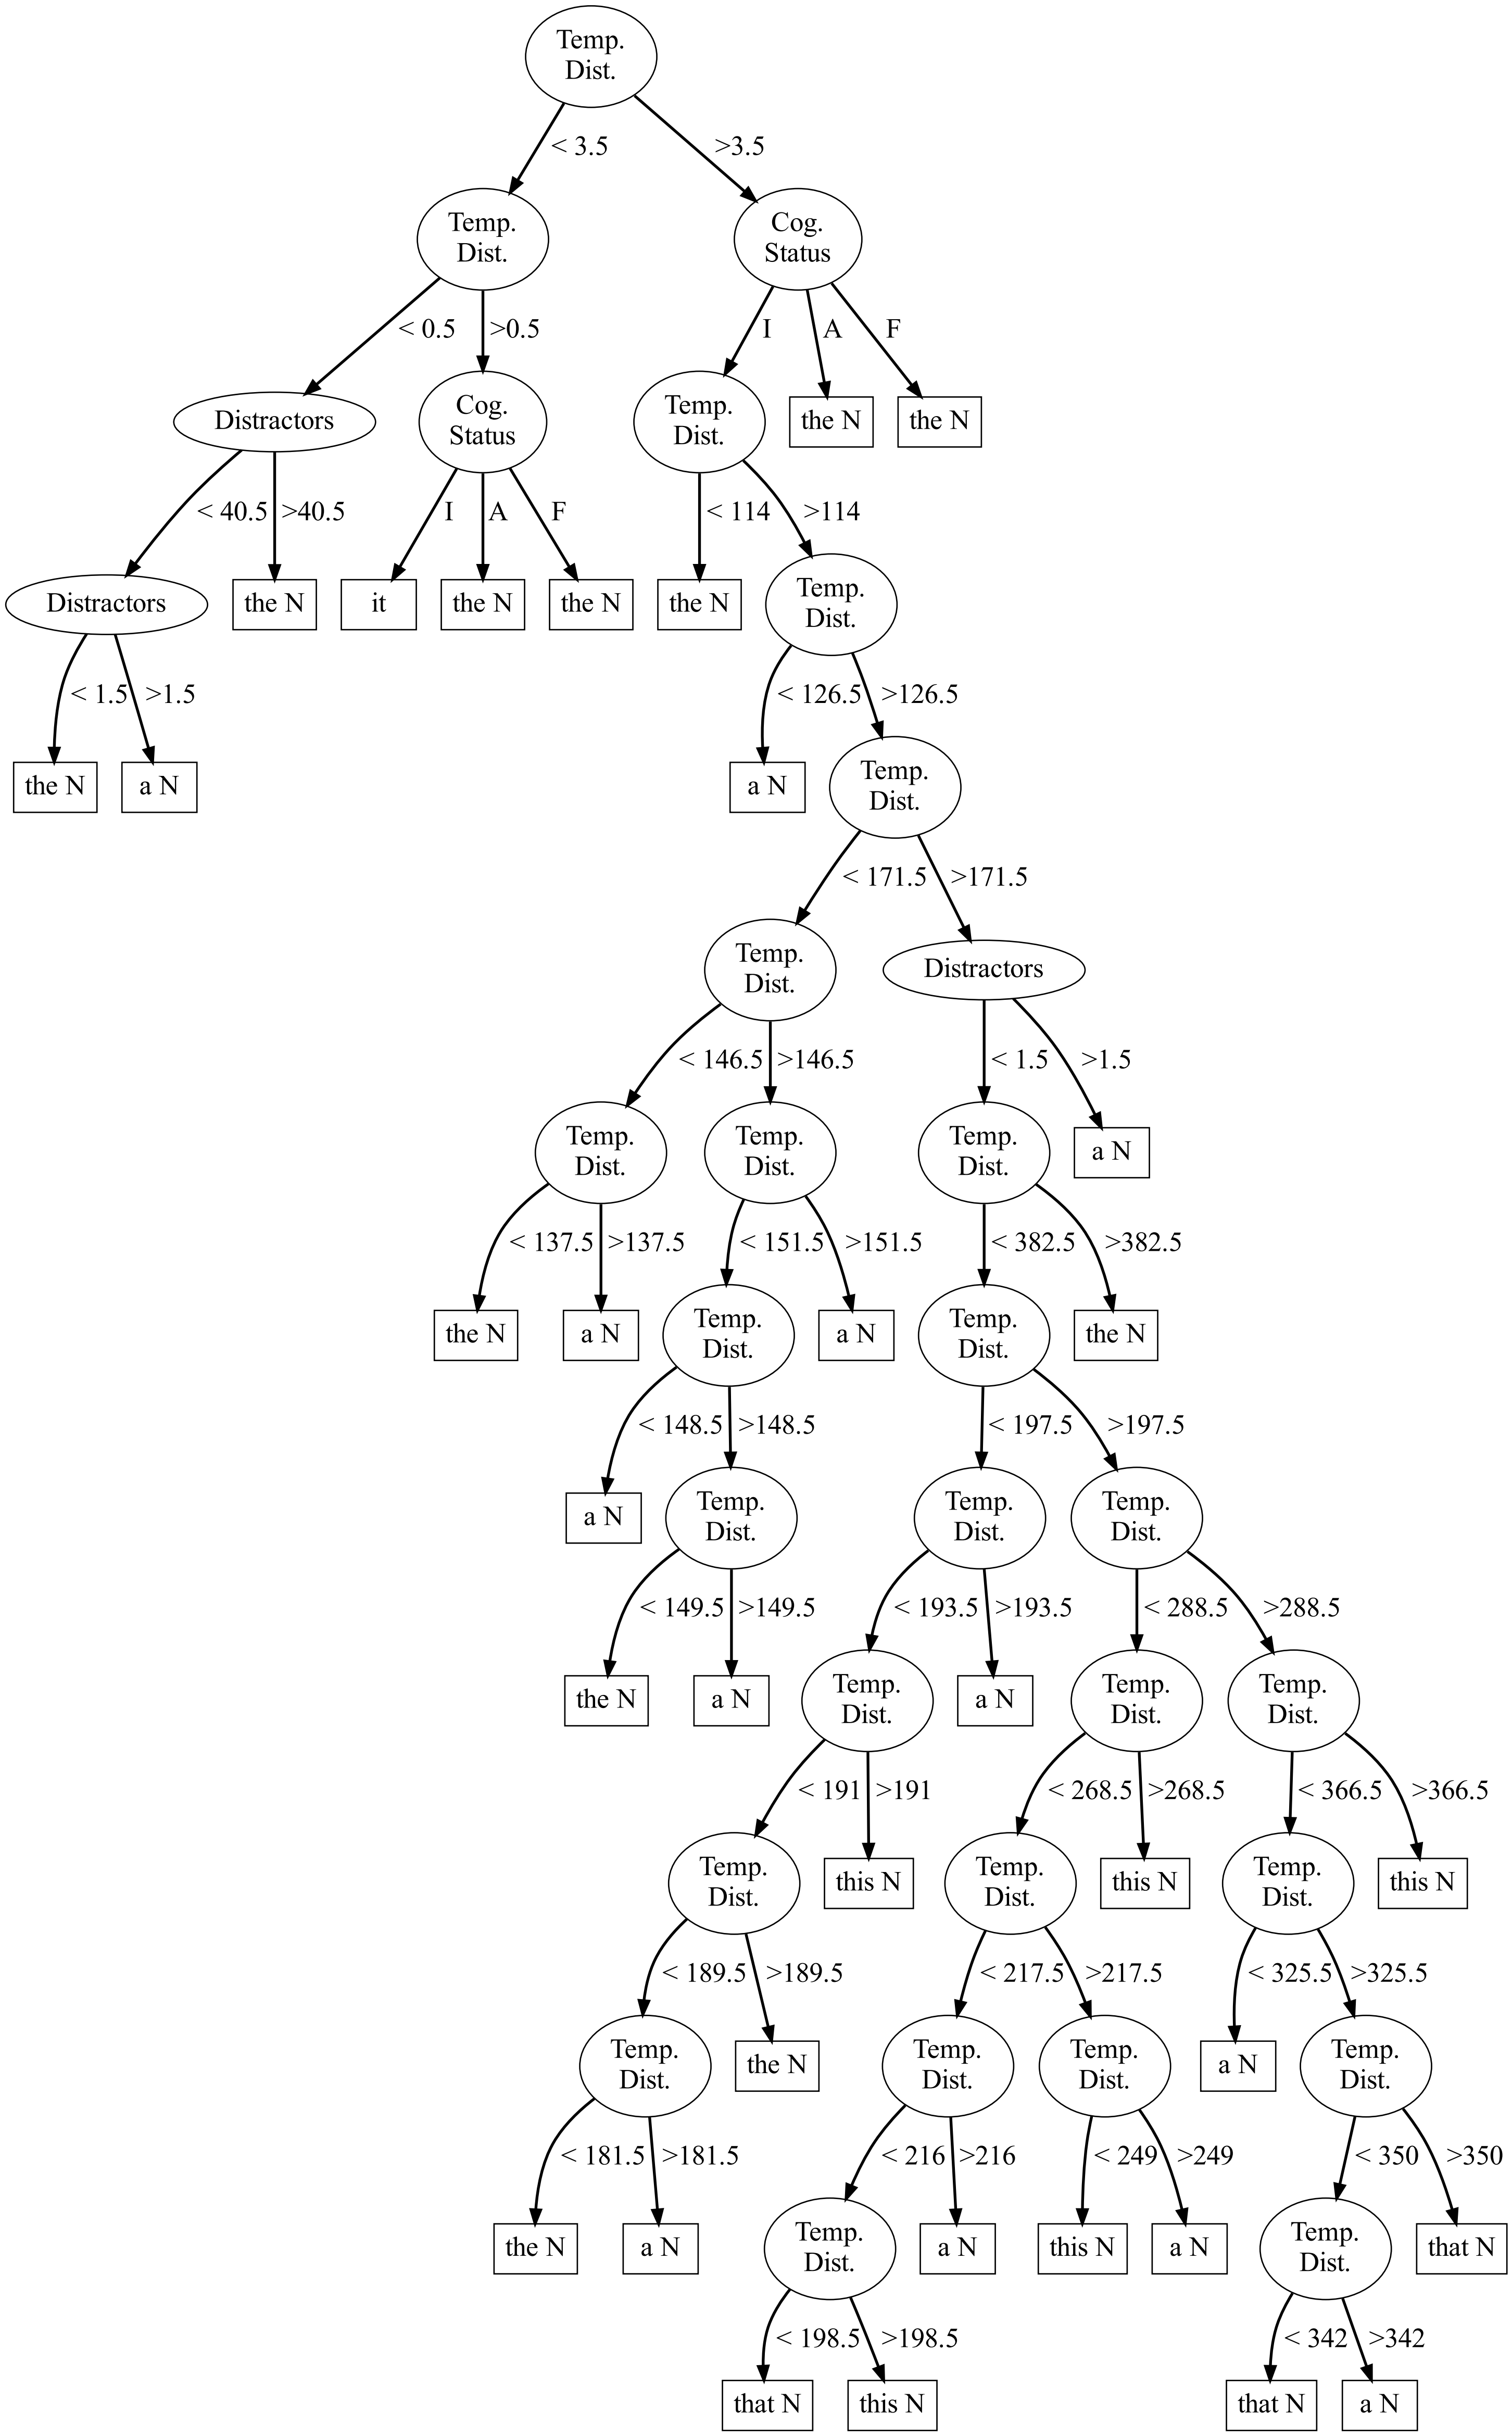

Supplement: software [file tree-M4.pdf › weka-dt/output/8/tree-M4.pdf]

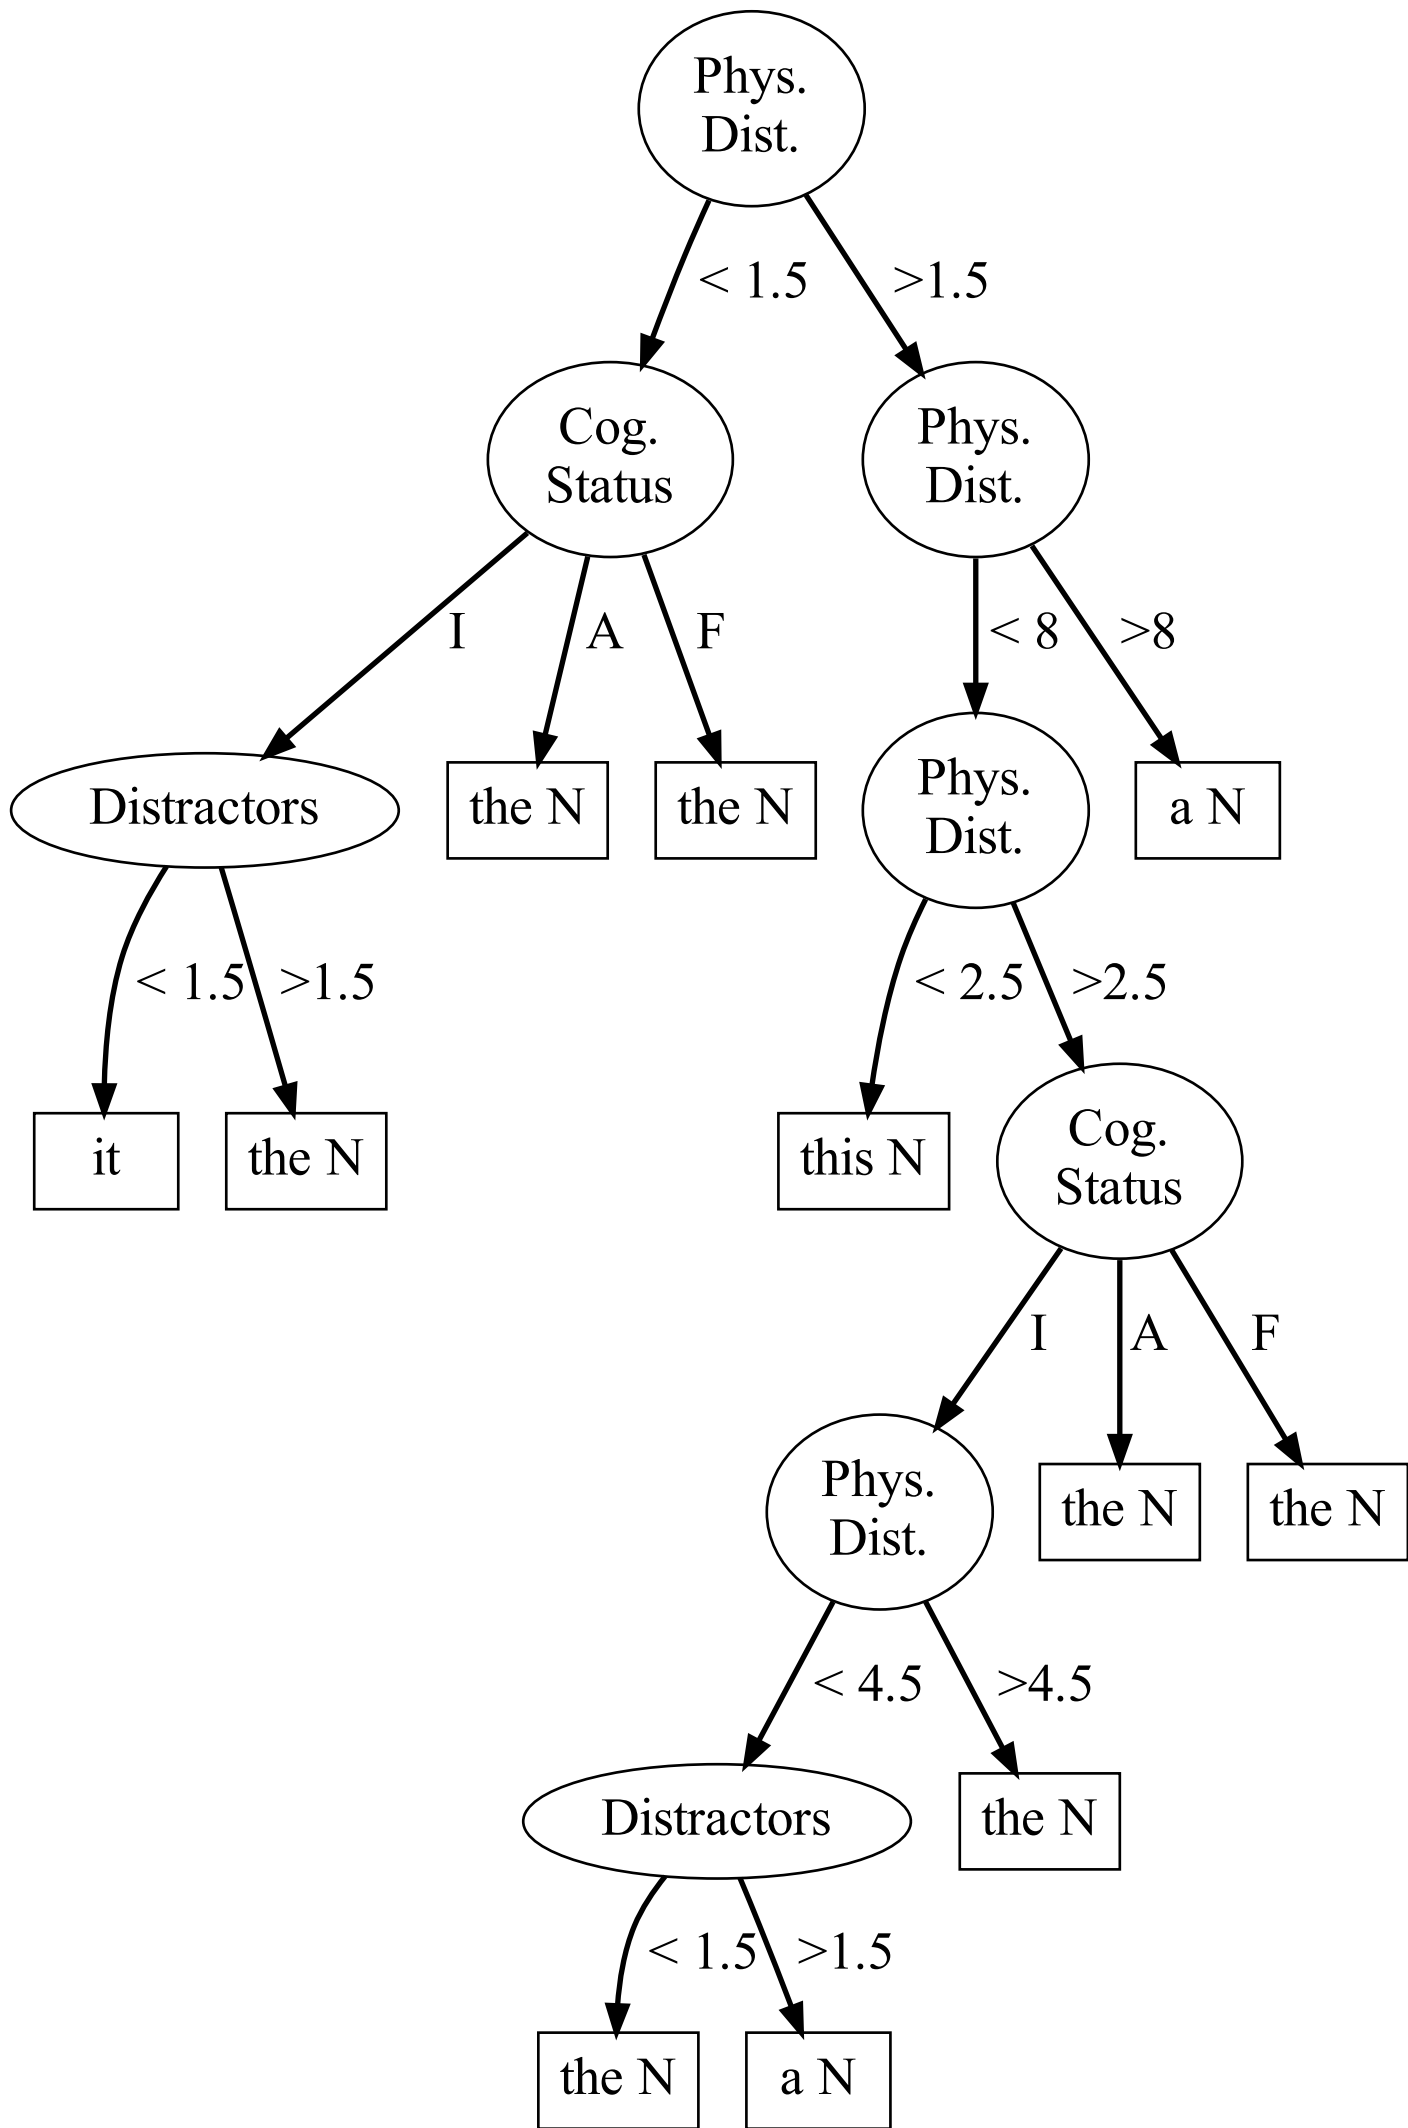

Supplement: software [file tree-M5.pdf › weka-dt/output/8/tree-M5.pdf]
